# Supplementary material for: Regulation of pDC fate determination by histone deacetylase 3
Source: eLife journal article supplement (doi:10.7554/elife.80477), 2023-11-23
Supplement: supp [file Figure 1- figure supplement 2D source data 1.docx]

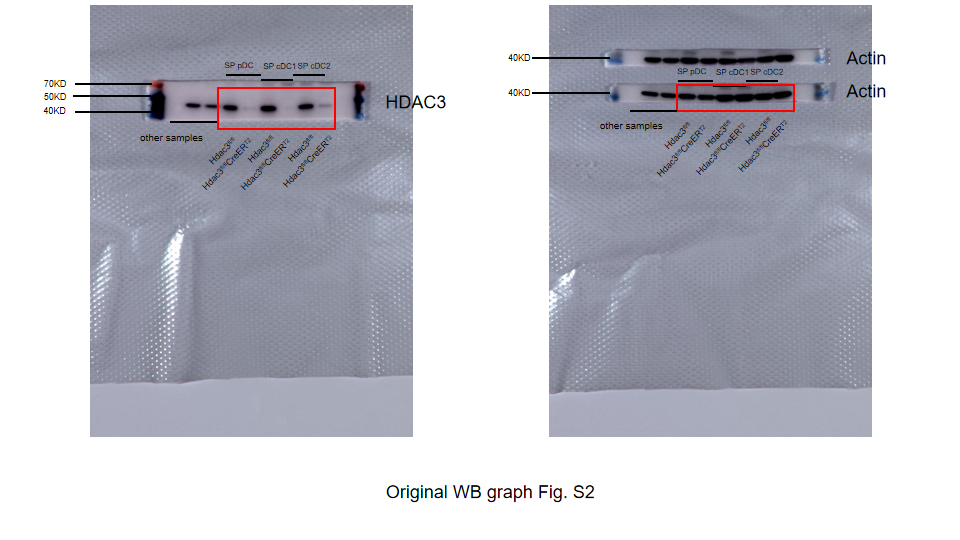


Another gel

**Figure 1 - figure supplement 2D - source data 1.** Western blot of HDAC3 knockout efficiency in *Rosa26*-CreERT2 induce HDAC3 conditional knockout splenic DC subsets.
