# Supplementary material for: Regulation of pDC fate determination by histone deacetylase 3
Source: eLife journal article supplement (doi:10.7554/elife.80477), 2023-11-23
Supplement: supp [file Figure 5- figure supplement 1B source data 1.docx]

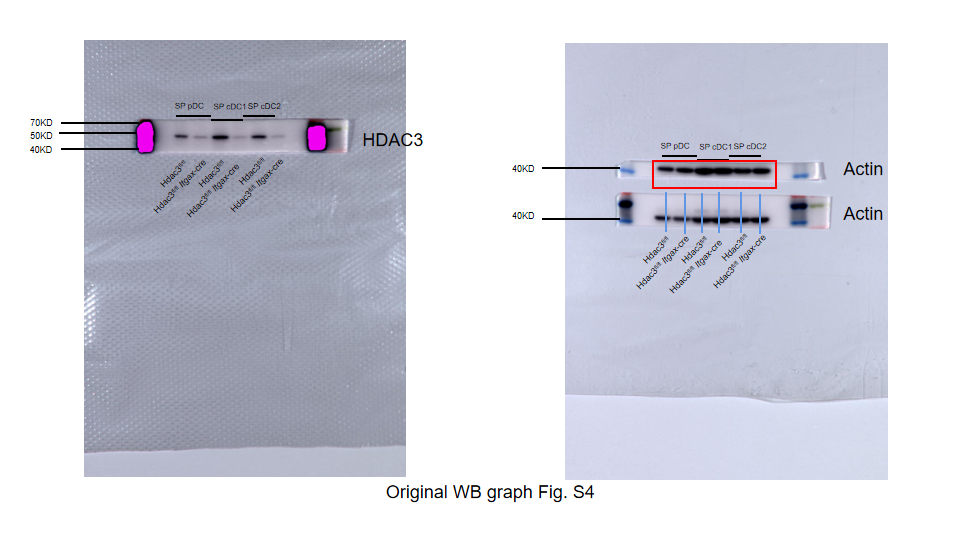


Another gel

**Figure 5 - figure supplement 1B - source data 1.** Western blot of HDAC3 knockout efficiency in *Itgax*-Cre induce HDAC3 conditional knockout splenic DC subsets.
