# Supplementary material for: Regulation of pDC fate determination by histone deacetylase 3
Source: eLife. 2023 Nov 27;12:e80477. doi: 10.7554/eLife.80477 (PMC10732571; doi:10.7554/eLife.80477)
Supplement: Supplementary file 1. — Genes increased or decreased in Hdac3 deficient bone pDCs (fold change ≥2 and P-value ≤0.5). [file elife-80477-supp1.xlsx]

## Sheet: Increased in KO-pDC
Gene Symbol	log2 (pDCKO / pDCWT)	Qvalue (pDCKO / pDCWT)	pDCKO1 FPKM	pDCKO2 FPKM	pDCWT1 FPKM	pDCWT2 FPKM	pDCKO Average FPKM	pDCWT Average FPKM
'Fhad1'	7.8189	1.347e-05	0.44	0.59	0	0	0.515	0
'Podxl'	6.89856	1.62594e-08	1.49	0.73	0.01	0.01	1.11	0.01
'Ffar1'	6.68715	3.49013e-08	6.25	5.4	0.06	0.06	5.825	0.06
'Wfdc18'	6.5765	0.00227354	1.27	2.1	0	0	1.685	0
'Ccr1'	6.5286	1.35663e-31	16.8	28.15	0.23	0.31	22.475	0.27
'Ffar2'	6.46521	2.78464e-30	9.89	11.53	0.1	0.2	10.71	0.15
'Hepacam2'	5.96138	0.00210713	0.69	0.76	0.03	0	0.725	0.015
'D630039A03Rik'	5.89702	0.0181349	0.15	0.22	0	0	0.185	0
'Raet1d'	5.89142	0.0179387	0.46	0.47	0	0.04	0.465	0.02
'Zfp366'	5.8476	2.78495e-08	1.44	1.66	0.02	0.04	1.55	0.03
'8030474K03Rik'	5.73631	0.0270824	0.42	0.32	0	0	0.37	0
'Dcstamp'	5.65531	0.0330882	0.28	0.23	0	0	0.255	0
'Matn1'	5.43596	0.000121422	0.85	1.3	0	0.06	1.075	0.03
'Bmp2'	5.33846	0.000174804	0.55	0.64	0.03	0	0.595	0.015
'B4galnt4'	5.31779	3.83616e-06	0.68	1.21	0.02	0.04	0.945	0.03
'Togaram2'	5.2955	0.0136206	0.34	0.31	0.02	0	0.325	0.01
'Cyp2s1'	5.06684	1.98052e-05	0.93	0.97	0.06	0	0.95	0.03
'Siglecf'	5.04111	1.35412e-39	7.82	10.28	0.29	0.34	9.05	0.315
'Ildr1'	4.91462	0.00148811	0.48	0.79	0.05	0	0.635	0.025
'Nccrp1'	4.91268	7.01691e-17	4.91	6.87	0.14	0.29	5.89	0.215
'Gcsam'	4.89046	0.0375833	0.16	0.31	0	0.02	0.235	0.01
'Gcnt2'	4.84601	1.89133e-146	43.83	56.55	2.22	1.56	50.19	1.89
'Cd22'	4.82808	0	180.19	188.89	7.63	6.58	184.54	7.105
'Batf3'	4.7947	3.08449e-08	4.84	7.17	0.08	0.4	6.005	0.24
'Cd80'	4.72599	9.95497e-12	2.26	4.1	0.06	0.14	3.18	0.1
'Crtac1'	4.67964	0.00303443	0.52	0.45	0.02	0.02	0.485	0.02
'Tmem51'	4.6198	1.26097e-32	8.62	12.24	0.51	0.45	10.43	0.48
'Gm4779'	4.58258	0.000330757	0.87	0.71	0.03	0.05	0.79	0.04
'Ifitm6'	4.43627	1.03678e-30	34.95	67.06	3.08	2.15	51.005	2.615
'Abca1'	4.34138	2.47244e-102	6.37	5.95	0.36	0.31	6.16	0.335
'Cfap45'	4.29944	0.00036599	0.93	1.22	0	0.12	1.075	0.06
'Lrrc32'	4.2689	0.00171886	0.38	0.37	0.01	0.03	0.375	0.02
'Trpm2'	4.25879	1.11981e-26	3.4	7.83	0.38	0.25	5.615	0.315
'Cphx1'	4.20306	0.00519637	0.35	1.32	0.08	0.05	0.835	0.065
'Poll'	4.17158	5.0914e-24	5.46	7.12	0.51	0.26	6.29	0.385
'Snx24'	4.16536	0.0193236	0.55	0.36	0.03	0.03	0.455	0.03
'Dbn1'	4.15044	5.37184e-09	1.25	2.06	0.13	0.08	1.655	0.105
'Prss39'	4.1294	0.000509975	1.28	1.54	0.09	0.09	1.41	0.09
'Klrb1f'	4.1185	1.63469e-130	40.96	43.72	3.04	3.06	42.34	3.05
'Calm4'	4.10717	5.2806e-15	8.55	8.77	0.61	0.54	8.66	0.575
'Chn2'	4.10424	1.05132e-25	4.92	8.07	0.58	0.28	6.495	0.43
'Gimap7'	4.04834	3.32591e-18	7.17	8.55	0.56	0.48	7.86	0.52
'Acvrl1'	4.02181	8.88676e-63	12.54	16.36	1.11	0.87	14.45	0.99
'Adam8'	4.01109	4.90459e-25	4.12	5.77	0.31	0.37	4.945	0.34
'Neurl3'	3.99216	7.4039e-74	21.84	28.52	1.57	1.93	25.18	1.75
'Itgam'	3.9885	8.85205e-31	43.81	54.98	4.08	2.8	49.395	3.44
'Klk1b11'	3.98162	2.13023e-13	7.72	9.09	0.61	0.59	8.405	0.6
'Cfh'	3.98001	2.28867e-32	4.05	4.68	0.35	0.27	4.365	0.31
'Gm2808'	3.97391	0.0103953	0.15	0.24	0	0.03	0.195	0.015
'Cd226'	3.94417	2.0303e-08	1.16	1.38	0.07	0.07	1.27	0.07
'Lingo2'	3.94211	0.0126561	0.08	0.15	0	0.02	0.115	0.01
'Tjp1'	3.91667	1.00336e-08	0.71	0.66	0.07	0.03	0.685	0.05
'Mmp28'	3.88239	7.46563e-06	0.84	0.84	0.11	0.04	0.84	0.075
'Wfdc17'	3.86347	3.73289e-27	35.31	54.73	3.22	3.64	45.02	3.43
'Irf6'	3.83221	1.43292e-15	1.83	2.58	0.18	0.16	2.205	0.17
'Gm11545'	3.8298	0.0118534	0.36	0.42	0.04	0.02	0.39	0.03
'Spint1'	3.81623	6.14262e-05	0.91	1.24	0.12	0.05	1.075	0.085
'Exoc3l2'	3.78836	0.0186035	0.25	0.25	0	0.04	0.25	0.02
'LOC105244034'	3.7869	4.77423e-17	3.23	4.45	0.33	0.29	3.84	0.31
'Tspan8'	3.76931	0.0294392	1.63	0.22	0.09	0.05	0.925	0.07
'Tbkbp1'	3.76757	2.03508e-42	8.01	11.6	0.92	0.68	9.805	0.8
'Hivep2'	3.75308	8.0073e-67	4.54	4.53	0.41	0.34	4.535	0.375
'Rab7b'	3.75136	1.29763e-38	5.54	7.69	0.59	0.5	6.615	0.545
'Tmprss4'	3.75101	0.0155593	0.5	0.47	0.05	0.03	0.485	0.04
'Ptgdr2'	3.7477	0.0044872	0.61	0.99	0.08	0.08	0.8	0.08
'Tpcn1'	3.719	2.26542e-177	109.55	133.34	10.16	10.14	121.445	10.15
'Tbx21'	3.71896	0.0193647	0.28	0.49	0.02	0.04	0.385	0.03
'Mt2'	3.7026	1.15328e-07	11.35	5.94	0.52	0.94	8.645	0.73
'Aif1'	3.66686	2.26426e-30	21.67	30.58	2.3	2.26	26.125	2.28
'St3gal5'	3.64375	9.49857e-47	13.93	13.88	1.44	1.06	13.905	1.25
'Tmem150b'	3.6279	2.52418e-07	2.56	3.4	0.22	0.32	2.98	0.27
'Car2'	3.62304	9.17018e-06	103.63	36.07	4.79	7.56	69.85	6.175
'Ccr6'	3.62288	2.19818e-19	7.61	13.79	1.16	1.27	10.7	1.215
'Tlr1'	3.62164	3.13978e-13	2.35	3.63	0.16	0.34	2.99	0.25
'Tex14'	3.61505	3.4258e-06	0.65	0.91	0.08	0.06	0.78	0.07
'Pdlim7'	3.58836	4.13126e-26	11.82	17.02	1.49	1.2	14.42	1.345
'Depp1'	3.5655	0.000155981	2.06	1.58	0.08	0.25	1.82	0.165
'Id2'	3.55555	6.24998e-15	59.55	102.68	7.54	7.77	81.115	7.655
'Cd33'	3.48279	2.03931e-101	65.66	85.34	7.41	7.57	75.5	7.49
'Atp1b2'	3.47312	1.34813e-12	6.71	2.36	0.44	0.45	4.535	0.445
'Snx21'	3.47275	2.59286e-44	25.62	38.31	2.48	2.71	31.965	2.595
'Zbtb46'	3.46376	3.22053e-38	8.87	11.97	1.46	1.23	10.42	1.345
'Gpr15'	3.44818	0.000697056	1.54	1.44	0.17	0.13	1.49	0.15
'Lta'	3.44679	4.71039e-12	4.8	8.07	0.48	0.84	6.435	0.66
'Ccr7'	3.43705	5.80702e-45	16.34	18.3	2.01	1.54	17.32	1.775
'Il1r1'	3.4161	5.87088e-06	0.55	1.03	0.11	0.06	0.79	0.085
'Gm42368'	3.40449	1.76578e-29	6.05	6.59	0.52	0.81	6.32	0.665
'Ifitm1'	3.39818	6.00278e-17	16.41	23.85	2.35	2.37	20.13	2.36
'Cd6'	3.39582	5.81289e-20	5.43	10.89	1.03	0.74	8.16	0.885
'Sema4a'	3.39306	7.56771e-85	45.11	56.48	5.96	4.63	50.795	5.295
'Adgrg5'	3.38723	7.39614e-68	25.1	32.42	2.81	3.31	28.76	3.06
'Lfng'	3.3799	1.00446e-26	8.49	12.47	1.29	0.94	10.48	1.115
'Cdkn1a'	3.37404	8.53008e-61	30.35	39.61	3.62	3.84	34.98	3.73
'Col4a5'	3.37369	0.00226596	0.4	0.16	0.03	0.03	0.28	0.03
'Lrrk2'	3.37256	9.8461e-54	4.32	4.37	0.4	0.36	4.345	0.38
'Prrt2'	3.31996	1.43238e-26	6.98	9.54	0.88	0.96	8.26	0.92
'Fam78b'	3.30802	0.00674644	0.17	0.39	0.03	0.03	0.28	0.03
'Egr3'	3.3059	4.01958e-15	2.3	3.34	0.37	0.27	2.82	0.32
'S1pr1'	3.29503	1.96251e-06	0.9	2.44	0.21	0.16	1.67	0.185
'Rnf150'	3.28047	2.59852e-23	1.75	2.34	0.29	0.18	2.045	0.235
'AF529169'	3.27055	0.000103994	0.33	0.42	0.04	0.06	0.375	0.05
'Grifin'	3.26081	0.000183717	2.67	7.55	0.85	0.54	5.11	0.695
'Pth1r'	3.25851	9.27846e-06	1.3	1.92	0.13	0.25	1.61	0.19
'Pygm'	3.24568	5.83731e-27	6.86	8.02	1.04	0.69	7.44	0.865
'Tmem40'	3.21401	5.75824e-05	2.13	2.11	0.21	0.29	2.12	0.25
'Pilrb1'	3.20568	5.08671e-08	3.53	4.91	0.76	0.39	4.22	0.575
'Rab30'	3.17406	2.7465e-28	9.72	15	1.78	1.49	12.36	1.635
'Palld'	3.17092	1.31061e-79	16.15	15.78	1.97	1.94	15.965	1.955
'Sstr4'	3.15876	0.0241048	0.95	0.67	0.16	0.04	0.81	0.1
'Tspan33'	3.14311	9.07102e-18	6	5.88	0.68	0.8	5.94	0.74
'Tmem273'	3.12682	0.000740901	1.45	1.52	0.12	0.26	1.485	0.19
'Ltb'	3.10004	9.46337e-34	26.48	35.88	3.79	4.25	31.18	4.02
'Myo1d'	3.09272	7.22887e-05	0.9	0.5	0.07	0.11	0.7	0.09
'Tbxas1'	3.07688	3.37428e-10	3.16	5.89	0.7	0.54	4.525	0.62
'Pik3r6'	3.06236	2.40029e-19	4.19	5.68	0.71	0.65	4.935	0.68
'Hist1h2br'	3.05572	0.000394816	1.21	4.48	0.3	0.21	2.845	0.255
'Hif3a'	3.05171	0.00419768	0.29	0.19	0.03	0.03	0.24	0.03
'Il1b'	3.02138	3.743e-05	2.04	2.72	0.42	0.17	2.38	0.295
'Btnl2'	3.02063	0.0356027	0.29	0.48	0.07	0.06	0.385	0.065
'Rnf43'	3.01972	0.00043788	0.5	0.57	0.11	0.05	0.535	0.08
'Card10'	3.01128	0.005067	0.32	0.35	0.06	0.03	0.335	0.045
'Il12rb1'	3.00857	2.03763e-23	6.95	8	0.76	1.19	7.475	0.975
'Ckb'	2.98804	1.47326e-18	9.44	14.39	1.63	1.69	11.915	1.66
'Irgc1'	2.97622	8.92612e-09	3.14	3.5	0.43	0.48	3.32	0.455
'Serpinb9'	2.97279	1.42539e-19	6.84	6.16	0.61	1	6.5	0.805
'Igfbp4'	2.96526	2.23785e-87	46.61	41.61	6.16	6.27	44.11	6.215
'Sec16b'	2.9633	5.78586e-05	0.65	0.85	0.12	0.09	0.75	0.105
'Kcnd1'	2.96275	5.92936e-07	1.09	1.32	0.2	0.14	1.205	0.17
'Esr1'	2.95907	2.13519e-13	4.12	3.94	0.4	0.28	4.03	0.34
'Ccl5'	2.95771	6.09153e-09	11.25	24.48	2.16	2.95	17.865	2.555
'Mefv'	2.95188	3.90186e-12	2.57	4	0.44	0.46	3.285	0.45
'Add2'	2.94343	4.73002e-07	1.95	0.87	0.19	0.24	1.41	0.215
'Btnl9'	2.9434	0.0180238	0.38	0.7	0.11	0.04	0.54	0.075
'F2r'	2.9411	3.7582e-07	1.5	1.39	0.16	0.25	1.445	0.205
'Serpinb6b'	2.93641	4.89058e-44	23.5	22.97	2.83	3.88	23.235	3.355
'Krt18'	2.93566	0.00399793	1.18	1.29	0.2	0.16	1.235	0.18
'Rnf144b'	2.93113	8.57281e-21	3.81	4.54	0.74	0.47	4.175	0.605
'Car1'	2.92267	1.6993e-40	34.5	27.83	4.29	4.77	31.165	4.53
'Fut7'	2.91694	1.62264e-35	21.92	29.64	4.17	3.37	25.78	3.77
'Rgs3'	2.90755	1.77441e-27	8.85	11.54	1.78	1.18	10.195	1.48
'Lrrc25'	2.90526	4.22364e-43	35.1	44.35	6.1	5.61	39.725	5.855
'Nlrp3'	2.87224	1.17506e-60	17.39	18.82	3	2.45	18.105	2.725
'Gpr141'	2.86397	4.78677e-16	3.93	6.72	0.91	0.72	5.325	0.815
'Hemgn'	2.84692	5.62127e-24	10.68	7.95	1.3	1.55	9.315	1.425
'Adora3'	2.83272	1.22555e-09	2.67	3.89	0.56	0.47	3.28	0.515
'Hmcn2'	2.82633	0.000742467	0.13	0.21	0.02	0.03	0.17	0.025
'Ptpn22'	2.82596	9.36384e-32	12	17.33	2.31	2.28	14.665	2.295
'Slc26a9'	2.82056	1.75566e-08	1.36	2.53	0.31	0.31	1.945	0.31
'Cd5'	2.81273	2.9667e-31	14.28	17.94	2.75	2.32	16.11	2.535
'Ryr1'	2.81264	4.89291e-43	4.55	6.38	0.86	0.87	5.465	0.865
'Sytl3'	2.8079	1.11141e-08	2.36	4.33	0.58	0.46	3.345	0.52
'Tspoap1'	2.80611	1.00227e-44	5.76	5.64	0.91	0.77	5.7	0.84
'Trpv4'	2.80482	5.16823e-10	2.5	2.13	0.39	0.32	2.315	0.355
'Klf5'	2.80467	0.0163769	0.63	0.97	0.09	0.16	0.8	0.125
'Hist1h2bb'	2.8019	0.0142925	2.75	3.28	0.57	0.55	3.015	0.56
'6430531B16Rik'	2.79839	0.0453477	0.7	1.29	0.15	0.18	0.995	0.165
'Ptprv'	2.78593	2.0308e-06	0.67	0.77	0.11	0.12	0.72	0.115
'Acot1'	2.77228	0.012616	0.72	1.28	0.19	0.18	1	0.185
'Sphk1'	2.76699	0.000384232	2.25	0.95	0.22	0.4	1.6	0.31
'H2-Ob'	2.75908	2.65628e-54	33.75	42.67	6.75	5.56	38.21	6.155
'Gm40378'	2.75266	0.0489773	0.98	0.99	0.24	0.15	0.985	0.195
'Clec1a'	2.74464	7.5488e-16	3.96	4.45	0.58	0.82	4.205	0.7
'Nid2'	2.73785	0.00733669	0.31	0.36	0.06	0.06	0.335	0.06
'Dock5'	2.7337	5.2468e-17	1.89	2.84	0.53	0.31	2.365	0.42
'Dpep2'	2.7308	2.17069e-07	2.74	4.38	0.59	0.59	3.56	0.59
'Abcg4'	2.72707	0.00805461	1.03	0.21	0.1	0.09	0.62	0.095
'Ccdc155'	2.72446	0.0475902	0.29	0.73	0.15	0.07	0.51	0.11
'Ddit4'	2.7237	9.01349e-07	92.78	182.73	24.13	22.2	137.755	23.165
'Gpr55'	2.7227	3.94162e-17	6.21	5.02	1.03	0.86	5.615	0.945
'Lilr4b'	2.72245	4.38511e-05	2.52	2.72	0.4	0.41	2.62	0.405
'Capn3'	2.70757	9.95872e-08	1.73	2.89	0.42	0.38	2.31	0.4
'Gucy2c'	2.70587	0.00805177	0.55	0.37	0.04	0.11	0.46	0.075
'Cass4'	2.70192	1.11617e-40	10.43	9.91	1.74	1.72	10.17	1.73
'Fgl2'	2.69759	1.65696e-28	6.58	6.51	1.08	1.15	6.545	1.115
'Styxl1'	2.69544	0.0179226	1.02	1.33	0.37	0.04	1.175	0.205
'Gata1'	2.69201	5.87466e-06	5.06	1.8	0.54	0.61	3.43	0.575
'Slc4a8'	2.69091	9.5065e-10	0.69	1.52	0.21	0.17	1.105	0.19
'Ptchd1'	2.67885	0.00274424	0.39	0.5	0.05	0.14	0.445	0.095
'Osgin1'	2.6573	0.00142563	0.93	1.51	0.19	0.25	1.22	0.22
'Gm4969'	2.64683	0.0279917	0.61	0.4	0.11	0.11	0.505	0.11
'Nefh'	2.64054	0.0130117	0.35	0.42	0.08	0.05	0.385	0.065
'Lpcat4'	2.63013	1.01541e-15	8.76	15.25	2.32	1.98	12.005	2.15
'Ccl3'	2.63	7.91045e-10	148.46	247.58	33.6	37.47	198.02	35.535
'Sag'	2.62711	0.000407406	1.19	1.27	0.16	0.07	1.23	0.115
'Clec12b'	2.62657	1.47248e-08	3.72	3.5	0.56	0.78	3.61	0.67
'Tns4'	2.62633	6.96936e-07	0.96	1.48	0.22	0.22	1.22	0.22
'Lpcat2'	2.61716	1.18922e-17	8.5	9.03	1.9	1.28	8.765	1.59
'Asns'	2.61444	2.10593e-05	4.25	2.14	0.28	0.86	3.195	0.57
'Drc7'	2.61145	1.39188e-11	3.86	5.05	0.86	0.64	4.455	0.75
'Kit'	2.60585	1.57094e-39	8.52	9.77	1.77	1.54	9.145	1.655
'Axl'	2.60348	9.56379e-27	6.9	7.9	1.11	1.55	7.4	1.33
'Epb41l3'	2.60132	1.94897e-06	1.28	1.07	0.22	0.2	1.175	0.21
'Nlrc4'	2.59185	2.72986e-15	3.22	4.31	0.73	0.57	3.765	0.65
'Gm46290'	2.59156	9.18569e-08	2.56	3.87	0.47	0.74	3.215	0.605
'Aqp1'	2.57998	0.000497649	11.65	4.84	1.2	1.81	8.245	1.505
'Gm550'	2.57193	0.0251762	1.05	1.09	0.14	0.19	1.07	0.165
'Tagap'	2.56899	5.80223e-133	323.61	351.71	63.87	61.46	337.66	62.665
'Jdp2'	2.56412	4.44103e-14	7.65	10.01	1.83	1.39	8.83	1.61
'Myc'	2.55821	8.41705e-35	14.55	14.96	2.63	2.9	14.755	2.765
'Arhgef40'	2.55628	7.06027e-09	1.6	1.37	0.38	0.21	1.485	0.295
'Misp'	2.55122	0.0130042	0.62	0.68	0.11	0.14	0.65	0.125
'Naaladl1'	2.54889	0.00450853	1.1	1.11	0.34	0.07	1.105	0.205
'Cela1'	2.54866	0.0414923	1.25	0.9	0.2	0.2	1.075	0.2
'M1ap'	2.53652	0.00208559	2.04	1.98	0.39	0.39	2.01	0.39
'Tfr2'	2.51691	0.000106074	1.87	0.92	0.22	0.3	1.395	0.26
'Dna2'	2.51413	4.16309e-29	9.02	11.39	2.23	1.72	10.205	1.975
'Tnfrsf13c'	2.49888	3.67462e-35	39.86	58.23	10.01	9.24	49.045	9.625
'Parvb'	2.49686	4.92555e-17	4.82	7.31	1.17	1.21	6.065	1.19
'Ssc4d'	2.49302	0.000727245	0.8	1.74	0.2	0.3	1.27	0.25
'2900026A02Rik'	2.48561	2.98301e-06	0.89	1.13	0.26	0.13	1.01	0.195
'Rhag'	2.48457	9.98259e-08	4.05	2.5	0.73	0.55	3.275	0.64
'Hist1h3d'	2.48197	0.019852	2.49	5.71	1.34	0.4	4.1	0.87
'Syngap1'	2.47761	1.10927e-17	3.68	4.42	0.97	0.59	4.05	0.78
'Ebi3'	2.47599	1.36147e-34	39.53	49.14	9	9.19	44.335	9.095
'Rasgef1b'	2.45293	7.00913e-13	3.84	5.09	0.96	0.84	4.465	0.9
'Hcar2'	2.45234	0.0115032	0.79	1.03	0.17	0.2	0.91	0.185
'Ank1'	2.42211	4.07563e-07	2.51	0.81	0.31	0.38	1.66	0.345
'Hist1h3g'	2.41777	0.0468542	2.52	2.76	0.6	0.5	2.64	0.55
'Atp7b'	2.41328	0.00501887	0.67	0.43	0.06	0.21	0.55	0.135
'Smpdl3a'	2.41184	5.26892e-53	60.32	73.28	13.36	14.37	66.8	13.865
'Gm41885'	2.41161	8.67472e-07	417.49	696.35	119.44	152.8	556.92	136.12
'Slamf8'	2.40607	1.78404e-06	3.02	3.07	0.85	0.45	3.045	0.65
'Rab37'	2.40423	4.91261e-25	12.83	15.96	3.1	2.84	14.395	2.97
'Cd83'	2.39714	1.39614e-06	2.55	2.83	0.64	0.49	2.69	0.565
'Klf1'	2.39442	5.84118e-05	6.8	2.24	0.79	1.09	4.52	0.94
'Pak1'	2.38996	1.78525e-29	16.95	20.05	4.6	3.19	18.5	3.895
'Atp4a'	2.38735	1.32506e-07	1.84	2.23	0.5	0.36	2.035	0.43
'Kif17'	2.37455	1.43086e-06	1.37	1.97	0.44	0.32	1.67	0.38
'Epb41l4b'	2.37187	2.98607e-24	10.59	10.3	2.66	1.88	10.445	2.27
'Ggn'	2.36068	0.000851356	1.21	1.43	0.43	0.23	1.32	0.33
'Acpp'	2.35734	0.0300673	0.24	0.45	0.08	0.06	0.345	0.07
'Ifitm2'	2.35544	1.83575e-22	59.35	89.91	16.51	15.84	74.63	16.175
'Il1r2'	2.35319	0.00198047	1.64	2.07	0.46	0.3	1.855	0.38
'Lgals3'	2.35074	5.73328e-08	96.76	154.39	30.37	24.18	125.575	27.275
'Ccnf'	2.34262	3.44004e-54	30.69	34.24	7.4	6.7	32.465	7.05
'Paqr4'	2.33536	1.31817e-06	2.2	3.15	0.56	0.68	2.675	0.62
'Slamf7'	2.33143	2.28168e-34	13.7	16.11	3.27	3.52	14.905	3.395
'Tbc1d9'	2.32068	4.87621e-19	3.81	5.11	0.92	1.05	4.46	0.985
'Acp5'	2.31959	7.23952e-32	27.49	30.43	6.11	6.49	28.96	6.3
'Ubash3b'	2.31038	5.91007e-25	6.87	8.24	1.84	1.58	7.555	1.71
'Hpn'	2.3103	0.0112285	1.39	0.87	0.25	0.25	1.13	0.25
'Hist1h1d'	2.30808	0.0236094	2.22	2.13	0.43	0.59	2.175	0.51
'Gm40498'	2.30478	0.011465	33.6	20.94	8.93	3.15	27.27	6.04
'Kif20a'	2.30098	5.14349e-57	34.13	39.36	8.15	8.32	36.745	8.235
'Cd9'	2.29562	5.07515e-21	19.66	22.65	4.59	4.93	21.155	4.76
'Dmc1'	2.28775	2.11321e-06	2.64	3.72	0.76	0.87	3.18	0.815
'Gm42078'	2.28544	1.33925e-59	107.39	103.14	23.82	23.74	105.265	23.78
'Hist1h1a'	2.28318	0.0362575	2.19	2.18	0.23	0.77	2.185	0.5
'Serpina3g'	2.28252	6.88548e-25	16.06	19.82	4.01	4.16	17.94	4.085
'Acsl3'	2.2767	8.67393e-09	2.32	2.05	0.52	0.5	2.185	0.51
'Trem1'	2.27384	0.00420211	0.71	1.04	0.25	0.16	0.875	0.205
'Ccnd2'	2.27201	4.54854e-67	22.41	23.92	5.36	5.15	23.165	5.255
'Il4i1'	2.26932	4.11365e-12	5.96	6.93	1.33	1.62	6.445	1.475
'P2rx1'	2.26677	0.00586341	0.87	1.08	0.15	0.29	0.975	0.22
'Cish'	2.26133	0.0006696	1.14	1.08	0.31	0.21	1.11	0.26
'Cpne5'	2.25578	0.00415516	1.3	1.13	0.21	0.32	1.215	0.265
'Bex6'	2.25387	1.04311e-45	77.4	80.2	19.57	16.84	78.8	18.205
'Lamb2'	2.24808	0.00494375	0.35	0.52	0.11	0.1	0.435	0.105
'Spred3'	2.23616	3.83732e-12	5.18	6.75	1.53	1.81	5.965	1.67
'Aurka'	2.23143	4.47904e-53	46.68	48.53	11.61	10.78	47.605	11.195
'Pklr'	2.22672	0.000393457	2.84	1.08	0.33	0.58	1.96	0.455
'Tiam1'	2.22395	2.55363e-26	5.48	6.85	1.77	1.41	6.165	1.59
'Col11a2'	2.2239	1.36254e-22	4.58	5.4	1.16	1.22	4.99	1.19
'Kcnn4'	2.21083	4.01497e-39	53.76	70.71	14.63	15.07	62.235	14.85
'Muc1'	2.20986	0.000199918	1.6	1.98	0.41	0.44	1.79	0.425
'Cit'	2.19281	5.26804e-56	13.91	13.87	3.58	3.11	13.89	3.345
'Sh3bp1'	2.18487	3.42537e-07	61.53	98.42	21.21	17.67	79.975	19.44
'Kcnip3'	2.18377	2.88333e-05	1.38	1.9	0.38	0.48	1.64	0.43
'Clec9a'	2.18298	2.83157e-107	207.5	196.27	46.34	51.2	201.885	48.77
'Kif23'	2.18278	2.64453e-73	89.66	90.61	23.49	19.95	90.135	21.72
'Gm15448'	2.18148	2.3713e-20	10.99	11.96	2.6	2.98	11.475	2.79
'Sptb'	2.18121	0.000214506	0.99	0.33	0.13	0.18	0.66	0.155
'Xkr5'	2.17543	2.2832e-07	2.36	2.72	0.56	0.71	2.54	0.635
'Faah'	2.16836	6.71469e-10	4.17	8.59	1.3	1.76	6.38	1.53
'C1qtnf6'	2.16553	0.00162754	1.28	1.24	0.32	0.32	1.26	0.32
'Il18rap'	2.15779	9.76999e-08	2.05	2.41	0.61	0.52	2.23	0.565
'L1cam'	2.15685	4.46488e-31	24.91	31.25	8.16	5.78	28.08	6.97
'Rom1'	2.15423	1.02107e-15	18.24	28.57	5.14	6.52	23.405	5.83
'Gm33370'	2.14992	9.69372e-06	5.44	7.09	0.7	1.01	6.265	0.855
'Ltb4r1'	2.12481	0.000857905	2.57	2.2	0.79	0.44	2.385	0.615
'Bcl6'	2.114	1.65245e-26	16.13	20.84	5.18	4.29	18.485	4.735
'Dok3'	2.11396	2.7827e-11	13.35	23.05	5.5	3.52	18.2	4.51
'Gprc5a'	2.10838	0.0234814	0.79	0.97	0.24	0.21	0.88	0.225
'Gstm1'	2.09705	5.18221e-29	58.89	41.88	12.62	13.37	50.385	12.995
'Evi2'	2.09152	7.3225e-05	8.95	15.51	3.65	2.71	12.23	3.18
'Zfp239'	2.07864	0.0449993	0.6	0.59	0.21	0.1	0.595	0.155
'Ncapd2'	2.07113	8.5202e-76	105.41	112.23	29.87	26.96	108.82	28.415
'Nfe2'	2.06857	3.14514e-10	7.32	9.91	2.33	2.39	8.615	2.36
'Clec2f'	2.06634	3.69204e-06	6.81	5.69	1.37	1.75	6.25	1.56
'Tal1'	2.0662	0.000870346	2	0.73	0.27	0.45	1.365	0.36
'Gm46403'	2.06329	1.25159e-53	293.19	331.17	79.89	64.96	312.18	72.425
'Pglyrp2'	2.0629	7.66725e-06	2.15	2.94	0.65	0.8	2.545	0.725
'Lsr'	2.05551	9.74373e-06	2.75	3.18	0.83	0.79	2.965	0.81
'Rasal1'	2.0508	2.1806e-09	3.16	3.82	0.89	0.95	3.49	0.92
'Fmnl3'	2.04008	6.69951e-32	12.98	14.74	3.68	3.74	13.86	3.71
'Hist1h2bg'	2.03726	2.38998e-11	31.44	37.18	8.45	10.03	34.31	9.24
'Mt1'	2.03555	3.70564e-06	16.46	12.21	3.18	4.61	14.335	3.895
'BC030867'	2.02751	5.66929e-15	7.83	8.62	2.65	2.33	8.225	2.49
'Tmem116'	2.02691	0.0109446	2.09	1.77	0.55	0.49	1.93	0.52
'Myl6b'	2.0264	1.15688e-08	8.63	10.46	2.49	2.5	9.545	2.495
'Ier3'	2.01712	9.05216e-07	6.77	10.25	2.29	2.37	8.51	2.33
'Nrm'	2.01326	1.91309e-38	103.16	131.72	33	31.3	117.44	32.15
'Fam129b'	2.00494	5.64815e-24	10.86	12.92	3.46	3.08	11.89	3.27
'Cd300lg'	2.0032	4.56526e-12	6.81	8.29	2.68	1.88	7.55	2.28
'Tnfaip2'	2.00225	5.61592e-10	5	3.58	1.34	0.97	4.29	1.155
'E2f8'	1.99802	7.30719e-43	39.19	45.07	12.59	10.86	42.13	11.725
'Wdhd1'	1.99769	1.12867e-37	15.65	14.58	4.32	4.03	15.115	4.175
'Tm6sf1'	1.99467	8.51952e-36	49.48	58.19	16.19	14.49	53.835	15.34
'Ces2g'	1.99207	0.00042173	4.43	1.6	0.75	0.99	3.015	0.87
'Cst7'	1.98852	1.79969e-08	11.74	19.94	4.45	4.4	15.84	4.425
'Nyap1'	1.98772	0.000257329	1.39	1.21	0.41	0.32	1.3	0.365
'Sh3bgrl2'	1.98732	0.0112182	0.56	0.89	0.2	0.2	0.725	0.2
'Nhsl2'	1.98217	3.1916e-11	1.13	1.26	0.35	0.32	1.195	0.335
'Atp8b4'	1.98193	1.13438e-27	8.91	10.03	2.78	2.51	9.47	2.645
'Ccdc180'	1.98164	2.55783e-05	1.07	1.49	0.32	0.39	1.28	0.355
'Chst11'	1.9795	5.47292e-28	8.08	8.51	2.19	2.47	8.295	2.33
'Trerf1'	1.97054	1.20404e-37	15.79	18.96	4.79	4.19	17.375	4.49
'Ksr1'	1.96131	2.81795e-05	0.97	0.96	0.27	0.3	0.965	0.285
'Dhrs3'	1.96114	1.14926e-08	7.03	11.25	2.6	2.36	9.14	2.48
'Camkk1'	1.95978	2.12911e-12	4.68	4.55	1.38	1.24	4.615	1.31
'Spta1'	1.95716	0.0154805	0.65	0.21	0.08	0.17	0.43	0.125
'Top2a'	1.95392	1.40851e-95	157.48	143.79	43.61	41.93	150.635	42.77
'Alox5'	1.94896	0.0217067	0.5	1.64	0.27	0.35	1.07	0.31
'Rab11fip4'	1.9445	1.24784e-12	2.38	2.97	0.75	0.78	2.675	0.765
'Apobr'	1.94238	7.6646e-21	12.04	15.15	4.21	3.66	13.595	3.935
'Lmna'	1.93704	3.31153e-06	5.37	3.23	1.09	1.19	4.3	1.14
'Pmaip1'	1.93671	3.21502e-75	139.65	140.41	41.8	38.82	140.03	40.31
'Mki67'	1.93637	1.32785e-75	112.01	110.65	34.31	29.88	111.33	32.095
'Aldh1a1'	1.93591	0.0489773	1.74	0.56	0.2	0.46	1.15	0.33
'Fanca'	1.93303	3.29189e-21	8.93	10.24	3.1	2.45	9.585	2.775
'Hdgfl3'	1.924	1.18291e-10	2.45	2.99	0.88	0.71	2.72	0.795
'Hist1h2bc'	1.91985	4.18246e-09	25.76	47.54	11.98	9.61	36.65	10.795
'Troap'	1.90962	6.55346e-25	21.77	22.94	7.38	5.86	22.355	6.62
'Amz1'	1.90697	9.39873e-10	5.16	5.96	1.9	1.37	5.56	1.635
'Itga4'	1.9068	9.58739e-91	165.56	172.02	48.81	50.46	168.79	49.635
'Cenpe'	1.90464	9.92507e-54	16.32	15.77	4.68	4.76	16.045	4.72
'Fam111a'	1.89885	1.38063e-50	39.3	40.48	11.9	11.66	39.89	11.78
'St3gal2'	1.89364	1.01916e-26	21.65	28.92	7.78	7	25.285	7.39
'Gm14434'	1.89197	7.62649e-06	3.41	1.6	0.82	0.67	2.505	0.745
'Slc12a3'	1.89164	1.16074e-05	1.99	2.74	0.61	0.8	2.365	0.705
'Il21r'	1.89047	1.00054e-61	80.14	78.75	25.03	25.98	79.445	25.505
'Stil'	1.88869	3.40337e-26	12.02	13.6	4.42	3.63	12.81	4.025
'Vwf'	1.88674	0.00703596	0.46	0.28	0.13	0.08	0.37	0.105
'Egr1'	1.88633	2.176e-25	29.92	41.37	10.4	10.93	35.645	10.665
'Ubxn11'	1.8854	0.000161514	3.54	3.21	1.18	0.86	3.375	1.02
'Ccne1'	1.88499	6.81658e-16	11.89	12	3.71	3.42	11.945	3.565
'Cldn13'	1.88345	0.0341147	3.84	1.29	0.52	1	2.565	0.76
'Esco2'	1.88329	5.30201e-28	18.53	16.61	4.9	5.59	17.57	5.245
'Myo1g'	1.88159	1.27331e-44	125.86	151.19	44.12	38.77	138.525	41.445
'Serpinf1'	1.88127	1.0358e-15	23.24	34.09	8.89	8.33	28.665	8.61
'Adam6b'	1.88021	0.00351686	1.69	1.32	0.5	0.39	1.505	0.445
'Cdt1'	1.87986	5.58542e-37	38.35	41.33	12.42	11.45	39.84	11.935
'H2-Eb2'	1.87742	0.00714573	1.02	1.47	0.34	0.27	1.245	0.305
'Eps8'	1.87098	7.81212e-05	1.3	2.21	0.55	0.52	1.755	0.535
'Gm40991'	1.86805	4.58151e-08	225.49	283.71	63.83	90.46	254.6	77.145
'Il18r1'	1.86752	0.000399041	1.04	1.76	0.38	0.46	1.4	0.42
'Lilrb4a'	1.86607	6.86807e-16	14.4	17.2	4.75	5.02	15.8	4.885
'Rap1gap2'	1.86598	2.47964e-51	28.76	29.22	9.28	8.23	28.99	8.755
'Pdcd1'	1.86596	0.0376887	0.91	1.07	0.28	0.32	0.99	0.3
'Polq'	1.8642	4.59397e-21	4.38	3.95	1.28	1.3	4.165	1.29
'Pla2g4c'	1.86411	0.0491982	0.61	0.38	0.16	0.16	0.495	0.16
'Ckap2l'	1.86342	7.60714e-40	28.26	29.67	8.56	8.99	28.965	8.775
'Apold1'	1.8631	0.0234525	0.68	0.64	0.2	0.2	0.66	0.2
'H2-DMb2'	1.85712	1.34719e-21	68.42	89.51	22.93	25.27	78.965	24.1
'Il10ra'	1.85073	2.91072e-65	152.32	167.09	48.69	49.02	159.705	48.855
'Brca1'	1.84362	3.5913e-27	8.84	8.13	2.62	2.85	8.485	2.735
'Ptk7'	1.8419	0.023315	0.5	0.54	0.17	0.16	0.52	0.165
'Abcg1'	1.84166	1.37773e-41	22.39	25.34	7.2	7.5	23.865	7.35
'Cdca5'	1.84144	5.3378e-29	30.36	30.64	9.96	8.79	30.5	9.375
'Kel'	1.839	0.0145636	2.62	1.03	0.54	0.53	1.825	0.535
'Col23a1'	1.83425	1.39838e-21	6.53	7.91	2.3	2.18	7.22	2.24
'Gm40595'	1.83277	2.98927e-19	20.75	22.34	6.37	7.01	21.545	6.69
'Nsl1'	1.83246	5.62073e-20	13.36	11.82	4.14	3.52	12.59	3.83
'Il2rb'	1.83208	4.10123e-05	1.64	2.34	0.64	0.63	1.99	0.635
'S100a4'	1.83156	2.43354e-11	46.06	71.28	18.64	17.94	58.67	18.29
'Gm46894'	1.82834	7.56167e-37	3310.79	4250.55	1064.94	1319.44	3780.67	1192.19
'Gm7694'	1.82527	2.70279e-21	11.84	14.6	4.23	3.84	13.22	4.035
'Btnl10'	1.81834	0.0183204	1.18	0.64	0.21	0.3	0.91	0.255
'Lst1'	1.81801	4.08433e-07	23.58	26.77	7.76	8	25.175	7.88
'Ptpn7'	1.81366	9.03754e-21	12.52	13.29	4.5	3.63	12.905	4.065
'Plk1'	1.81227	1.72917e-34	41.76	44.58	14.5	12.6	43.17	13.55
'Gimap4'	1.80938	0.0033297	1.78	3.38	1.11	0.61	2.58	0.86
'Kifc1'	1.80874	4.95372e-37	41.76	41.25	14.28	12.01	41.505	13.145
'Gm46257'	1.80832	2.56228e-25	90.79	94.8	30.02	28.47	92.795	29.245
'Fignl1'	1.80719	1.11166e-16	9.49	9.36	3.1	2.84	9.425	2.97
'Zwilch'	1.80666	5.10612e-22	14.37	13.54	4.11	4.68	13.955	4.395
'Parp10'	1.80575	3.80646e-16	9.28	8.78	3.21	2.47	9.03	2.84
'Mastl'	1.80395	2.54042e-14	5.27	4.63	1.68	1.55	4.95	1.615
'Aox2'	1.80212	9.32434e-19	6.59	6.08	2.01	1.99	6.335	2
'E2f2'	1.80047	2.00447e-27	13.51	15.21	4.89	4.22	14.36	4.555
'Flna'	1.80041	1.23087e-53	136.78	146.49	48.82	41.37	141.635	45.095
'Ier2'	1.79691	8.24245e-26	119.01	161.89	48.54	40.85	140.45	44.695
'Scnn1a'	1.79563	0.0016272	1.71	1.25	0.46	0.45	1.48	0.455
'Lcp2'	1.79421	4.6808e-29	25.93	30.97	8.51	9.61	28.45	9.06
'Rab38'	1.79387	0.0179973	1.39	1.9	0.49	0.56	1.645	0.525
'Cdc6'	1.78706	4.81988e-24	17.8	17.25	5.56	5.18	17.525	5.37
'Aurkb'	1.78192	2.60345e-31	49.53	54.75	18.36	15.32	52.14	16.84
'Kif22'	1.78088	2.2197e-36	45.36	49.34	15.38	15.05	47.35	15.215
'Plbd1'	1.77888	6.16237e-14	18.77	28.32	8.03	7.15	23.545	7.59
'Nos1ap'	1.77667	6.97438e-13	5.42	5.74	1.87	1.29	5.58	1.58
'Eme1'	1.77659	8.31249e-12	8.07	8.46	2.74	2.93	8.265	2.835
'Tk1'	1.77422	2.56748e-32	66.15	73.02	21.85	24.2	69.585	23.025
'Ticrr'	1.77066	1.30179e-27	8.21	8.69	2.87	2.59	8.45	2.73
'Dkkl1'	1.76995	0.000174804	6.1	8.9	2	2.84	7.5	2.42
'Mxd3'	1.76962	9.15465e-20	29.53	33.93	10.69	9.82	31.73	10.255
'Mcm10'	1.76766	3.85098e-20	9.74	9.24	2.97	2.81	9.49	2.89
'Ralb'	1.7671	2.75264e-05	3.08	4.12	1.24	1.05	3.6	1.145
'Ptpn3'	1.76229	1.55782e-13	3.4	3.51	1.05	1.19	3.455	1.12
'E2f7'	1.75971	3.34032e-20	6.44	6.51	2.06	2.15	6.475	2.105
'Cep55'	1.75559	7.23952e-32	29.19	26.83	9.58	9.01	28.01	9.295
'Pheta2'	1.74987	0.00038377	1.89	2.26	0.79	0.57	2.075	0.68
'Rad18'	1.74987	1.04201e-10	6.5	6.09	2	2.14	6.295	2.07
'Gm40814'	1.74817	0.0283091	17.14	10.12	2.74	6.17	13.63	4.455
'Nxpe2'	1.74731	3.64522e-10	5.77	7.21	2.26	2.51	6.49	2.385
'Spag5'	1.74708	5.34987e-40	32.39	30.39	10.01	9.48	31.39	9.745
'Atp2b4'	1.74619	3.80311e-42	71.9	55.47	22.12	19.66	63.685	20.89
'H2afx'	1.74605	3.41277e-38	282.1	332.41	108.97	93.25	307.255	101.11
'Kif18b'	1.74589	6.29876e-29	22.38	25.32	8.13	7.52	23.85	7.825
'Gm42052'	1.74487	2.29122e-11	22.87	28.95	8.75	8.4	25.91	8.575
'Stard10'	1.74427	5.58851e-12	15.41	14.93	4.84	5.37	15.17	5.105
'Gstp3'	1.74338	0.0038523	5.17	5.2	1.41	1.58	5.185	1.495
'Espl1'	1.74169	3.93471e-32	14.85	14.74	5.35	4.33	14.795	4.84
'Aunip'	1.74012	0.000192139	4.43	4.83	1.43	1.63	4.63	1.53
'Birc5'	1.7399	1.27947e-41	113.55	121.71	38.19	35.78	117.63	36.985
'Pole'	1.73981	2.06215e-24	12.78	11.83	4.68	3.43	12.305	4.055
'Btla'	1.73878	1.08292e-28	42.62	54.48	16.63	15.29	48.55	15.96
'Rnf223'	1.7362	0.00547225	0.72	0.82	0.3	0.22	0.77	0.26
'Kif15'	1.73551	2.85334e-39	22.21	20.72	7.19	7.68	21.465	7.435
'Mybl2'	1.7302	8.53666e-21	14.82	15.58	5.7	4.33	15.2	5.015
'Dusp3'	1.72916	4.92403e-07	2.38	2.96	0.92	0.92	2.67	0.92
'Chaf1a'	1.72737	1.28302e-28	20.97	20.99	7.48	6.48	20.98	6.98
'Nod2'	1.72068	8.95388e-09	3.32	2.75	1.08	0.94	3.035	1.01
'Mlkl'	1.71751	1.6805e-06	5.08	5.69	1.69	2.04	5.385	1.865
'Cd52'	1.71542	3.73817e-41	1031.79	1248.46	379.03	387.99	1140.12	383.51
'Ndc80'	1.71406	1.33494e-25	24.44	23.17	7.67	8.32	23.805	7.995
'Olr1'	1.71027	0.0328276	0.92	0.87	0.18	0.35	0.895	0.265
'Gm46221'	1.7097	0.00323331	2.11	1.89	0.47	0.89	2	0.68
'Mrvi1'	1.70863	0.0015799	0.87	0.69	0.25	0.27	0.78	0.26
'Pclaf'	1.70863	5.41921e-55	96.67	87.2	30.74	31.21	91.935	30.975
'Atad2'	1.70794	2.04142e-44	27.07	23.78	8.71	8.47	25.425	8.59
'H1fx'	1.70682	2.28229e-05	9.77	10.74	4.59	2.33	10.255	3.46
'Prr11'	1.70395	8.50697e-40	28.63	27.92	9.24	9.89	28.275	9.565
'Trim46'	1.70091	1.35907e-08	5.98	9.29	2.76	2.52	7.635	2.64
'Hist1h3c'	1.69621	0.0419855	5.09	5.68	1.11	2.69	5.385	1.9
'Slc9a5'	1.69603	5.3426e-07	2.8	2.97	0.88	1.22	2.885	1.05
'Stat4'	1.69557	4.07635e-15	10.3	11.84	3.94	3.62	11.07	3.78
'Rin3'	1.69369	2.97295e-25	56.2	73.07	24.4	19.94	64.635	22.17
'Ccr2'	1.69345	1.13118e-39	97.7	114.54	37.8	34.55	106.12	36.175
'Plxna1'	1.69156	0.000116889	0.7	0.8	0.3	0.22	0.75	0.26
'Vim'	1.68781	1.29763e-38	793.85	973.06	317.92	287.88	883.455	302.9
'Clspn'	1.68621	8.37371e-33	15.63	15.45	5.51	5.18	15.54	5.345
'F5'	1.68233	1.14424e-15	4.88	3.8	1.51	1.46	4.34	1.485
'Oas3'	1.68194	8.59034e-19	7.64	7.36	2.47	2.68	7.5	2.575
'Ccl6'	1.68081	1.1885e-09	16.62	27.37	7.61	7.59	21.995	7.6
'Slc34a1'	1.68051	0.0429747	1.04	1.82	0.74	0.3	1.43	0.52
'Palb2'	1.67965	4.24174e-08	3.72	4.3	1.64	1.27	4.01	1.455
'Cdca2'	1.67588	1.71203e-31	18.7	18.24	6.25	6.27	18.47	6.26
'Ermap'	1.67167	0.0265746	7.71	3.1	1.91	1.77	5.405	1.84
'Galnt6'	1.67025	1.09031e-13	5.78	7.84	2.5	2.23	6.81	2.365
'Myadm'	1.6677	1.84508e-41	91.05	98.42	34.99	30.46	94.735	32.725
'Rrm2'	1.66754	2.94891e-41	62.74	64.83	22.53	21.73	63.785	22.13
'LOC108167440'	1.66535	8.44813e-44	78.25	78.42	28.88	28.7	78.335	28.79
'Cdca8'	1.66489	6.42452e-30	52.32	56.99	19.67	18.35	54.655	19.01
'Snx10'	1.66416	5.13896e-19	19.57	22.72	7.87	6.75	21.145	7.31
'Hist1h4i'	1.66379	7.22887e-05	17.95	19.84	6.61	6.51	18.895	6.56
'Prss16'	1.6637	0.00852265	1.55	2.82	1.01	0.51	2.185	0.76
'Tubb5'	1.66029	1.87129e-61	571.36	612.03	210.26	202.65	591.695	206.455
'Rbm44'	1.65672	0.00466485	1.64	0.88	0.54	0.36	1.26	0.45
'Erf'	1.65579	9.21072e-13	8.97	12.15	4.03	3.38	10.56	3.705
'Dlgap5'	1.65557	4.97401e-32	29.05	26.44	9.18	9.74	27.745	9.46
'Als2cl'	1.65523	4.1241e-07	2.35	2.11	0.78	0.75	2.23	0.765
'Tacc3'	1.65518	4.27499e-42	56.97	56.38	20.17	19.7	56.675	19.935
'Kif14'	1.6547	1.91668e-18	6.9	6.12	2.54	1.94	6.51	2.24
'Fcgrt'	1.65302	3.26528e-17	34.71	48.15	15.11	14.1	41.43	14.605
'Bub1b'	1.65153	2.04713e-39	34.18	34.6	12.39	11.73	34.39	12.06
'Rad54l'	1.65074	3.82873e-17	8.7	8.95	3.13	2.73	8.825	2.93
'Spire1'	1.65053	0.013878	0.99	0.45	0.23	0.28	0.72	0.255
'Pask'	1.65022	4.38674e-10	3.35	3.29	1.14	1.19	3.32	1.165
'Incenp'	1.64607	1.20621e-36	68.73	77.88	27.71	24.41	73.305	26.06
'Spi1'	1.64444	3.08881e-05	118.31	176.21	58.11	46.4	147.26	52.255
'Cttn'	1.64057	0.00474827	1.45	1.09	0.45	0.44	1.27	0.445
'Gm43828'	1.63886	5.86548e-34	40.31	33.64	13.62	12.51	36.975	13.065
'Tmem238'	1.63783	0.0329941	2.11	2.67	0.84	0.86	2.39	0.85
'Selenbp1'	1.63626	3.38938e-05	4.72	4.42	1.65	1.64	4.57	1.645
'Kif4'	1.63535	4.43595e-26	14.62	14.69	4.79	5.12	14.655	4.955
'Ncapg'	1.63484	1.8326e-27	19.03	17.4	6.13	6.56	18.215	6.345
'Zfp971'	1.62972	1.46989e-18	18.56	14.38	9.15	9.53	16.47	9.34
'Gimap3'	1.62929	0.0316977	0.93	1.81	0.5	0.5	1.37	0.5
'Bcl3'	1.6291	5.57674e-25	48.4	57.73	19.73	18.09	53.065	18.91
'Grk3'	1.62626	2.30797e-45	27.59	27.01	9.96	9.36	27.3	9.66
'Gtse1'	1.62552	4.10487e-18	15.98	15.55	6.07	4.99	15.765	5.53
'Fcmr'	1.62528	2.56164e-05	5.42	7.5	2.54	2.09	6.46	2.315
'Cdc45'	1.62491	1.13715e-19	25.08	29.11	10.15	9.24	27.095	9.695
'Kntc1'	1.62468	1.49998e-22	9.25	9.23	3.47	3.4	9.24	3.435
'Pde1b'	1.62377	6.04741e-16	17.64	23.72	7.65	7.03	20.68	7.34
'Pimreg'	1.62233	1.92057e-19	30.34	31.36	11.69	10.41	30.85	11.05
'Tle6'	1.62008	0.00224178	2.17	2.64	0.97	0.73	2.405	0.85
'Oip5'	1.61903	2.69286e-05	5.27	5.34	1.74	2.1	5.305	1.92
'Kif20b'	1.61873	6.13393e-29	15.98	14.95	5.27	5.75	15.465	5.51
'Rnf157'	1.61401	3.32743e-30	30.71	35.55	12.59	11.31	33.13	11.95
'Rab43'	1.61235	3.62732e-37	64.8	73.18	26.5	23.59	68.99	25.045
'Bace1'	1.61183	9.42362e-07	2.81	3.48	1.09	1.25	3.145	1.17
'Neil3'	1.60933	2.10374e-27	31.64	31.9	11.85	11.03	31.77	11.44
'Mtfr2'	1.60485	9.54834e-09	6.63	6.13	2.34	2.28	6.38	2.31
'Mettl27'	1.60392	0.00136147	1.91	1.92	0.84	0.6	1.915	0.72
'9930012K11Rik'	1.6025	0.034634	1.07	1.58	0.44	0.53	1.325	0.485
'Stag3'	1.60216	7.9539e-18	16.5	15.54	7.39	4.79	16.02	6.09
'Zfp119b'	1.60167	9.10991e-05	2.07	2.8	0.94	1.36	2.435	1.15
'Hells'	1.59779	4.00759e-22	17.42	15.32	4.95	6	16.37	5.475
'Rad54b'	1.59755	5.28989e-11	6.92	6.63	2.37	2.52	6.775	2.445
'Kif2c'	1.59546	2.12628e-17	13.44	15	5.19	5.2	14.22	5.195
'Ncaph'	1.5954	2.75034e-28	30.01	29.67	11.48	10.28	29.84	10.88
'Gm19345'	1.59027	0.00724283	4.46	3.39	1.44	1.48	3.925	1.46
'Nphp4'	1.58817	0.0106054	0.77	0.71	0.2	0.33	0.74	0.265
'Gm40525'	1.58748	4.64629e-45	1717.89	1762.65	710.44	615.7	1740.27	663.07
'March8'	1.58663	0.0463994	0.96	0.34	0.19	0.27	0.65	0.23
'Cnbd2'	1.58475	1.35148e-06	930.36	1272.42	367.02	453.58	1101.39	410.3
'Fads6'	1.57892	0.0350104	0.41	0.51	0.16	0.15	0.46	0.155
'Serpina3f'	1.578	0.0317833	1.03	1.8	0.42	0.67	1.415	0.545
'Metrnl'	1.57692	0.00717042	1.52	1.77	0.73	0.49	1.645	0.61
'Cdk1'	1.57556	1.26203e-26	23.59	23.38	8.68	8.68	23.485	8.68
'Atad5'	1.57379	4.58135e-18	7.14	6.5	2.78	2.59	6.82	2.685
'Exo1'	1.57332	7.93323e-08	4.35	4.42	1.78	1.37	4.385	1.575
'Vps37b'	1.57304	5.41719e-30	51.63	57.8	21.32	19.25	54.715	20.285
'Slc26a11'	1.57295	5.27247e-08	5.85	8.05	2.77	2.38	6.95	2.575
'Iqgap3'	1.57018	1.47537e-20	9.04	9.85	3.68	3.36	9.445	3.52
'Tubb6'	1.56676	0.00492996	2.45	2.31	0.91	0.86	2.38	0.885
'Dennd2c'	1.56352	0.000793697	1.31	1.33	0.46	0.55	1.32	0.505
'Mical1'	1.56316	8.18286e-29	38.84	45.74	16.17	15.01	42.29	15.59
'Tbc1d2'	1.56298	1.11848e-09	5.43	6.67	2.1	2.39	6.05	2.245
'Gpr68'	1.5628	0.000193707	2.13	3.42	0.98	1.1	2.775	1.04
'Sgo2a'	1.56243	1.17127e-17	8.28	7.61	2.63	2.9	7.945	2.765
'Limd2'	1.55882	1.7444e-05	121.69	185.18	59.15	54.29	153.435	56.72
'Gatm'	1.55797	2.05762e-05	3.83	3.74	1.52	1.31	3.785	1.415
'Ercc6l'	1.55151	4.71197e-11	5.38	5.13	2.12	1.82	5.255	1.97
'Efcab11'	1.54767	0.0021924	2.49	2.87	0.77	1.13	2.68	0.95
'Serpinb10'	1.54725	0.026402	0.77	1.22	0.51	0.35	0.995	0.43
'Tedc1'	1.54678	1.9124e-17	11.64	12.04	4.57	4.38	11.84	4.475
'Lig1'	1.54468	2.22656e-32	34.19	31.93	12.84	12.12	33.06	12.48
'Piezo1'	1.54383	2.72311e-29	21.91	24.4	9.49	8.52	23.155	9.005
'C130050O18Rik'	1.54034	0.00279898	1.91	3.08	0.93	0.89	2.495	0.91
'Kifc5b'	1.53893	1.00869e-11	9.45	9.06	3.77	3.25	9.255	3.51
'Hfe'	1.53787	4.55776e-12	9.48	11.15	3.88	3.87	10.315	3.875
'Samd14'	1.53716	0.00161805	1.99	1.4	0.58	0.73	1.695	0.655
'Anxa1'	1.53708	9.38613e-06	7.69	10.22	2.88	3.95	8.955	3.415
'Mis18bp1'	1.53473	3.77471e-20	13.01	13.78	4.81	5.38	13.395	5.095
'Thbs3'	1.53391	0.0376136	0.78	0.86	0.24	0.33	0.82	0.285
'Prelid2'	1.53193	0.0058801	5.53	6.58	2.26	2.37	6.055	2.315
'Gm46918'	1.53151	9.2283e-24	84.46	77.57	33.3	28.38	81.015	30.84
'Knl1'	1.52835	2.34459e-19	10.55	7.97	3.45	3.59	9.26	3.52
'Pcgf2'	1.52612	0.000392735	2.34	4	1.24	1.26	3.17	1.25
'Tnf'	1.52468	3.12612e-12	19.69	22.44	6.95	9.23	21.065	8.09
'Specc1'	1.52462	7.44271e-06	1.59	1.5	0.64	0.55	1.545	0.595
'Degs2'	1.52459	7.01486e-08	4.8	5.72	2.19	1.84	5.26	2.015
'Gm46294'	1.52112	0.0162682	1.6	1.73	0.84	0.67	1.665	0.755
'Rnf144a'	1.51818	5.68434e-26	14.89	13.88	5.75	5.32	14.385	5.535
'Asf1b'	1.51634	2.48292e-19	38.34	45.11	15.42	16.8	41.725	16.11
'Depdc1b'	1.51517	4.30316e-09	7.49	7.51	3.2	2.59	7.5	2.895
'Mst1'	1.51465	0.00360561	2.52	2.01	0.97	0.97	2.265	0.97
'Anxa6'	1.51459	1.03678e-30	242.62	295.33	107.84	99.33	268.975	103.585
'Cdc14a'	1.51191	3.86477e-24	18.69	18.78	7.13	6.83	18.735	6.98
'Adamtsl4'	1.51054	0.0108822	1.21	1.18	0.45	0.54	1.195	0.495
'Gfi1b'	1.51045	0.0449683	2.13	1.12	0.57	0.64	1.625	0.605
'Fsbp'	1.50885	0.000790317	1.48	1.41	0.68	0.45	1.445	0.565
'Poc1a'	1.50763	3.47783e-11	13.89	15.85	5.86	5.68	14.87	5.77
'Ccl4'	1.50697	4.9009e-27	437.73	536.45	178.16	200.98	487.09	189.57
'Kif11'	1.50465	1.7192e-43	52.3	47.4	19.86	18.81	49.85	19.335
'Zfp473'	1.50275	0.00497523	1.08	1.39	0.54	0.43	1.235	0.485
'Gm39972'	1.50222	1.34205e-57	352.72	327.69	134.81	130.94	340.205	132.875
'Tmem38a'	1.49957	0.0036836	2.26	2.92	1.17	0.76	2.59	0.965
'Brca2'	1.49843	1.82347e-15	3.35	3.11	1.28	1.22	3.23	1.25
'Pkmyt1'	1.49791	5.94941e-18	31.84	36.9	14.29	12.25	34.37	13.27
'Lcn2'	1.49718	0.0499953	2.36	5.02	1.25	1.66	3.69	1.455
'Tnfrsf26'	1.49595	0.000642935	2.08	3.09	1.11	0.92	2.585	1.015
'Treml4'	1.49557	0.0436424	1.87	2.62	1.36	0.42	2.245	0.89
'Hpgds'	1.4929	1.20203e-07	5.32	5	1.71	2.33	5.16	2.02
'Cdca3'	1.48941	6.39369e-19	59.92	77.34	26.3	27.6	68.63	26.95
'Mcm5'	1.48926	8.66118e-39	66.81	68.22	26.9	26.21	67.515	26.555
'Cdca4'	1.48867	1.59453e-19	28.75	30.95	11.06	13.33	29.85	12.195
'Cd34'	1.48668	8.27393e-06	4.05	4.85	1.81	1.67	4.45	1.74
'Tpx2'	1.48591	3.45629e-35	47.9	49.5	19.35	18.37	48.7	18.86
'Stk10'	1.46871	2.41107e-34	51.42	56.75	22.37	20.78	54.085	21.575
'Aifm2'	1.46786	0.0231929	1.26	1.25	0.56	0.45	1.255	0.505
'Cdkn3'	1.46756	2.43802e-08	22.59	29.18	10.31	10.5	25.885	10.405
'Cdc20'	1.46567	1.92568e-24	46.7	43.01	18.81	16.95	44.855	17.88
'Pira6'	1.46535	0.0340937	1.7	1.52	0.47	0.79	1.61	0.63
'Sgo1'	1.46492	5.68325e-15	9.9	9.32	3.8	3.89	9.61	3.845
'Etv5'	1.46479	2.66152e-15	10.86	9.35	3.8	4.23	10.105	4.015
'Mcl1'	1.45935	4.29617e-48	255.49	271.73	104.68	106.84	263.61	105.76
'Il6ra'	1.45541	1.47478e-23	47.82	53.66	22.45	18.37	50.74	20.41
'Lztfl1'	1.45341	3.6157e-18	14.49	16.72	6.62	6.13	15.605	6.375
'Loxl3'	1.45152	0.000943366	1.49	1.85	0.61	0.75	1.67	0.68
'Asap1'	1.44985	1.80888e-15	6.14	5.88	2.46	2.4	6.01	2.43
'Myh9'	1.44904	8.88149e-43	200.28	207.59	87.34	77.33	203.935	82.335
'Fbxo5'	1.44746	4.0266e-16	23	21.43	9.14	8.82	22.215	8.98
'Zbtb7b'	1.44706	6.48554e-15	21.83	29.49	11.37	9.62	25.66	10.495
'Pira2'	1.44699	4.16807e-22	26.16	32.54	13.21	12.33	29.35	12.77
'Nfix'	1.44392	3.38133e-06	2.14	2.32	0.95	0.85	2.23	0.9
'Uhrf1'	1.4434	6.52136e-33	36.51	34.53	14.27	14.47	35.52	14.37
'Tcf19'	1.44334	1.00787e-20	52.21	59.65	24.05	21.33	55.93	22.69
'Nrros'	1.44248	2.73236e-40	169.51	178.4	74.04	67.3	173.955	70.67
'Rasa3'	1.44241	1.66556e-41	137.56	143.51	59.71	54.31	140.535	57.01
'Pglyrp1'	1.4418	0.021692	6.4	9.99	4.82	1.85	8.195	3.335
'Efcab5'	1.44121	0.0415292	0.49	0.47	0.19	0.18	0.48	0.185
'1700025G04Rik'	1.43759	6.5696e-09	4.61	5.4	2.51	1.98	5.005	2.245
'Kctd14'	1.43649	1.36951e-18	25.4	26.47	9.83	10.09	25.935	9.96
'Lilra6'	1.43636	2.81391e-14	17.05	18.79	7.57	6.85	17.92	7.21
'Prc1'	1.43616	2.90837e-31	43.68	42.16	18.11	16.75	42.92	17.43
'Cenpf'	1.43608	3.3725e-29	12.54	10.68	4.55	4.73	11.61	4.64
'Ldlrap1'	1.436	7.1021e-07	4.54	4.78	2.23	1.58	4.66	1.905
'Cgas'	1.43503	3.37079e-12	7.73	7.21	3.25	2.99	7.47	3.12
'Wdr76'	1.43309	3.78102e-16	9.99	9.37	3.81	4.09	9.68	3.95
'Shtn1'	1.4284	2.31895e-08	5.12	6.77	2.51	2.34	5.945	2.425
'Ccdc102a'	1.42834	3.75032e-07	8.77	11.81	4.96	3.52	10.29	4.24
'Racgap1'	1.42701	4.37875e-37	94	96.24	40.78	37.22	95.12	39
'Cacna1s'	1.42589	0.0403003	0.79	0.61	0.26	0.3	0.7	0.28
'Arhgef18'	1.42141	7.8914e-26	28.99	32.69	13.34	12.08	30.84	12.71
'Tnfsf9'	1.41933	0.00308552	4.78	10.3	2.78	3.18	7.54	2.98
'Tjp3'	1.41817	3.08829e-15	17.55	20.27	8.59	7.21	18.91	7.9
'2810408A11Rik'	1.41783	0.00661362	2.49	2.93	1.1	1.12	2.71	1.11
'Cdc42ep4'	1.4149	0.0125242	1.42	1.28	0.61	0.52	1.35	0.565
'Gins1'	1.41318	1.32178e-05	10.01	11.47	4.54	4.29	10.74	4.415
'Gm46620'	1.41208	2.04001e-16	26.88	27.49	13.01	9.8	27.185	11.405
'Myo1f'	1.40888	1.96568e-30	67.01	72.32	30.75	27.11	69.665	28.93
'Ifi205'	1.40803	0.000109898	5.67	8.4	2.99	2.87	7.035	2.93
'Derl3'	1.4018	7.80028e-05	7.36	9.17	2.9	4.01	8.265	3.455
'Vcl'	1.40057	2.14902e-38	39.28	38.25	16.25	16.1	38.765	16.175
'Nkg7'	1.3994	0.000152132	10.63	12.74	5.24	4.54	11.685	4.89
'Aatk'	1.39852	0.0285758	0.54	0.84	0.28	0.26	0.69	0.27
'Nusap1'	1.39819	1.52136e-28	42.69	38.8	16.48	17.9	40.745	17.19
'Tspan4'	1.39542	0.0114673	3.11	3.6	1.65	1.18	3.355	1.415
'Ccnb2'	1.39494	1.83575e-22	58.38	64.7	26.08	25.55	61.54	25.815
'Mcm3'	1.39255	8.82086e-24	54.2	57.46	25.66	21.22	55.83	23.44
'Parpbp'	1.39214	9.5966e-10	7.74	7.08	2.68	2.9	7.41	2.79
'Cip2a'	1.39138	4.51216e-19	21.62	18.6	7.55	8.68	20.11	8.115
'Rcn3'	1.38952	7.01706e-09	19.61	25.42	10.64	8.37	22.515	9.505
'Dtl'	1.3884	8.02979e-17	11.57	11.12	4.98	4.58	11.345	4.78
'Nav1'	1.38789	7.05841e-08	2.07	3.07	1.11	0.93	2.57	1.02
'Fry'	1.38239	6.11284e-15	5.51	4.82	2.43	1.94	5.165	2.185
'Cdc25c'	1.38232	7.94345e-08	8.62	10.23	3.79	3.76	9.425	3.775
'Dusp2'	1.3815	2.17943e-12	25.85	32.86	12.32	12.58	29.355	12.45
'Ccna2'	1.37865	1.86361e-33	63.71	63.46	27.64	26.21	63.585	26.925
'Ovgp1'	1.37522	0.0187037	1.42	2.93	0.77	1.09	2.175	0.93
'Hspb6'	1.37521	3.46531e-07	12.96	16.33	6.61	5.85	14.645	6.23
'Acsf3'	1.3741	4.95424e-05	5.61	5.68	2.94	1.9	5.645	2.42
'Vasn'	1.37175	5.54059e-14	13.36	11.41	5.38	5.14	12.385	5.26
'Cenph'	1.37158	3.45539e-06	11.52	10.16	4.66	4.7	10.84	4.68
'Cenpn'	1.36984	3.18074e-09	15.18	16.99	7.78	5.97	16.085	6.875
'Pif1'	1.3692	1.95059e-11	7.72	7.49	3.42	2.91	7.605	3.165
'Tmem198b'	1.36573	1.59793e-08	9.67	9.99	4.72	3.56	9.83	4.14
'Ggt5'	1.36498	0.0440529	1.14	1.5	0.56	0.61	1.32	0.585
'S1pr2'	1.36372	0.00280374	1.99	2.15	0.95	0.84	2.07	0.895
'Scd2'	1.36221	4.12418e-37	99.75	95.01	44.39	39.03	97.38	41.71
'Arhgap22'	1.36195	5.78586e-05	4.53	6.07	2.44	2.23	5.3	2.335
'Wdr90'	1.36003	2.55663e-13	7.89	7.67	3.75	2.93	7.78	3.34
'Card9'	1.35785	1.31674e-08	16.18	22.28	9.22	7.39	19.23	8.305
'Phyhd1'	1.35706	3.79988e-06	11.45	15.85	6.2	6.02	13.65	6.11
'Notch2'	1.35491	2.61521e-38	53.01	53.96	24.15	21.94	53.485	23.045
'Tnni2'	1.35421	7.85853e-12	50.32	56.61	22.33	23.74	53.465	23.035
'Slpi'	1.35365	1.38552e-20	94.15	101.38	43.62	40.76	97.765	42.19
'Stkld1'	1.35112	0.032639	1.51	1.76	0.7	0.77	1.635	0.735
'Ltbp3'	1.35026	0.00478091	1.16	1.49	0.53	0.66	1.325	0.595
'Wdfy4'	1.35015	1.20234e-32	54.74	57.4	25.93	22.55	56.07	24.24
'Xrcc3'	1.34817	9.06518e-05	3.94	4.04	1.67	1.79	3.99	1.73
'Ppp1r18'	1.34807	1.73625e-24	129.32	152.33	66.2	59.26	140.825	62.73
'1700020L24Rik'	1.34805	0.0226467	3.36	4.88	1.81	1.8	4.12	1.805
'Dnmt1'	1.34648	1.6304e-35	54.5	51.24	23.95	21.96	52.87	22.955
'Rasgrp4'	1.34597	7.00665e-15	26	32.26	12.2	9.96	29.13	11.08
'Ceacam16'	1.34448	4.5965e-09	10.52	9.47	4.48	4.48	9.995	4.48
'Ncapg2'	1.34248	5.43787e-19	15.91	12.47	5.97	6.27	14.19	6.12
'Gm6377'	1.34126	1.00665e-05	5.52	4.41	1.9	2.41	4.965	2.155
'Tnnt3'	1.33852	0.00358953	5.11	6.51	2.9	2.08	5.81	2.49
'Plec'	1.33795	3.36419e-26	25.97	28.28	12.88	10.81	27.125	11.845
'Clnk'	1.33706	2.17965e-06	8.49	9.58	4.47	3.43	9.035	3.95
'Ska1'	1.33391	2.35709e-06	5.8	6.36	2.37	2.99	6.08	2.68
'Hk3'	1.33275	1.98702e-07	5.69	5.6	2.27	2.66	5.645	2.465
'Anln'	1.33211	2.41083e-17	13.37	11.75	5.4	5.56	12.56	5.48
'Gas2'	1.33189	0.0243786	1.43	1.34	0.53	0.72	1.385	0.625
'Prex1'	1.33135	4.14874e-29	66.13	72.44	32.22	28.52	69.285	30.37
'Rrm1'	1.33011	1.5261e-30	54.43	46.75	21.56	22.71	50.59	22.135
'Cdc25b'	1.32937	2.55002e-13	18.29	16.18	8.5	6.65	17.235	7.575
'Il4ra'	1.32783	1.92378e-35	72.71	75.89	33.39	33.5	74.3	33.445
'Fanci'	1.32742	2.37597e-07	4.4	3.64	1.68	1.87	4.02	1.775
'Nbeal2'	1.32679	4.66408e-24	19.6	21.85	9.59	8.63	20.725	9.11
'Lax1'	1.32527	0.000408779	3.67	5.29	1.89	2.19	4.48	2.04
'Marcksl1'	1.32441	1.38077e-06	11.85	17.14	6.67	6.13	14.495	6.4
'Cnr2'	1.32207	0.00170641	1.74	1.66	0.69	0.82	1.7	0.755
'Gm14548'	1.32195	2.20696e-18	60.2	66.42	30.92	24.75	63.31	27.835
'Ccne2'	1.32087	2.62034e-08	7.25	7.03	3.19	3.09	7.14	3.14
'Kif24'	1.3187	2.23572e-08	3.98	3.68	1.71	1.56	3.83	1.635
'Itih5'	1.31825	0.00895364	0.6	0.67	0.31	0.26	0.635	0.285
'Gpr4'	1.31647	7.10709e-07	8.35	10.76	4.73	3.95	9.555	4.34
'Plp2'	1.31484	7.82717e-19	531.14	696.22	287.41	258	613.68	272.705
'Lrr1'	1.31231	0.00882485	3.37	3.27	1.53	1.52	3.32	1.525
'Snai1'	1.31218	0.00391835	3.48	5.14	2.06	1.78	4.31	1.92
'Itga2b'	1.31179	0.0216676	1.4	1.03	0.6	0.48	1.215	0.54
'Nek2'	1.30684	2.73788e-17	23.72	20.72	10.59	9.14	22.22	9.865
'Lin54'	1.30567	1.91292e-16	14.26	12.06	5.67	6.02	13.16	5.845
'Hmmr'	1.30448	2.33184e-22	23.47	21.94	9.75	10.51	22.705	10.13
'Ube2c'	1.30215	4.14962e-19	137.3	164.68	68.73	66.55	150.99	67.64
'Haus5'	1.30193	1.19212e-15	24.93	26.69	11.98	11.1	25.81	11.54
'Ccnb1'	1.29956	8.87316e-17	28.8	27.42	11.53	13.63	28.11	12.58
'Rab11fip1'	1.29857	8.86661e-07	2.67	3.65	1.6	1.31	3.16	1.455
'Bard1'	1.29477	7.76785e-11	5.74	5.96	2.45	2.8	5.85	2.625
'Spry2'	1.29431	0.024843	1.68	3.49	1.26	1.09	2.585	1.175
'Icosl'	1.29402	5.91083e-14	28.54	36.57	15.22	14.12	32.555	14.67
'Nr4a1'	1.29339	2.329e-16	101.03	129.3	59.35	48.77	115.165	54.06
'Blm'	1.29317	2.69536e-10	8.05	6.79	3.05	3.62	7.42	3.335
'Tgtp1'	1.29312	0.0381799	1.58	2.45	0.51	1.32	2.015	0.915
'Treml2'	1.2925	2.61188e-22	54	64.77	27.37	26.83	59.385	27.1
'Tigit'	1.29242	0.00185428	9.97	8.18	3.08	5.15	9.075	4.115
'Bub1'	1.29206	4.41083e-16	12.44	11.4	5.3	5.41	11.92	5.355
'Rad51'	1.29122	2.69855e-09	13.26	12.55	5.2	6.42	12.905	5.81
'Tspan32'	1.28419	0.0403003	2.05	2.37	0.98	0.92	2.21	0.95
'Ecm1'	1.28397	0.0158328	2.19	2.69	0.95	1.25	2.44	1.1
'Egfl7'	1.28147	0.0189113	3.62	3.75	1.63	1.73	3.685	1.68
'Hnrnpll'	1.28082	0.0121872	2.43	1.38	0.89	0.85	1.905	0.87
'Iqsec1'	1.27976	3.46685e-30	42.84	45.36	20.45	19.36	44.1	19.905
'Tent5a'	1.2757	9.2253e-13	11.2	12.53	6.05	4.77	11.865	5.41
'Itga6'	1.27436	0.000351344	1.82	1.47	0.83	0.66	1.645	0.745
'Slc16a3'	1.27361	0.0101229	1.89	2.76	1.08	1.11	2.325	1.095
'Adora2a'	1.27319	1.99627e-12	21.89	27.37	11.62	10.99	24.63	11.305
'Aspm'	1.27184	2.38019e-13	10.22	7.68	4.51	3.88	8.95	4.195
'Glipr1'	1.27128	9.0731e-17	111.04	138.33	55.4	59.71	124.685	57.555
'Cdca7'	1.27122	4.98096e-10	13.64	13.24	6.43	5.81	13.44	6.12
'Stk38'	1.27013	1.29292e-29	100.6	108.19	48.02	47.07	104.395	47.545
'Akna'	1.2699	1.71986e-25	81.92	92.3	42.01	37.55	87.11	39.78
'Map3k20'	1.26978	0.00483734	1.28	1.05	0.46	0.54	1.165	0.5
'Hilpda'	1.26667	0.0226836	4.41	5.61	2.82	1.77	5.01	2.295
'Tle3'	1.26421	1.82849e-37	131.62	136.93	62	60.92	134.275	61.46
'Rad51ap1'	1.26273	8.79123e-10	16.36	16.5	7	8.11	16.43	7.555
'Dusp1'	1.2626	2.40599e-18	152.51	194.49	81.75	78.08	173.5	79.915
'Ston2'	1.2617	0.000198216	1.33	0.97	0.53	0.55	1.15	0.54
'Lpcat1'	1.25765	2.00913e-11	14.17	14.72	6.89	6.02	14.445	6.455
'Add3'	1.25762	5.07281e-16	21.24	24.22	11.21	9.62	22.73	10.415
'Fancb'	1.25712	0.0111226	1.89	2.49	0.95	1.12	2.19	1.035
'Cx3cr1'	1.25668	9.6502e-05	5.54	8.68	4.2	2.47	7.11	3.335
'Ttk'	1.25359	1.51488e-08	8.57	8.53	3.64	4.25	8.55	3.945
'Cpd'	1.25044	1.4463e-06	2.46	1.83	0.93	1.05	2.145	0.99
'AI467606'	1.25021	2.12784e-28	153.69	165.48	75.84	72.73	159.585	74.285
'Fancm'	1.24806	1.82515e-06	2.36	2.07	1.07	0.99	2.215	1.03
'Fam110a'	1.24694	2.40879e-14	36.68	35.86	17.8	15.08	36.27	16.44
'Unc119b'	1.2441	3.63025e-20	33.51	37.77	16.76	16.45	35.64	16.605
'Hist1h2ap'	1.24251	1.60325e-16	419.17	479.8	184.83	234.77	449.485	209.8
'Pou2f2'	1.23976	2.17526e-09	19.23	28.09	11.52	10.52	23.66	11.02
'Prr5l'	1.23958	4.31018e-08	7.4	6.56	3.72	2.79	6.98	3.255
'Slc8b1'	1.23887	4.28381e-30	90.03	88.92	39.91	43.22	89.475	41.565
'Unc119'	1.23669	2.84062e-13	59.02	74.11	30.61	29.48	66.565	30.045
'Card11'	1.23285	4.2625e-32	285.27	313.01	140.07	140.77	299.14	140.42
'Themis2'	1.23243	1.81384e-26	161.74	173.69	82.73	74.32	167.715	78.525
'Otulinl'	1.23119	7.9539e-18	45.71	49.84	23.33	22.13	47.775	22.73
'Nuf2'	1.23012	1.12515e-14	26.02	24.63	11.33	12.36	25.325	11.845
'Adcy6'	1.22945	0.00227344	1.18	1.32	0.64	0.56	1.25	0.6
'BC055324'	1.22944	1.21799e-05	4.02	3.93	1.82	1.77	3.975	1.795
'Ncapd3'	1.22888	6.27254e-28	34.62	32.99	16.48	15.76	33.805	16.12
'Diaph3'	1.22745	6.43963e-10	8.46	7.37	3.96	3.38	7.915	3.67
'Gm41291'	1.22521	0.0223998	3.52	4.6	2.33	1.55	4.06	1.94
'B4galnt2'	1.22345	0.0131692	1.64	1.52	0.65	0.87	1.58	0.76
'Tonsl'	1.21926	4.8247e-09	6.61	6.38	3.27	2.95	6.495	3.11
'Bin2'	1.21876	6.62473e-17	140.01	179.03	77.33	74.35	159.52	75.84
'Ddb2'	1.21844	2.19099e-06	9.65	12.23	5.36	5	10.94	5.18
'Pitpnc1'	1.21632	3.2399e-09	5.44	4.74	2.65	2.17	5.09	2.41
'Cenpk'	1.21532	0.00492155	5.93	6.09	2.93	2.58	6.01	2.755
'Rasa4'	1.21525	3.63025e-20	113.51	131.57	62.02	54.14	122.54	58.08
'Rfwd3'	1.21389	4.11922e-25	35.96	32	16.22	16.02	33.98	16.12
'Cenpm'	1.21368	1.5789e-06	21.13	24.61	11.23	10.01	22.87	10.62
'Laptm5'	1.21217	1.65245e-26	1949.05	2166.24	1041.35	923.63	2057.64	982.49
'Avpi1'	1.2116	0.0302601	3.94	6.96	2.51	2.71	5.45	2.61
'B430306N03Rik'	1.21057	8.07936e-17	27.64	31.62	13.72	14.57	29.63	14.145
'E2f3'	1.2104	1.7338e-11	7.92	7.99	3.98	3.79	7.955	3.885
'Nanos1'	1.21018	0.038237	0.94	1.07	0.52	0.43	1.005	0.475
'Plk4'	1.21002	6.76456e-10	9.3	8.61	4	4.55	8.955	4.275
'Kif9'	1.20977	2.15025e-09	9.21	9.68	4.46	4.54	9.445	4.5
'Tmem140'	1.20967	0.00649858	2.55	3.27	1.35	1.25	2.91	1.3
'Pqlc1'	1.20939	6.32579e-08	12.76	14.26	7.2	5.92	13.51	6.56
'Ampd3'	1.20902	8.18336e-13	14.36	15.32	7.37	6.91	14.84	7.14
'Cenpa'	1.20775	3.34032e-20	73.65	73.81	35.52	34.48	73.73	35
'Kpna2'	1.20639	3.40752e-24	64.58	61.26	29.98	30.07	62.92	30.025
'Nostrin'	1.20613	0.0147466	2.78	2.88	1.3	1.41	2.83	1.355
'Hemk1'	1.20495	0.000616248	6.16	5.89	2.79	3.18	6.025	2.985
'Pfkp'	1.20368	1.126e-17	43.19	54.07	23.02	25.33	48.63	24.175
'Dnajc28'	1.20224	0.00108526	2.47	2.48	1.16	1.23	2.475	1.195
'Topbp1'	1.20162	1.53809e-27	40.25	40.67	19.72	19.06	40.46	19.39
'Atp10a'	1.19981	8.98548e-08	4.7	4.97	2.65	2.1	4.835	2.375
'Kcnk12'	1.19929	0.000133964	7.83	7.58	4.47	2.92	7.705	3.695
'C1qtnf12'	1.196	0.00445584	11.01	5.42	3.75	4.09	8.215	3.92
'Sirt3'	1.19461	4.92943e-10	28.04	33.57	15.37	13.98	30.805	14.675
'Plekho2'	1.19318	1.67816e-20	39.34	43.35	20.04	19.09	41.345	19.565
'Cercam'	1.1929	1.75954e-07	9.56	11.92	5.27	5.38	10.74	5.325
'Mns1'	1.19274	5.21302e-05	11.22	7.53	3.85	5.19	9.375	4.52
'Gpr183'	1.19245	1.21606e-12	31.39	40.11	18.06	16.52	35.75	17.29
'Ulbp1'	1.19049	0.000415632	7.7	6.94	4.14	2.89	7.32	3.515
'Gata2'	1.1895	0.0436291	1.09	1.35	0.52	0.66	1.22	0.59
'Csf1r'	1.18787	1.64005e-06	11.49	14.29	7.72	4.79	12.89	6.255
'Spdl1'	1.1859	2.5259e-06	7.72	6.6	3.51	3.42	7.16	3.465
'Mapk11'	1.18483	0.00268995	3.05	4.32	1.87	1.71	3.685	1.79
'Dok2'	1.18463	0.0067873	2.43	2.72	1.28	1.05	2.575	1.165
'Papss2'	1.18435	0.0215391	1.36	1.31	0.59	0.7	1.335	0.645
'Cotl1'	1.18251	3.89944e-12	68.85	90.42	41.09	36.48	79.635	38.785
'Fam118a'	1.18111	0.0153586	2.36	1.81	0.94	1.02	2.085	0.98
'Lrrc8c'	1.18031	1.85282e-16	19.03	19.83	8.89	9.19	19.43	9.04
'Ngp'	1.18008	0.0272315	5	14.76	5.14	4.58	9.88	4.86
'Dclre1b'	1.1799	2.61264e-09	7.01	7.1	3.42	3.49	7.055	3.455
'Foxm1'	1.17713	1.59453e-19	49.93	51.86	27.07	22.55	50.895	24.81
'Bcl2'	1.17702	1.66051e-16	17.45	19.6	10.16	8.61	18.525	9.385
'Tbc1d31'	1.17683	5.35834e-14	13.31	13.94	6.62	6.94	13.625	6.78
'Cenpl'	1.17656	4.31103e-06	7.76	7.37	3.48	3.89	7.565	3.685
'Emilin2'	1.17574	0.000110219	3.58	5.16	2.25	2.05	4.37	2.15
'A430078G23Rik'	1.17545	5.14545e-08	10.24	10.38	5.66	4.42	10.31	5.04
'Lyl1'	1.17398	7.80349e-11	35.42	43.96	20.69	18.06	39.69	19.375
'Adap1'	1.17274	1.03156e-05	8.17	10.39	5.17	4.03	9.28	4.6
'Cntd1'	1.1719	0.0171257	2.37	2.43	1.03	1.31	2.4	1.17
'Zfand4'	1.17124	0.000787789	3.52	2.92	1.57	1.57	3.22	1.57
'Hrh2'	1.17065	2.38664e-08	8.81	11.79	5.69	5.26	10.3	5.475
'Lrrc8a'	1.17031	9.19544e-15	14.62	15.36	7.37	7.32	14.99	7.345
'Ccdc18'	1.16795	0.00090909	2.04	1.96	0.89	1.06	2	0.975
'Baiap2'	1.166	3.92226e-14	34.38	43.69	17.48	17.68	39.035	17.58
'Trip10'	1.1654	0.00512784	2.95	4.29	1.88	1.73	3.62	1.805
'Rcc1'	1.16226	7.40473e-12	20.2	18.66	9.12	9.97	19.43	9.545
'Nuak2'	1.16057	1.05597e-08	9.81	10.28	4.78	5.04	10.045	4.91
'Prkd2'	1.16009	7.2932e-11	22.49	29.9	14.01	12.38	26.195	13.195
'Susd3'	1.15861	0.000250898	11.96	16.63	8.03	6.17	14.295	7.1
'Gse1'	1.15818	1.99568e-17	17.62	18.39	9.45	8.37	18.005	8.91
'LOC100862473'	1.15763	0.00701259	2.91	3.4	1.72	1.41	3.155	1.565
'Rab3il1'	1.15471	0.000362949	5.2	5.26	2.87	2.18	5.23	2.525
'Dsn1'	1.15116	1.79305e-07	10.66	9.8	5.1	5.04	10.23	5.07
'Utp14b'	1.14674	0.032243	1.13	1.4	0.62	0.64	1.265	0.63
'Knstrn'	1.1463	1.52622e-16	38.71	41.33	19.68	18.8	40.02	19.24
'Cenpi'	1.14528	1.60042e-08	9.97	8.26	4.26	4.61	9.115	4.435
'Dscc1'	1.14506	0.0225674	3.31	4.2	1.82	2.05	3.755	1.935
'Tmem107'	1.1441	0.0412321	4.6	5.04	3.25	1.68	4.82	2.465
'Gpr157'	1.14287	4.27355e-08	7.23	6.24	2.99	3.73	6.735	3.36
'Gm4737'	1.14126	3.46476e-08	16.25	18	7.6	9.57	17.125	8.585
'Gm15246'	1.1379	5.15934e-05	4.51	4.75	2.56	2.23	4.63	2.395
'Smpd5'	1.13662	0.03103	2.41	2.71	1.26	1.33	2.56	1.295
'Ly6g5b'	1.13601	0.0362913	4.21	4.23	2.15	2.07	4.22	2.11
'March1'	1.13446	3.56113e-14	16.78	14.7	7.86	7.9	15.74	7.88
'Trpv2'	1.13403	3.24496e-17	80.64	94.87	45.81	42.24	87.755	44.025
'Arhgap33'	1.13298	1.50952e-10	14.44	17.7	8.49	7.71	16.07	8.1
'Elmo2'	1.13296	1.08388e-16	52.08	60.52	30.11	27.03	56.3	28.57
'Fam114a1'	1.13248	0.0202251	1.67	2.52	1.03	1.1	2.095	1.065
'Chtf18'	1.13217	8.4685e-06	6.94	7.65	4.21	3.13	7.295	3.67
'Ctsg'	1.13146	5.84391e-08	58.69	42.43	22.1	28.59	50.56	25.345
'Kif18a'	1.12884	1.14463e-05	5.79	4.92	2.49	2.9	5.355	2.695
'Rsrp1'	1.12746	2.16711e-13	186.44	246.77	107.96	111.32	216.605	109.64
'Col15a1'	1.12055	0.0370036	0.85	1	0.45	0.49	0.925	0.47
'Gm41844'	1.1193	7.40821e-20	102.42	98.18	54.02	47.69	100.3	50.855
'Mif4gd'	1.11812	1.20283e-08	25.25	29.64	13.17	14.68	27.445	13.925
'Orc1'	1.11601	0.0239866	1.89	1.49	0.79	0.83	1.69	0.81
'Zgrf1'	1.11587	3.9402e-06	2.94	2.91	1.62	1.62	2.925	1.62
'S100a10'	1.11557	1.80349e-14	174	204.53	97.21	95.28	189.265	96.245
'Traip'	1.11543	1.72137e-06	8.82	8.65	4.42	5.1	8.735	4.76
'Trim59'	1.11482	1.8346e-13	29.54	23.67	13.18	13.75	26.605	13.465
'Sass6'	1.11471	1.6823e-08	7.06	6.83	3.48	3.57	6.945	3.525
'Naif1'	1.1137	0.00598671	2.23	3.2	1.36	1.42	2.715	1.39
'Gm39701'	1.11285	3.06433e-19	39.02	38.83	20.04	19.63	38.925	19.835
'Smad7'	1.11264	1.55538e-21	61.8	67.67	34	32.54	64.735	33.27
'Plk3'	1.11202	2.39724e-05	6.97	8.25	3.93	3.86	7.61	3.895
'Csrp2'	1.11169	0.0465589	4.53	5.49	2.7	2.42	5.01	2.56
'Hist1h2ao'	1.11082	3.31228e-15	249.75	226.07	108.67	133.93	237.91	121.3
'Itgb7'	1.1108	1.37368e-22	304.29	330.68	171.42	152.85	317.485	162.135
'Chek1'	1.11038	4.97738e-05	4.66	4.31	2.14	2.45	4.485	2.295
'Sec31b'	1.10829	0.0143579	1.54	1.97	1.05	0.75	1.755	0.9
'Rhof'	1.10772	1.50857e-06	12.67	16.01	7.93	6.77	14.34	7.35
'Gm42267'	1.10617	1.51623e-10	102.61	128.52	65.7	52.9	115.565	59.3
'Vasp'	1.10593	4.3473e-18	99.67	113.56	56.53	52.78	106.615	54.655
'Lcp1'	1.10529	5.4772e-31	474.59	494.59	250.93	245.52	484.59	248.225
'Slc16a1'	1.10527	0.0335255	2.92	1.13	0.93	1.12	2.025	1.025
'Phf19'	1.10442	7.85163e-06	6.15	7.37	3.58	3.16	6.76	3.37
'Gm5431'	1.10397	0.000362803	4.7	4.1	1.96	2.56	4.4	2.26
'Zranb3'	1.1035	2.0308e-06	5.33	4.83	2.73	2.38	5.08	2.555
'Rad51b'	1.10321	0.000481605	6.8	9.82	4.32	4.44	8.31	4.38
'Mms22l'	1.10239	4.17069e-09	8.69	7.77	4.48	3.94	8.23	4.21
'Hspa1b'	1.10204	1.05324e-06	9.42	9	4.16	5.31	9.21	4.735
'Nicn1'	1.10154	0.00966391	3.01	3.63	1.66	1.76	3.32	1.71
'Gramd4'	1.09999	3.89816e-13	30.8	37.62	18.18	16.65	34.21	17.415
'Grap2'	1.09852	7.1927e-19	28.3	29.66	15.56	14.3	28.98	14.93
'Gm46223'	1.09665	5.46164e-07	12.14	11.57	6.47	5.74	11.855	6.105
'Mbtd1'	1.09657	1.18629e-18	27.64	23.62	12.88	13.31	25.63	13.095
'Fkbp5'	1.09606	0.0405538	37.47	63.68	23.89	28.61	50.575	26.25
'Cfp'	1.09532	7.90639e-20	289.1	334.82	161.59	160.79	311.96	161.19
'H1f0'	1.09511	3.62113e-12	36.24	43.66	20.81	20.5	39.95	20.655
'Atxn7l3'	1.09491	6.00029e-19	52.41	57.15	29.52	27.25	54.78	28.385
'Nlrp1b'	1.09184	0.00471887	1.53	1.16	0.72	0.59	1.345	0.655
'Rab44'	1.0914	6.38539e-05	6.04	4.23	2.41	3.02	5.135	2.715
'Kyat3'	1.08906	0.0169475	3.01	4.12	2	1.68	3.565	1.84
'Zfp36l1'	1.08863	4.68432e-15	434.17	557.24	263.5	251.76	495.705	257.63
'Samhd1'	1.08668	1.52781e-27	199.93	210.98	108.07	106.61	205.455	107.34
'Enkd1'	1.08633	2.75605e-05	14.39	18.01	8.18	8.49	16.2	8.335
'Evl'	1.08512	8.69263e-13	95.9	122.83	56.64	57.09	109.365	56.865
'Lmntd2'	1.08512	0.00819973	3.15	3.63	1.8	1.99	3.39	1.895
'Ptafr'	1.08411	7.67801e-11	12.78	11.9	6.52	6.31	12.34	6.415
'Arhgap4'	1.08387	1.0288e-15	103.92	125.93	63.82	58.71	114.925	61.265
'Ccdc34'	1.08326	4.23392e-06	10.49	10.8	5	6.35	10.645	5.675
'Supt4a'	1.08279	2.13192e-14	156.87	177.76	84.58	90.38	167.315	87.48
'Dnase1l3'	1.08164	8.25356e-08	10.3	8	4.5	4.88	9.15	4.69
'Pira1'	1.08112	9.47681e-05	9.24	13.56	7.12	4.72	11.4	5.92
'Chaf1b'	1.08081	1.0259e-05	10.29	12.06	5.7	5.96	11.175	5.83
'Akt3'	1.08013	7.83344e-16	18.49	19.83	10.73	9.67	19.16	10.2
'Gen1'	1.07993	3.21915e-07	6.75	6.42	3.12	3.56	6.585	3.34
'Msn'	1.07899	2.85099e-22	271.7	305.52	153.41	148.09	288.61	150.75
'Sla'	1.07868	5.1004e-22	129.38	138.26	68.51	72.8	133.82	70.655
'Klf10'	1.07813	6.40907e-08	13.22	16.97	7.98	7.68	15.095	7.83
'Ctc1'	1.07658	7.41305e-11	14.98	15.88	8.72	7.63	15.43	8.175
'Ms4a3'	1.07569	0.000724385	17.14	12.85	6.44	9.2	14.995	7.82
'Tbx6'	1.07491	0.000415632	7.73	10.01	5.01	4.3	8.87	4.655
'Stmn1'	1.07468	2.87351e-22	339.07	352.73	189.23	172.82	345.9	181.025
'Smc2'	1.07348	1.09842e-14	21.88	18.07	9.95	10.99	19.975	10.47
'Ager'	1.07232	0.0165924	4.25	6.55	3.03	2.66	5.4	2.845
'Haspin'	1.07147	8.58969e-05	5.5	5.35	2.99	2.7	5.425	2.845
'Dpcd'	1.06658	0.0183899	6.13	6.65	2.77	3.39	6.39	3.08
'Arhgap19'	1.06646	6.34656e-11	11.2	9.38	5.42	5.38	10.29	5.4
'Mcm4'	1.0655	6.62732e-18	33.32	30.58	16.38	17.23	31.95	16.805
'Rhobtb1'	1.06499	1.67529e-06	5.51	5.02	2.88	2.75	5.265	2.815
'Cenpp'	1.0635	0.0164978	5.99	5.11	2.97	3.3	5.55	3.135
'Pola1'	1.06264	1.64331e-08	8.12	6.55	3.95	3.83	7.335	3.89
'Zc3h6'	1.06062	5.15854e-06	4.24	4.69	2.38	2.33	4.465	2.355
'Mfsd13a'	1.06043	0.000167923	7.93	9.75	5.52	3.94	8.84	4.73
'Prag1'	1.05904	7.61798e-05	3.6	3.59	2.11	1.69	3.595	1.9
'Rara'	1.05886	1.96112e-11	42	54.07	26.46	23.65	48.035	25.055
'Tinf2'	1.05604	5.3042e-10	19.15	19.03	10.07	9.95	19.09	10.01
'Rbm38'	1.05564	9.81785e-15	207.92	254.44	127.32	118.22	231.18	122.77
'Ago2'	1.05396	1.35492e-11	11.73	10.62	6.58	5.26	11.175	5.92
'Gpr19'	1.05292	0.00561577	4.35	5.57	2.75	1.95	4.96	2.35
'Cntln'	1.05252	1.38729e-05	4.52	4.11	2.07	2.36	4.315	2.215
'Gk'	1.05212	0.000675664	3.4	2.91	1.64	1.73	3.155	1.685
'Mbp'	1.04971	1.54767e-19	32.24	29.47	16.62	16.16	30.855	16.39
'Adgra2'	1.04964	0.0141654	1.12	1.5	0.76	0.66	1.31	0.71
'Nup210l'	1.04914	0.0146898	0.96	1.19	0.43	0.58	1.075	0.505
'Gm43305'	1.04765	0.0321934	507.8	400.1	220.84	331.63	453.95	276.235
'Prim1'	1.04759	7.58107e-08	20.59	21.86	11.34	11.3	21.225	11.32
'Snap47'	1.047	0.0319882	3.06	2.72	1.37	1.66	2.89	1.515
'Nlrc3'	1.04675	0.00123671	1.34	1.61	0.83	0.66	1.475	0.745
'Gimap8'	1.04629	0.00767995	2.18	2.82	1.21	1.43	2.5	1.32
'Impa2'	1.04504	5.2178e-06	19.7	25.54	12.61	11.61	22.62	12.11
'Sapcd2'	1.04465	0.00257399	3.87	5.63	2.34	2.18	4.75	2.26
'Syt11'	1.0417	0.00051481	2.78	2.67	1.37	1.47	2.725	1.42
'Ckap2'	1.04122	5.36468e-07	10.31	9.89	5.34	5.47	10.1	5.405
'Lgmn'	1.03754	1.61975e-15	65.55	71.79	37.83	36.16	68.67	36.995
'Prkch'	1.03665	7.52302e-07	10.51	13.99	6.57	6.64	12.25	6.605
'Recql4'	1.03557	0.000147903	3.87	3.68	2.1	1.93	3.775	2.015
'Tube1'	1.03531	0.010318	2.46	2.66	1.33	1.38	2.56	1.355
'Junb'	1.03435	1.26207e-15	282.31	339.86	172.01	163.47	311.085	167.74
'Fam102a'	1.02985	4.04312e-05	4.91	6.37	3.18	2.93	5.64	3.055
'Rfc4'	1.0283	0.000187054	12.87	11.79	6.62	6.75	12.33	6.685
'Stard9'	1.0273	6.59761e-05	1.74	2.59	1.25	1.15	2.165	1.2
'Mylip'	1.02712	2.28254e-06	10.15	13.03	6.35	6.24	11.59	6.295
'Mybl1'	1.02678	0.0384258	1.09	0.99	0.68	0.46	1.04	0.57
'Plac8'	1.02303	2.1282e-19	2621.12	3005.48	1513.71	1563.35	2813.3	1538.53
'Mink1'	1.02283	1.39371e-11	65.92	86.48	42.76	40.29	76.2	41.525
'Gsr'	1.02052	1.03496e-10	27.35	25.87	12.96	15.95	26.61	14.455
'Ccrl2'	1.02038	0.041399	2.92	2.77	1.64	1.26	2.845	1.45
'Prickle3'	1.02028	2.20542e-08	20.57	24.81	12.1	12.45	22.69	12.275
'2610318N02Rik'	1.0201	0.00316975	7.74	8.99	4.63	4.46	8.365	4.545
'Wdfy1'	1.01905	3.83732e-12	18.66	18.16	8.75	9.68	18.41	9.215
'Wdr86'	1.019	0.00111915	3.29	2.73	1.21	1.27	3.01	1.24
'Ska3'	1.01869	1.39435e-06	14	13.39	6.53	8.42	13.695	7.475
'Mcm7'	1.0186	1.17036e-17	67.55	71.37	36.87	38.06	69.46	37.465
'Ankle1'	1.01831	7.84981e-07	10.57	11.52	6.35	5.85	11.045	6.1
'Gpr35'	1.01809	6.59631e-18	37.27	37.62	21.05	19.82	37.445	20.435
'Trip13'	1.01523	0.000320447	6.58	6.25	3.73	3.26	6.415	3.495
'Shcbp1'	1.01446	3.11198e-06	12.63	10.79	6.26	6.49	11.71	6.375
'Fkbpl'	1.01194	0.00770133	5.52	6.86	3.23	3.56	6.19	3.395
'Hspa8'	1.01189	1.01149e-19	1711.05	1941.64	970.14	1029.35	1826.35	999.745
'Mis12'	1.01175	4.90477e-08	13.44	13.87	7.2	7.89	13.655	7.545
'Lrp5'	1.01033	2.3974e-08	8.91	10.17	5.56	4.9	9.54	5.23
'Spc25'	1.0089	2.79466e-06	18.43	19.63	9.9	11.11	19.03	10.505
'BC049352'	1.00531	0.00153461	3.44	3.48	1.98	2.01	3.46	1.995
'Hirip3'	1.00435	5.74756e-09	19.37	20.05	11.04	10.3	19.71	10.67
'Mapk14'	1.004	5.34211e-22	97.3	100.79	54.37	54.92	99.045	54.645
'Stk24'	1.00285	4.7184e-13	102.06	124.21	64.39	58.17	113.135	61.28
'Bst1'	1.00231	0.00490538	3.92	4.2	2.23	2.17	4.06	2.2
'Irf2bpl'	1.00135	7.91005e-06	5.48	5.94	3.11	3.18	5.71	3.145
'Suv39h1'	1.00104	1.51117e-12	27.93	29.06	16.24	15.16	28.495	15.7
'B3gnt5'	1.00098	0.00197004	2.36	2.34	1.34	1.25	2.35	1.295
'Gpr137b'	-1.00089	4.08783e-15	38.39	31.03	75.98	73.68	34.71	74.83
'Bloc1s1'	-1.0017	2.64998e-08	37.57	39.16	80.79	88.6	38.365	84.695
'Cgnl1'	-1.0021	2.48028e-05	1.55	1.87	3.89	3.66	1.71	3.775
'Atp5s'	-1.00268	0.0185065	2.09	1.92	4.4	4.5	2.005	4.45
'Trim3'	-1.0036	2.62928e-10	9.32	9.23	21.19	19.87	9.275	20.53
'Amigo1'	-1.00466	0.00427011	1.13	0.77	1.86	1.88	0.95	1.87
'Fam220a'	-1.00473	5.04124e-06	8.03	5.72	15.39	14.91	6.875	15.15
'Slc5a3'	-1.00573	0.00658333	0.53	0.35	0.96	0.98	0.44	0.97
'Rasgrf1'	-1.00608	0.0240654	0.47	0.53	1.18	1.06	0.5	1.12
'Scimp'	-1.00758	2.35939e-13	58.4	47.79	113	121.76	53.095	117.38
'Cox20'	-1.00844	0.000370919	21.74	16.48	49.88	36.6	19.11	43.24
'Magi3'	-1.00911	0.0385458	0.47	0.37	1.02	0.84	0.42	0.93
'Shb'	-1.00935	3.52027e-05	4.37	3.46	9.21	8.11	3.915	8.66
'Tmem205'	-1.00981	0.0355507	3.95	3	7.9	7.8	3.475	7.85
'Polm'	-1.0101	5.23371e-05	3.64	2.91	7.59	7	3.275	7.295
'Camsap2'	-1.01118	3.58657e-07	3.46	2.47	6.85	6.59	2.965	6.72
'Gtf3c6'	-1.0115	2.49598e-09	11.7	9.25	24.38	26.25	10.475	25.315
'Arl5a'	-1.01155	9.66495e-10	11.37	8.03	21.96	20.95	9.7	21.455
'Ostm1'	-1.0123	2.8406e-10	19.36	13.96	37.19	36.59	16.66	36.89
'Herc6'	-1.01518	5.51119e-06	4.97	3.13	9.22	8.71	4.05	8.965
'Stox2'	-1.01527	2.10334e-05	2.51	1.51	4.47	4.49	2.01	4.48
'Ctsl'	-1.01729	3.90087e-12	320.67	221.17	577.47	630.54	270.92	604.005
'Osbpl5'	-1.01737	0.024142	1.66	0.76	2.54	2.98	1.21	2.76
'Six5'	-1.0183	0.00411693	2.1	1.49	3.87	4.04	1.795	3.955
'Lpgat1'	-1.01978	1.23085e-11	16.81	12	31.14	30.79	14.405	30.965
'Smim5'	-1.01999	1.33663e-21	92.32	90.23	203.95	222.19	91.275	213.07
'Itgb1'	-1.02037	2.00181e-14	31	23.51	60.02	61.42	27.255	60.72
'1110008P14Rik'	-1.02083	6.35047e-06	18.74	22.8	47.54	45.53	20.77	46.535
'Qdpr'	-1.02112	1.55999e-09	21.4	16.93	43.02	42.46	19.165	42.74
'Tmem106c'	-1.02198	8.45161e-11	21.09	17.88	43.14	43.55	19.485	43.345
'Wfs1'	-1.02261	1.17185e-16	15.53	15.29	34.33	34.66	15.41	34.495
'Slc12a4'	-1.02586	2.6643e-07	4.41	3.94	9.97	8.73	4.175	9.35
'Slc44a1'	-1.02713	2.12597e-10	23.61	16.03	44.11	44.94	19.82	44.525
'Smim13'	-1.02865	4.0894e-06	3.12	2.44	6.26	6.19	2.78	6.225
'Kremen1'	-1.02868	8.05649e-07	4.86	3.6	9.09	9.06	4.23	9.075
'E130308A19Rik'	-1.03156	0.00577459	1.48	1.04	3.11	2.6	1.26	2.855
'Stk26'	-1.03445	1.30774e-07	12.3	8.26	21.08	25.05	10.28	23.065
'Gbp3'	-1.03492	0.00228702	2.22	1.74	4.5	4.37	1.98	4.435
'Fam43a'	-1.03522	2.65028e-08	19.63	12.58	36.67	35.67	16.105	36.17
'Dmwd'	-1.03729	1.16102e-05	3.98	3.85	8.62	9.08	3.915	8.85
'Abcd3'	-1.03841	5.96227e-05	2.9	2.29	6.05	5.67	2.595	5.86
'Eid1'	-1.04589	1.79405e-15	26.95	22.34	53.74	58.17	24.645	55.955
'Siglech'	-1.04639	8.52477e-27	944.98	854.97	1902.53	1951.06	899.975	1926.8
'Fnip2'	-1.0477	7.37154e-06	1.53	1.92	3.8	4.03	1.725	3.915
'Prkra'	-1.04813	2.47737e-06	6.99	7.28	16.04	16.2	7.135	16.12
'Aph1b'	-1.04937	0.00527382	0.98	0.81	1.86	2.22	0.895	2.04
'Tmem150a'	-1.05353	0.000286753	4.51	4.12	9.92	9.79	4.315	9.855
'Tox3'	-1.05389	0.0447513	0.83	0.65	1.91	1.46	0.74	1.685
'Ptgr1'	-1.05533	0.000921543	4.38	4.02	10.17	9.2	4.2	9.685
'Ier5l'	-1.05588	0.000381702	4.02	4.65	10.58	9.31	4.335	9.945
'Nbdy'	-1.05767	0.0480204	2.75	2.53	6.34	5.76	2.64	6.05
'Ifi213'	-1.0577	0.000151211	5.65	3.75	9.19	12.09	4.7	10.64
'Klhl42'	-1.05784	7.55953e-14	9.4	8.88	25.93	24.12	9.14	25.025
'Aga'	-1.05786	3.88635e-05	7.57	6.95	16.31	15.43	7.26	15.87
'Mtx2'	-1.05811	0.000267893	8.12	5.4	14.33	16.56	6.76	15.445
'Arrdc3'	-1.05881	4.06192e-06	8.03	4.67	14.08	14.88	6.35	14.48
'Crem'	-1.05971	0.00202445	2.58	1.72	5.1	5.38	2.15	5.24
'Socs5'	-1.06024	0.000211305	1.77	1.3	3.53	3.71	1.535	3.62
'Ago4'	-1.06091	1.37829e-07	6.77	4.15	12.5	12.18	5.46	12.34
'Cxxc5'	-1.06313	1.72988e-21	51.52	44.56	113.25	111.38	48.04	112.315
'Evi5'	-1.06402	1.05323e-11	8.18	5.99	16.23	17.15	7.085	16.69
'1190002N15Rik'	-1.06626	7.49769e-06	7.12	4.1	13.19	12.55	5.61	12.87
'Hacd1'	-1.06858	0.021005	2.2	2.14	4.52	4.54	2.17	4.53
'Pole4'	-1.07012	6.24779e-09	15.15	13.49	29.79	30.65	14.32	30.22
'Mitf'	-1.07473	0.00157309	1.13	0.92	2.42	2.34	1.025	2.38
'Glcci1'	-1.07634	0.00494145	26.07	15.86	46.83	51.27	20.965	49.05
'Golim4'	-1.07665	1.34274e-11	7.01	5.86	14.72	15.65	6.435	15.185
'Fndc3b'	-1.07704	8.09452e-06	4.99	2.66	8.78	8.92	3.825	8.85
'Ssx2ip'	-1.07813	0.00650684	2.01	1.02	3.54	3.44	1.515	3.49
'Ctbs'	-1.07841	0.000428268	2.73	1.91	5.45	5.14	2.32	5.295
'Edem3'	-1.08138	2.08048e-16	9.72	7.94	20.56	20.53	8.83	20.545
'Atp1a1'	-1.08405	2.96861e-23	108.13	90.23	240.21	222.09	99.18	231.15
'Tmem191c'	-1.08427	0.000603878	3.79	4.31	9.02	9.92	4.05	9.47
'Fosl2'	-1.08453	0.0131434	0.5	0.59	1.4	1.15	0.545	1.275
'Acsl1'	-1.08593	1.04761e-17	19.71	16.35	41.67	42.04	18.03	41.855
'Zfyve21'	-1.08622	0.00314046	3.85	2.84	7.78	7.83	3.345	7.805
'Khk'	-1.0892	1.55298e-18	47.24	42.84	100.8	110.61	45.04	105.705
'Creb3l2'	-1.09086	2.15977e-15	9.15	7.52	19.89	18.84	8.335	19.365
'Pde2a'	-1.09283	0.00168989	1.14	1.03	2.57	2.52	1.085	2.545
'Man2a1'	-1.09347	7.12531e-11	7.15	5.15	14.26	13.9	6.15	14.08
'Gas7'	-1.09393	1.33006e-16	24.22	18.18	49.62	50.57	21.2	50.095
'Rrm2b'	-1.09509	2.42474e-09	5.1	3.99	10.19	11.16	4.545	10.675
'Gapt'	-1.09676	2.93425e-17	60.25	46.17	126	124.1	53.21	125.05
'Cd72'	-1.09813	6.79744e-16	39.3	32.84	81.7	89.88	36.07	85.79
'Acyp1'	-1.10025	0.00418463	6.05	7.04	15.61	14.87	6.545	15.24
'Chdh'	-1.10104	1.4345e-28	46.15	41.08	102.67	104.26	43.615	103.465
'Cacna1d'	-1.10481	9.67361e-13	5.89	4.34	12.02	12.27	5.115	12.145
'Grn'	-1.10909	7.26443e-23	459.72	373.89	1036.81	939.27	416.805	988.04
'Hspa4l'	-1.10983	3.26741e-08	2.77	1.78	5.88	5.77	2.275	5.825
'Uqcc2'	-1.11193	3.00384e-05	18.31	17.95	38.74	47.9	18.13	43.32
'Fam241a'	-1.11225	5.14784e-05	9.54	5.5	18.39	17.24	7.52	17.815
'Dcun1d4'	-1.11238	7.30846e-06	2.37	1.92	5.03	5.27	2.145	5.15
'Klk1'	-1.11772	4.40394e-13	416.37	290.37	759.73	924.28	353.37	842.005
'Plk2'	-1.11843	0.00189565	1.63	1.69	4.53	3.41	1.66	3.97
'Rell2'	-1.11845	0.0302762	1.12	1.04	2.3	3.11	1.08	2.705
'Gbp8'	-1.12015	1.94501e-16	19.94	16.57	41.88	44.84	18.255	43.36
'Csprs'	-1.12044	0.0149829	1.68	0.96	3.65	2.64	1.32	3.145
'Cebpd'	-1.121	1.06535e-05	3.53	3.76	8.96	8.51	3.645	8.735
'Abcb4'	-1.12109	0.00084462	3.02	1.56	5.95	5.15	2.29	5.55
'Cpne2'	-1.12174	2.24999e-10	15.97	11.39	33.5	31.75	13.68	32.625
'Kctd6'	-1.12384	4.53564e-05	2.71	2.94	7.63	5.93	2.825	6.78
'Muc5ac'	-1.13093	3.69204e-06	0.84	0.76	1.97	1.9	0.8	1.935
'Frmd4a'	-1.13244	3.781e-14	18.46	13.05	38.59	37.19	15.755	37.89
'Kdm1b'	-1.13252	8.7038e-18	12.64	10.1	26.94	29.93	11.37	28.435
'Nme3'	-1.1329	7.07306e-06	12	12.92	28.03	32.26	12.46	30.145
'Slc27a1'	-1.13306	8.60548e-24	31.92	33.5	80.23	78.42	32.71	79.325
'Ugt1a7c'	-1.13593	0.000291514	1.74	1.53	3.72	4.18	1.635	3.95
'Ahi1'	-1.13736	0.000122283	2.06	1.34	4.43	4.26	1.7	4.345
'Spata13'	-1.1374	4.04056e-12	10.34	7.26	21.6	21.2	8.8	21.4
'Kdelc2'	-1.13772	0.00548769	1.14	0.78	2.29	2.38	0.96	2.335
'Adcy3'	-1.13955	2.70679e-05	1.57	1.37	3.57	3.61	1.47	3.59
'Rpf2'	-1.13958	1.49781e-07	10.53	8.78	22.81	24.46	9.655	23.635
'Abi2'	-1.14062	9.91704e-06	1.52	1.23	3.22	3.24	1.375	3.23
'Gm3636'	-1.14192	0.000135972	3.62	3.49	8.25	8.95	3.555	8.6
'Hdac3'	-1.1426	2.88472e-15	15.6	15.85	38.91	37.8	15.725	38.355
'Cd209d'	-1.14573	1.15132e-11	78.69	53.12	160.86	159.15	65.905	160.005
'Cpq'	-1.14649	0.000814946	2.47	2.17	5.59	5.72	2.32	5.655
'Zcchc24'	-1.14682	2.26576e-16	26.67	19.58	56.48	55.95	23.125	56.215
'Marcks'	-1.14739	8.60317e-13	7.37	6.09	17.17	15.63	6.73	16.4
'Phc1'	-1.14842	1.47537e-20	17.06	14.78	37.97	39.75	15.92	38.86
'Sytl1'	-1.15111	4.97124e-08	7.22	8.65	20.65	18.2	7.935	19.425
'Pkn3'	-1.15531	0.000698392	1.68	1.17	3.58	3.68	1.425	3.63
'Xaf1'	-1.15558	9.28421e-06	7	6.06	13.74	16.71	6.53	15.225
'Klra17'	-1.1566	1.41783e-17	61.24	48.94	128.59	141.41	55.09	135
'Etv1'	-1.15676	0.00744729	0.91	0.65	1.89	2.01	0.78	1.95
'Gng12'	-1.15759	3.91739e-16	16.53	12.5	35.17	35.87	14.515	35.52
'Dll1'	-1.1616	0.0204143	1.74	0.63	2.92	2.78	1.185	2.85
'Eml5'	-1.16352	3.4099e-06	0.85	0.86	1.86	2.22	0.855	2.04
'Sil1'	-1.16429	1.70363e-16	22.2	19.42	50.3	53.28	20.81	51.79
'Map7'	-1.16512	3.75065e-07	2.84	2.41	6.52	6.64	2.625	6.58
'Lipo3'	-1.16584	4.96128e-05	4.06	2.35	7.75	9.13	3.205	8.44
'Gale'	-1.16613	4.23071e-06	6.83	5.38	13.54	16.63	6.105	15.085
'Paqr5'	-1.16831	1.47478e-23	18	17.11	43.59	43.45	17.555	43.52
'Nav2'	-1.1706	1.3251e-11	3.08	2.3	6.45	6.49	2.69	6.47
'Bend4'	-1.17176	4.87212e-06	1.42	1.28	3.24	2.72	1.35	2.98
'Stk3'	-1.1741	8.31023e-08	4.58	4.23	10.06	10.58	4.405	10.32
'Ldlrad3'	-1.17555	6.12815e-11	8.9	6.21	18.77	18.79	7.555	18.78
'Uchl3'	-1.17573	6.28405e-10	17.35	15.16	39.35	41.5	16.255	40.425
'Trp53inp2'	-1.17586	1.54482e-09	4.28	3.22	9.85	9.63	3.75	9.74
'Usp46'	-1.17756	7.09352e-05	2.61	1.69	5.17	5.37	2.15	5.27
'Dynlt3'	-1.18069	3.14174e-07	10.43	6.53	19.35	22.83	8.48	21.09
'Phgdh'	-1.18245	2.07844e-20	26.44	24.7	65.86	61.92	25.57	63.89
'Galk1'	-1.18562	1.02651e-13	18.53	15.42	41.78	43.14	16.975	42.46
'Adcy9'	-1.18578	0.00763132	0.47	0.33	1.12	0.9	0.4	1.01
'Zhx3'	-1.18621	2.5304e-05	1.66	1.29	3.75	3.65	1.475	3.7
'Svbp'	-1.19244	2.79484e-06	14.11	10.4	29.83	31.35	12.255	30.59
'Trp53i11'	-1.19506	9.91741e-25	30.15	28.36	77.84	70.45	29.255	74.145
'Plcg1'	-1.19515	3.92983e-10	4.46	3.53	10.64	9.47	3.995	10.055
'Clcf1'	-1.1952	4.20645e-10	8.23	9.5	22.15	22.67	8.865	22.41
'Apod'	-1.19593	3.85306e-05	3.22	3.09	7.07	8.9	3.155	7.985
'Isg15'	-1.19614	5.7073e-06	12.06	9.42	25.39	28.51	10.74	26.95
'Nceh1'	-1.19634	1.84994e-15	18.63	13.27	39.84	40.27	15.95	40.055
'Tubb2a'	-1.19732	4.29869e-12	80.27	50.5	165.97	162.53	65.385	164.25
'Soga1'	-1.19987	4.60465e-14	8.59	5.99	19.73	17.25	7.29	18.49
'Ms4a4c'	-1.20005	0.000109898	5.59	3.27	10.63	11.73	4.43	11.18
'Jup'	-1.20186	0.00218183	1.11	1.63	4.13	2.9	1.37	3.515
'Trim36'	-1.20359	4.3665e-08	3.71	2.57	7.71	8.15	3.14	7.93
'Hsph1'	-1.20661	1.44723e-08	9.36	5.72	18.24	20.81	7.54	19.525
'Ly6c2'	-1.20828	8.45097e-40	539.53	490.39	1305.29	1312.87	514.96	1309.08
'Pvr'	-1.21103	9.75732e-10	4.59	4.44	11.19	11.83	4.515	11.51
'Cbr1'	-1.2133	1.31851e-05	5.95	6.01	15.48	14.95	5.98	15.215
'Naip5'	-1.21379	3.78745e-21	14.67	12.16	33.39	35.4	13.415	34.395
'Ak8'	-1.21412	7.98416e-11	10.22	10.89	29.17	25.34	10.555	27.255
'Mdfic'	-1.21455	0.000963974	1.84	1.09	3.4	3.96	1.465	3.68
'Traf3ip2'	-1.217	9.31246e-11	7.27	5.95	17.37	17.12	6.61	17.245
'Inppl1'	-1.21985	5.69995e-17	13.25	9.71	30.32	29.7	11.48	30.01
'Galnt7'	-1.22089	7.118e-11	4.63	3.56	10.46	10.52	4.095	10.49
'Tmem221'	-1.22308	2.73101e-20	35.83	30.12	86.87	81.98	32.975	84.425
'P3h3'	-1.22309	0.00349294	1.11	1.26	2.68	3.51	1.185	3.095
'Iigp1'	-1.22345	1.23156e-05	5.11	3.16	8.94	12.36	4.135	10.65
'Tbc1d12'	-1.2264	0.0139923	0.64	0.54	1.65	1.74	0.59	1.695
'Arl11'	-1.2276	1.02406e-06	5.64	4.93	13.44	13.88	5.285	13.66
'Slco3a1'	-1.22813	3.61745e-14	6.46	5.63	15.75	15.32	6.045	15.535
'Ell2'	-1.23329	2.47883e-07	5.99	3.53	11.6	12.86	4.76	12.23
'Zdhhc14'	-1.2373	7.61977e-20	23.74	19.17	56.36	58.76	21.455	57.56
'Stambpl1'	-1.23965	7.63608e-23	24.35	21.8	60.39	60.12	23.075	60.255
'Abhd17b'	-1.24054	2.59901e-17	37.61	27	81.11	86.72	32.305	83.915
'Tent5c'	-1.2407	2.69045e-12	6.02	5.99	14.81	14.68	6.005	14.745
'Hs3st1'	-1.24448	4.27621e-26	48.02	42.88	122.16	113.95	45.45	118.055
'2310022B05Rik'	-1.2452	5.66768e-15	10.49	8.05	24.47	23.81	9.27	24.14
'Rell1'	-1.24664	1.03491e-18	72.44	51.18	159.53	161.93	61.81	160.73
'Gm10406'	-1.24719	0.000580635	2.08	2.19	4.9	6.29	2.135	5.595
'Bglap3'	-1.24797	0.0101781	2.69	2.57	6.34	6.6	2.63	6.47
'Gadd45a'	-1.24914	9.38006e-05	4.51	3.63	11.04	10.23	4.07	10.635
'Pxylp1'	-1.25027	3.90087e-12	5.96	5.52	15.79	14.26	5.74	15.025
'Pgam2'	-1.25259	9.39873e-10	16.46	17.01	39.1	48.83	16.735	43.965
'Il27ra'	-1.25319	1.02535e-06	3.63	2.81	7.54	8.64	3.22	8.09
'Pdzd4'	-1.25394	3.98957e-23	42.22	33.05	99.98	97.84	37.635	98.91
'Arhgap6'	-1.25622	4.09672e-09	3.49	2.64	7.68	8.6	3.065	8.14
'Blcap'	-1.2579	1.36001e-15	13.09	10.93	31.16	31.95	12.01	31.555
'Rora'	-1.25834	0.0148891	0.22	0.16	0.48	0.55	0.19	0.515
'Phpt1'	-1.26152	0.000282007	7.45	11.97	25.57	26	9.71	25.785
'2610002M06Rik'	-1.26419	0.000131561	1.3	0.81	2.4	3.16	1.055	2.78
'Cd163'	-1.26444	2.95549e-07	1.96	1.76	5.01	4.91	1.86	4.96
'Ebpl'	-1.26635	3.52882e-06	3.47	2.84	8.32	8.37	3.155	8.345
'Fggy'	-1.26712	8.22502e-07	4.28	4.73	11.32	13.52	4.505	12.42
'Sorcs2'	-1.26737	1.60161e-05	0.94	0.95	2.53	2.49	0.945	2.51
'Clcn5'	-1.26859	1.52474e-15	7.72	5.31	16.55	17.41	6.515	16.98
'Pnck'	-1.27027	1.40358e-13	19.56	14.58	46.95	43.41	17.07	45.18
'Angpt1'	-1.27081	0.00794713	0.81	0.44	1.78	1.72	0.625	1.75
'Ets1'	-1.27131	3.63605e-20	17.66	13.26	40.15	42.16	15.46	41.155
'Fam222a'	-1.2716	0.0377445	0.65	0.5	1.69	1.32	0.575	1.505
'As3mt'	-1.27177	6.18548e-11	7.58	7.29	19.96	19.87	7.435	19.915
'Sccpdh'	-1.27858	0.0143117	1.02	0.99	2.56	2.82	1.005	2.69
'Usp18'	-1.27966	8.25196e-12	17.55	12.21	36.97	42.33	14.88	39.65
'C8a'	-1.28099	1.89704e-06	3.03	1.92	6.19	6.69	2.475	6.44
'Gpr85'	-1.28117	0.0139905	0.87	0.57	1.89	1.91	0.72	1.9
'Gm2666'	-1.28715	0.00290074	1.87	1.07	3.73	4.12	1.47	3.925
'Egln3'	-1.28987	0.0001827	1.46	1.55	4.2	3.92	1.505	4.06
'Oas1a'	-1.29198	3.37935e-06	4.63	3.8	11.56	10.85	4.215	11.205
'Comtd1'	-1.29348	0.00645839	1.17	0.89	2.62	2.93	1.03	2.775
'Tulp4'	-1.29774	6.71616e-12	2.11	1.5	5.42	5.03	1.805	5.225
'2410004P03Rik'	-1.29927	7.0034e-05	2.77	2.46	6.51	7.51	2.615	7.01
'Prkag2'	-1.30197	1.83512e-25	18.04	14.96	52.96	51.55	16.5	52.255
'Itgad'	-1.30269	4.20921e-09	2.82	2.59	7.91	6.72	2.705	7.315
'Ypel2'	-1.30485	5.14784e-12	4.35	3.19	10.4	10.04	3.77	10.22
'Cpped1'	-1.31241	9.18031e-10	5.49	4.04	12.94	12.8	4.765	12.87
'Rnf187'	-1.32078	2.0063e-45	123.18	115.58	328.71	328.02	119.38	328.365
'Rps6ka2'	-1.33021	5.20747e-07	1.3	1.16	3.54	3.28	1.23	3.41
'Trio'	-1.33176	6.69246e-14	2.2	1.66	5.57	5.12	1.93	5.345
'Usp20'	-1.33362	1.27701e-17	7.49	5.96	18.99	18.25	6.725	18.62
'Tmem65'	-1.33387	9.19979e-07	1.88	1.54	4.61	5.12	1.71	4.865
'Id3'	-1.33474	0.00260712	3.22	2.32	7.95	7.4	2.77	7.675
'Mansc1'	-1.33825	0.00556576	1.26	0.75	2.93	2.64	1.005	2.785
'Fam20b'	-1.3392	2.29904e-14	8.79	5.97	20.15	20.85	7.38	20.5
'Sema7a'	-1.34002	1.694e-13	13.36	8.97	32.91	28.83	11.165	30.87
'Spns3'	-1.34041	2.34951e-32	43.1	38.78	113.99	112.74	40.94	113.365
'Zdhhc23'	-1.3409	4.65039e-09	1.72	1.5	4.73	4.25	1.61	4.49
'Mras'	-1.34144	3.47214e-08	3.53	2.28	7.82	8.23	2.905	8.025
'Src'	-1.34301	5.44356e-05	1.55	0.99	3.45	3.59	1.27	3.52
'Them6'	-1.34783	1.77577e-19	22.67	18.4	57.76	57.16	20.535	57.46
'Srl'	-1.35029	3.56576e-12	4.02	3.24	10	10.78	3.63	10.39
'Ispd'	-1.35073	0.00962848	0.83	0.51	1.79	1.97	0.67	1.88
'Slc25a15'	-1.35161	5.3465e-05	1.81	1.08	4.14	4	1.445	4.07
'Fstl3'	-1.35219	3.75669e-10	5.56	4.82	14.4	14.68	5.19	14.54
'Btg3'	-1.35792	1.21833e-18	19.82	17.42	52.11	52.64	18.62	52.375
'Mxd4'	-1.35806	1.09247e-16	18.34	16.02	49.15	47.75	17.18	48.45
'Nqo2'	-1.36242	6.20329e-05	1.28	1.02	3.22	3.16	1.15	3.19
'Slc35d3'	-1.3646	0.000252139	1.47	1.26	4.37	3.44	1.365	3.905
'Bfsp2'	-1.36621	0.0149829	1.05	1.01	2.76	3.08	1.03	2.92
'Ranbp17'	-1.37103	0.0256599	0.46	0.33	1.18	1.13	0.395	1.155
'Cdc42bpa'	-1.37773	0.0131692	0.37	0.15	0.64	0.85	0.26	0.745
'Gm38690'	-1.37908	0.0467501	0.86	0.52	1.17	1.61	0.69	1.39
'Hs3st3b1'	-1.38104	3.39894e-08	1.74	1.22	4.44	3.98	1.48	4.21
'Lxn'	-1.38464	4.63477e-06	4.77	4.23	12.88	13	4.5	12.94
'Tspyl4'	-1.38647	6.7047e-09	3.91	2.42	8.98	9.18	3.165	9.08
'Epsti1'	-1.38789	4.78732e-28	36.5	30.9	93.93	96.19	33.7	95.06
'Stau2'	-1.39126	0.00800693	0.97	0.46	1.75	2.4	0.715	2.075
'Arl5c'	-1.39721	8.87001e-31	34.06	32.08	92.83	99.36	33.07	96.095
'Thsd1'	-1.3992	0.0247627	0.34	0.31	1.07	0.93	0.325	1
'Synpo2'	-1.39951	0.0313808	0.31	0.23	0.77	0.69	0.27	0.73
'Oasl2'	-1.40103	1.30052e-16	13.68	10.3	33.09	35.95	11.99	34.52
'Btbd3'	-1.404	1.01328e-12	5.3	3.57	12.85	12.9	4.435	12.875
'Apba1'	-1.40565	9.86885e-32	8.89	8.16	25.75	24	8.525	24.875
'Notch3'	-1.40581	5.25152e-11	4.19	2.47	10.11	9.22	3.33	9.665
'Ceacam1'	-1.41207	8.38276e-33	19.87	17.14	55.06	54.37	18.505	54.715
'Zfp521'	-1.41441	3.28049e-07	1.54	0.95	3.75	3.58	1.245	3.665
'Map2k6'	-1.41506	4.0984e-07	3.36	2.17	8.38	9.16	2.765	8.77
'Casc4'	-1.41644	1.74546e-07	1.46	1.54	4.21	4.7	1.5	4.455
'Cd1d1'	-1.42172	4.68398e-09	4.43	4.01	13.27	11.66	4.22	12.465
'2610042L04Rik'	-1.42223	0.005803	1.36	1.24	3.23	3.64	1.3	3.435
'Rassf8'	-1.42483	1.84342e-08	1.26	1.54	4.23	3.78	1.4	4.005
'Rundc3b'	-1.42609	0.0098931	0.68	0.34	1.46	1.58	0.51	1.52
'Cd209a'	-1.42973	0.00316547	35.36	18.63	80.25	78.78	26.995	79.515
'Cd276'	-1.4323	2.24819e-06	1.78	1.35	4.79	4.48	1.565	4.635
'Afap1'	-1.43262	0.0138374	0.25	0.21	0.72	0.6	0.23	0.66
'Laptm4b'	-1.43507	4.03713e-09	3.89	4.12	11.31	12.56	4.005	11.935
'Prg2'	-1.44725	0.00180818	2.87	3.05	7.08	10.76	2.96	8.92
'Gdpd1'	-1.44969	0.000588619	1.09	0.93	2.87	3.23	1.01	3.05
'Rgs10'	-1.45167	2.81471e-23	45.87	37.81	118.06	134.38	41.84	126.22
'Angptl7'	-1.45563	1.11134e-09	8.65	5.2	19.14	22.5	6.925	20.82
'Ddx60'	-1.46237	0.0381923	0.25	0.18	0.55	0.63	0.215	0.59
'Bag2'	-1.46414	0.00403705	1.42	0.81	3.55	3.17	1.115	3.36
'Havcr1'	-1.46633	1.92506e-22	46.01	32.95	116.73	125.33	39.48	121.03
'Dbndd1'	-1.46777	0.0321646	1.27	0.47	2.55	2.5	0.87	2.525
'P2ry6'	-1.4722	7.95532e-10	6.04	4.07	15.68	15.14	5.055	15.41
'Il1rl2'	-1.47589	6.2578e-08	1.46	1.23	4.48	4.67	1.345	4.575
'Dab2ip'	-1.47684	0.000815405	0.4	0.35	1.12	1.17	0.375	1.145
'Tulp3'	-1.47907	0.00194269	0.68	0.55	2.07	1.67	0.615	1.87
'Fam174b'	-1.48092	9.34852e-05	1.1	1.29	3.28	4.06	1.195	3.67
'Gm3383'	-1.48195	5.16306e-05	1.81	1.94	5.39	6.21	1.875	5.8
'Wdsub1'	-1.48762	2.59264e-06	2.63	1.95	6.89	7.01	2.29	6.95
'App'	-1.48959	9.1223e-12	2.78	1.93	9.96	8.34	2.355	9.15
'Gbp5'	-1.49159	0.000635622	1.38	0.66	3.24	3.01	1.02	3.125
'Pam'	-1.49172	0.00117065	0.64	0.58	2.2	1.51	0.61	1.855
'Psd3'	-1.49476	1.72271e-07	0.71	0.52	2	1.92	0.615	1.96
'Rai2'	-1.49689	2.52046e-07	3.75	2.28	9.66	9.04	3.015	9.35
'Eya1'	-1.50211	2.68493e-13	2.36	2.51	7.62	7.53	2.435	7.575
'Dip2c'	-1.50667	1.676e-11	1.36	1.02	3.76	3.64	1.19	3.7
'Adk'	-1.50687	4.55185e-10	13.61	7.23	32.61	32.73	10.42	32.67
'Ifih1'	-1.50809	3.47975e-08	2.47	1.41	5.18	5.73	1.94	5.455
'Prss34'	-1.5092	4.29885e-05	2.89	3.05	8.61	10.04	2.97	9.325
'Mfsd7a'	-1.50989	0.00235815	0.95	0.6	2.44	2.5	0.775	2.47
'Nat8l'	-1.50999	1.38077e-06	0.67	0.67	2.28	1.92	0.67	2.1
'Prmt2'	-1.51266	0.000160773	1.46	1.17	4.35	3.97	1.315	4.16
'Ephb2'	-1.51747	1.76954e-20	1.87	2.14	6.5	6.14	2.005	6.32
'Pqlc3'	-1.52164	1.74995e-47	45.73	44.33	142.18	144.6	45.03	143.39
'Mapre3'	-1.52728	0.000509448	1.05	1.38	3.73	3.96	1.215	3.845
'Kdr'	-1.53126	0.0181728	3.18	1.39	6.95	7.11	2.285	7.03
'March9'	-1.53802	0.000628791	1.09	1	3.41	3.29	1.045	3.35
'Man1c1'	-1.53947	1.36196e-27	28.48	22.75	84.82	73.8	25.615	79.31
'Taf9b'	-1.54952	1.14791e-07	2.67	1.82	6.72	7.77	2.245	7.245
'Adam19'	-1.55289	2.91712e-34	26.38	20.32	74	77.05	23.35	75.525
'Scamp1'	-1.55652	3.03124e-06	1.21	0.9	3.27	3.63	1.055	3.45
'Pon3'	-1.55786	9.34017e-06	3.95	2.24	9.22	9.59	3.095	9.405
'Erbb3'	-1.55983	1.64189e-09	4	2.22	10.84	9.2	3.11	10.02
'Cobll1'	-1.56051	2.7704e-18	5.89	4.08	16.24	16.02	4.985	16.13
'Duxbl1'	-1.56212	0.00500828	17.57	8.69	40.61	38.78	13.13	39.695
'Rgs18'	-1.56501	4.45074e-29	16.91	14.97	49.81	54.3	15.94	52.055
'Gem'	-1.56678	6.788e-11	6.81	4.02	17.5	17.66	5.415	17.58
'Abcg3'	-1.56757	1.35602e-09	3.12	2.19	7.92	9.38	2.655	8.65
'Gpc1'	-1.57395	3.48753e-08	1.54	1.25	4.38	4.67	1.395	4.525
'Grin3b'	-1.57431	0.0300326	0.55	0.3	1.44	0.99	0.425	1.215
'Sdc3'	-1.57913	1.08173e-19	6.44	4.77	19.89	17.08	5.605	18.485
'Fah'	-1.58362	0.0434724	0.69	0.38	1.69	1.82	0.535	1.755
'Lat'	-1.58471	0.000185224	1.7	2.03	5.91	6.42	1.865	6.165
'Tmem254a'	-1.58888	0.00463998	0.77	0.68	1.91	2.63	0.725	2.27
'Timp2'	-1.59164	0.000365777	20.55	11.2	53.32	51.36	15.875	52.34
'2700081O15Rik'	-1.59457	2.75745e-08	1.05	1.07	3.7	3.37	1.06	3.535
'P2ry13'	-1.60188	4.58135e-18	13.21	8.77	34.03	39.17	10.99	36.6
'Thnsl2'	-1.60666	0.00127538	1.24	0.65	3.11	3.23	0.945	3.17
'Nfe2l3'	-1.61267	1.55265e-06	2.05	1.34	5	6.38	1.695	5.69
'Macrod2'	-1.61426	0.0385224	0.21	0.27	0.8	0.68	0.24	0.74
'Lynx1'	-1.61435	1.09378e-20	8.47	5.83	24.71	23.33	7.15	24.02
'Rasal2'	-1.61858	0.000160773	0.24	0.22	0.75	0.8	0.23	0.775
'Rpl3l'	-1.6217	0.000505394	1.38	0.75	4.01	4.29	1.065	4.15
'Bdh1'	-1.62312	4.72656e-06	1.13	0.98	3.98	3.19	1.055	3.585
'Tnfsf10'	-1.62453	3.072e-05	1.2	0.53	2.76	3.01	0.865	2.885
'Tmem254b'	-1.62585	2.20104e-45	38.35	36.95	130.12	126.34	37.65	128.23
'A530032D15Rik'	-1.62622	7.29497e-12	11.41	7.02	31.89	30.02	9.215	30.955
'Inka1'	-1.62672	3.21855e-05	3.97	2.18	9.92	10.89	3.075	10.405
'B3gnt9'	-1.63149	2.09752e-08	2.12	1.8	6.51	6.84	1.96	6.675
'Col17a1'	-1.63463	3.21499e-07	1.11	0.65	2.9	3.14	0.88	3.02
'Dennd5b'	-1.6385	1.01007e-07	0.53	0.37	1.57	1.64	0.45	1.605
'Prkcg'	-1.64008	7.08819e-38	12.69	13.39	44.87	44.71	13.04	44.79
'Gnb4'	-1.64153	2.32803e-12	5.74	3.04	15.78	14.76	4.39	15.27
'Epha2'	-1.64314	2.98249e-45	52.83	41.65	162.71	164.3	47.24	163.505
'Meis3'	-1.64529	8.59806e-05	1.72	1.1	4.56	4.85	1.41	4.705
'Ifi44'	-1.64793	9.15465e-20	9.47	6.69	25.73	29.56	8.08	27.645
'Abca5'	-1.65846	1.66352e-07	1.34	0.61	3.28	3.46	0.975	3.37
'Tmigd3'	-1.65931	0.000598077	2.75	1.38	6.92	7.65	2.065	7.285
'Cacna1e'	-1.66164	0.0456684	15.21	5.43	36.37	34.07	10.32	35.22
'Gbp2'	-1.66245	0.0179028	0.38	0.35	1.26	1.28	0.365	1.27
'Ppp1r14b'	-1.6789	9.34833e-33	32.85	28.51	110.71	105.44	30.68	108.075
'Kif5c'	-1.68104	0.0492522	0.09	0.09	0.29	0.37	0.09	0.33
'Srpk3'	-1.68988	2.34367e-08	2.76	1.91	7.99	8.65	2.335	8.32
'Fcgr2b'	-1.6928	1.06659e-21	9.46	9.54	34.05	32.22	9.5	33.135
'Tubb3'	-1.69382	0.00450268	0.83	0.57	2.44	2.54	0.7	2.49
'Kif7'	-1.69889	0.00452359	0.35	0.23	0.86	1.24	0.29	1.05
'Serinc5'	-1.70031	1.04187e-07	29.56	18.81	81.53	90.77	24.185	86.15
'Rbpms'	-1.70585	1.66995e-08	2.01	2.01	5.88	6.22	2.01	6.05
'Inafm2'	-1.70856	8.2738e-20	15.63	9.47	45.11	44.78	12.55	44.945
'Gpr20'	-1.70952	0.0467501	0.06	0.11	0.67	0.9	0.085	0.785
'Anks6'	-1.71296	5.18004e-08	1.31	0.85	3.58	3.66	1.08	3.62
'Fgd6'	-1.72228	0.00261949	0.25	0.13	0.7	0.63	0.19	0.665
'Fcrla'	-1.72969	2.62273e-64	65.85	62.71	226.89	242.83	64.28	234.86
'Gm15433'	-1.73689	0.00173756	1.28	0.36	2.6	3.29	0.82	2.945
'Tmem38b'	-1.73775	2.28188e-06	1.42	0.83	4.07	4.12	1.125	4.095
'Gbp10'	-1.74396	8.81686e-06	0.9	0.59	2.76	2.66	0.745	2.71
'Irak1bp1'	-1.74935	0.0341612	0.4	0.32	1.35	1.23	0.36	1.29
'Rcn1'	-1.75354	1.91099e-12	1.99	1.82	7.02	7.08	1.905	7.05
'Cdk5r1'	-1.75456	0.00294715	0.44	0.22	1.44	1.02	0.33	1.23
'Chst10'	-1.75665	0.00343942	0.4	0.33	1.32	1.32	0.365	1.32
'Myh14'	-1.75749	5.38638e-10	0.98	0.65	3.06	2.99	0.815	3.025
'Slc16a7'	-1.77369	2.09251e-10	1.33	0.69	4.17	3.98	1.01	4.075
'Vangl1'	-1.77423	0.0307384	0.13	0.09	0.55	0.4	0.11	0.475
'Cacnb2'	-1.78036	1.73424e-06	0.63	0.6	2.05	2.19	0.615	2.12
'Lgalsl'	-1.78216	0.00259704	0.3	0.32	1.12	1.2	0.31	1.16
'Thbs1'	-1.78305	0.000314555	0.38	0.24	1.38	0.94	0.31	1.16
'Prrg4'	-1.78656	1.61965e-07	1.65	0.97	4.95	4.9	1.31	4.925
'Syde2'	-1.79528	0.0148985	0.17	0.13	0.61	0.55	0.15	0.58
'Csf1'	-1.80127	0.0017136	0.36	0.23	1.14	1.07	0.295	1.105
'Ptprf'	-1.80137	5.93535e-49	12.89	10.22	45.79	43.07	11.555	44.43
'Lrp8'	-1.80445	1.01724e-30	29.72	19.16	95.25	92.84	24.44	94.045
'Hrh1'	-1.80482	1.37856e-05	0.51	0.6	2.16	2.13	0.555	2.145
'Camsap3'	-1.80555	1.30082e-07	0.78	0.64	3.05	2.64	0.71	2.845
'Acvr2a'	-1.81816	2.10834e-13	1.72	1.12	5.11	5.73	1.42	5.42
'Arhgef10l'	-1.81919	4.98592e-16	5.15	2.81	16.52	15.21	3.98	15.865
'Cpa3'	-1.81982	0.036342	0.38	0.44	1.59	1.58	0.41	1.585
'Pla2g4f'	-1.82633	0.00278829	0.42	0.38	1.42	1.74	0.4	1.58
'Tubb2b'	-1.83287	3.57524e-22	18.45	11.32	58.11	58.09	14.885	58.1
'Sntg2'	-1.83803	0.000480562	0.63	0.7	2.51	2.45	0.665	2.48
'Duxbl3'	-1.84137	0.0231116	11.59	4.6	32.21	31.16	8.095	31.685
'Hid1'	-1.8417	2.63587e-11	2.33	1.4	7.09	7.59	1.865	7.34
'Tmem163'	-1.84295	4.69643e-30	12.28	9.31	42.13	41.18	10.795	41.655
'Fabp5'	-1.8471	3.59584e-08	3.77	2.96	13.43	13.08	3.365	13.255
'Chrnb1'	-1.8549	1.74228e-14	3.33	2.6	11.1	11.87	2.965	11.485
'Bmp6'	-1.86465	1.42341e-06	1.14	0.67	3.36	3.85	0.905	3.605
'Fbxl13'	-1.86941	1.67182e-06	1.72	0.8	4.71	5.28	1.26	4.995
'Nnt'	-1.872	1.30609e-49	9.68	8.76	37.73	36.56	9.22	37.145
'Sbspon'	-1.87323	0.0122947	0.26	0.26	1.07	1	0.26	1.035
'A830010M20Rik'	-1.87915	1.84119e-19	1.47	1.16	5.13	5.54	1.315	5.335
'Fgd1'	-1.87923	0.0453623	0.16	0.11	0.44	0.67	0.135	0.555
'Adamtsl2'	-1.88097	4.10182e-10	1.35	1.68	5.13	7.12	1.515	6.125
'Arhgap24'	-1.89494	3.37726e-14	2.08	1.52	6.98	8.25	1.8	7.615
'Rras2'	-1.89961	7.08862e-16	4.72	2.98	15.35	16.23	3.85	15.79
'Slc22a17'	-1.90567	5.49507e-07	0.97	1.01	3.91	4.28	0.99	4.095
'Itgb4'	-1.9112	0.00450142	0.16	0.12	0.53	0.61	0.14	0.57
'Slamf6'	-1.91541	2.06177e-43	10.5	9.09	42.69	45.6	9.795	44.145
'Magee2'	-1.92316	0.00468264	0.59	0.24	1.62	1.8	0.415	1.71
'Ldhb'	-1.9252	5.0612e-29	27.4	17.96	91	98.27	22.68	94.635
'Farp1'	-1.93293	9.74607e-05	0.48	0.22	1.43	1.48	0.35	1.455
'Dnaja4'	-1.94114	1.00629e-05	0.67	0.5	2.51	2.43	0.585	2.47
'Xkrx'	-1.94228	1.03632e-60	16.13	14.51	68.26	64.63	15.32	66.445
'Gm3488'	-1.94406	8.20863e-06	1.21	0.78	3.91	5.09	0.995	4.5
'Mtus2'	-1.94607	0.00417031	0.3	0.15	0.83	1.04	0.225	0.935
'Rnase4'	-1.94766	0.000256723	2.01	0.64	6.1	4.73	1.325	5.415
'Tmtc2'	-1.95922	0.000924644	0.18	0.26	0.7	0.8	0.22	0.75
'Ccr3'	-1.96422	0.0243669	0.19	0.24	0.83	0.83	0.215	0.83
'Ddn'	-1.96798	1.07464e-20	2.17	2.38	10.49	9.15	2.275	9.82
'Elovl6'	-1.97668	8.36389e-31	3.34	2.44	12.45	12.51	2.89	12.48
'Ralgps2'	-1.98055	0.00243191	2.61	0.9	6.95	6.59	1.755	6.77
'Ttc39a'	-1.98598	0.000149096	1.05	0.41	3.01	3.37	0.73	3.19
'Plekha6'	-2.00383	1.16247e-10	0.44	0.4	2.04	1.79	0.42	1.915
'Tppp'	-2.00414	0.00552933	0.2	0.1	0.61	0.7	0.15	0.655
'Clstn1'	-2.01374	8.49674e-26	2.61	2.11	10.94	9.97	2.36	10.455
'Clec10a'	-2.01445	7.91419e-83	52.22	47.67	217.81	226.47	49.945	222.14
'Lca5l'	-2.01941	0.0227829	0.26	0.11	0.69	0.97	0.185	0.83
'Ppm1e'	-2.02001	4.06517e-20	2.93	1.69	9.73	10.81	2.31	10.27
'Slc6a9'	-2.02075	0.000423639	0.43	0.26	1.64	1.39	0.345	1.515
'Lamc1'	-2.02655	3.20222e-16	0.86	0.63	3.44	3.24	0.745	3.34
'Pard3'	-2.03543	0.0271612	0.09	0.08	0.3	0.42	0.085	0.36
'Gpr162'	-2.04087	2.64957e-28	7.42	5.04	29.29	27.76	6.23	28.525
'Rnd3'	-2.04278	3.96926e-52	35.74	25.96	139.43	139.67	30.85	139.55
'Galc'	-2.04631	9.10634e-13	1	1.13	4.55	4.9	1.065	4.725
'Pls1'	-2.06704	0.00901816	0.17	0.15	0.69	0.76	0.16	0.725
'Tlr5'	-2.06845	6.03936e-06	0.69	0.35	2.82	2.34	0.52	2.58
'Aoah'	-2.07261	0.00780268	0.39	0.13	1.43	1.32	0.26	1.375
'Dll4'	-2.07974	1.61647e-17	4.54	2.38	16.49	15.52	3.46	16.005
'Il17rb'	-2.08278	4.26867e-54	11.62	11.35	53.23	53.97	11.485	53.6
'Obscn'	-2.08494	0.00113788	2.73	1.16	8.74	9.24	1.945	8.99
'Diras2'	-2.08619	0.000320616	0.33	0.23	1.67	0.94	0.28	1.305
'Arpp21'	-2.08885	1.82125e-11	0.88	1.16	4.72	4.63	1.02	4.675
'Ifit3'	-2.09583	2.03308e-06	0.9	0.74	3.58	4.16	0.82	3.87
'Il18'	-2.10254	0.0013394	0.72	0.9	3.46	4.35	0.81	3.905
'Cnn3'	-2.12974	2.28131e-24	4.11	3.38	18.32	17.76	3.745	18.04
'LOC100861615'	-2.13891	0.0183077	0.38	0.15	1.02	1.37	0.265	1.195
'Pld1'	-2.13946	0.000216757	0.27	0.14	0.98	0.99	0.205	0.985
'Cib2'	-2.15059	9.80982e-09	3.91	2.51	15.84	15.43	3.21	15.635
'Slc22a12'	-2.15242	3.9283e-12	1.81	1.2	7.34	7.36	1.505	7.35
'Auts2'	-2.15521	3.53443e-07	0.32	0.25	1.37	1.34	0.285	1.355
'Vcan'	-2.15767	0.0414138	0.05	0.03	0.17	0.26	0.04	0.215
'Tgfbr3'	-2.16912	1.06361e-05	0.26	0.17	0.99	1.12	0.215	1.055
'Inpp4b'	-2.16994	3.85729e-16	1.1	0.66	4.16	4.08	0.88	4.12
'Klhl41'	-2.17413	0.00175484	0.45	0.25	1.11	2.2	0.35	1.655
'Pde5a'	-2.17697	1.04269e-07	0.43	0.23	1.47	1.83	0.33	1.65
'Spry1'	-2.19299	3.14353e-09	0.96	1.47	6.7	5.18	1.215	5.94
'Bcar3'	-2.20431	0.000573865	0.24	0.24	1.13	1.2	0.24	1.165
'Mzb1'	-2.20938	4.47903e-30	15.92	11.01	64.96	71.73	13.465	68.345
'Maged2'	-2.20987	0.00441047	0.26	0.26	1.19	1.38	0.26	1.285
'Vegfd'	-2.21419	1.7444e-05	0.97	0.49	3.15	3.99	0.73	3.57
'Usp2'	-2.21463	8.55784e-07	0.59	0.35	2.67	2.22	0.47	2.445
'Ephx2'	-2.22235	0.0350812	0.19	0.13	0.78	0.86	0.16	0.82
'Aldh1l1'	-2.23654	0.0108822	0.28	0.07	0.78	1.04	0.175	0.91
'Gprc5c'	-2.24615	0.00604422	0.23	0.08	0.93	0.73	0.155	0.83
'Rhbdf1'	-2.24675	0.00685974	0.27	0.14	1.07	0.79	0.205	0.93
'Ccdc9b'	-2.25582	0.0131044	0.13	0.06	0.42	0.52	0.095	0.47
'Wnt10b'	-2.26298	1.46661e-09	0.7	0.87	4.55	3.62	0.785	4.085
'Snph'	-2.26921	0.000589014	0.14	0.17	0.85	0.73	0.155	0.79
'Atp1b1'	-2.27255	2.27678e-07	76.16	40.96	318.5	300.22	58.56	309.36
'Sh3pxd2b'	-2.27294	0.0327519	0.03	0.06	0.33	0.17	0.045	0.25
'Ncs1'	-2.27546	0.0499563	0.05	0.08	0.39	0.31	0.065	0.35
'LOC102632102'	-2.2757	0.0492107	0.13	0.2	0.87	0.85	0.165	0.86
'Adgrl2'	-2.2763	3.89793e-09	0.74	0.3	2.64	2.73	0.52	2.685
'Cav2'	-2.28734	7.44271e-06	0.61	0.34	2.6	2.4	0.475	2.5
'Gprasp2'	-2.29213	0.00648187	0.12	0.13	0.76	0.56	0.125	0.66
'Atp2a1'	-2.30348	6.18732e-46	8.36	5.82	39.6	37.13	7.09	38.365
'Akap12'	-2.30404	2.35432e-10	0.4	0.28	1.83	1.86	0.34	1.845
'Slc9a2'	-2.31912	0.0300048	0.08	0.09	0.48	0.45	0.085	0.465
'Cd200'	-2.32373	9.72275e-36	7.48	5.03	33.28	35.46	6.255	34.37
'Il7r'	-2.32584	2.89017e-10	19.15	11.17	82.27	84.1	15.16	83.185
'Emid1'	-2.32661	1.18951e-28	3.3	3.21	18.2	18.01	3.255	18.105
'Ly6d'	-2.32846	1.20762e-112	307.69	277.06	1512.66	1720.58	292.375	1616.62
'Rgs7bp'	-2.33565	1.86934e-13	0.48	0.41	2.28	2.75	0.445	2.515
'Fyb2'	-2.34006	4.17839e-45	6.27	4.93	28.4	34.99	5.6	31.695
'Ctif'	-2.34195	5.93006e-17	0.87	0.53	3.95	3.79	0.7	3.87
'Sort1'	-2.35254	3.36913e-06	9.24	4.52	38.29	38.33	6.88	38.31
'Gpr174'	-2.37852	7.98878e-21	1.56	0.89	6.66	7.38	1.225	7.02
'Upk1b'	-2.3919	0.00209459	0.53	0.18	2.63	1.42	0.355	2.025
'Itm2a'	-2.39294	1.20203e-07	1.01	0.67	5.03	4.62	0.84	4.825
'Adgra3'	-2.40607	6.39554e-05	0.17	0.17	0.92	1.05	0.17	0.985
'Nrp1'	-2.40675	7.2811e-06	5.77	2.71	23.37	24.54	4.24	23.955
'Actrt3'	-2.40904	0.0214805	0.12	0.2	0.95	0.91	0.16	0.93
'Myo5b'	-2.41489	0.0074014	0.08	0.04	0.42	0.28	0.06	0.35
'Gnb5'	-2.42148	0.000431867	0.37	0.19	1.61	1.68	0.28	1.645
'Plod2'	-2.43447	6.52025e-24	1.47	1.23	8.66	7.28	1.35	7.97
'Pir'	-2.44142	0.0136075	8.65	2.34	30.54	34.75	5.495	32.645
'Gbp6'	-2.45036	1.48232e-31	4.24	2.59	18.39	23.21	3.415	20.8
'Epcam'	-2.45089	4.61489e-12	1.32	0.87	5.98	7.18	1.095	6.58
'Apcdd1'	-2.45219	9.40013e-08	0.72	0.33	3.08	3.18	0.525	3.13
'Dst'	-2.45976	1.37931e-06	1.05	0.51	4.61	4.6	0.78	4.605
'Calhm6'	-2.47177	4.11825e-06	1.33	0.61	5.58	6.22	0.97	5.9
'Ear2'	-2.47814	0.00964604	0.47	0.47	3.05	2.81	0.47	2.93
'Fam171a1'	-2.48671	0.00018943	0.15	0.18	1.22	0.88	0.165	1.05
'Pfn2'	-2.49067	0.0310323	0.16	0.08	0.73	0.77	0.12	0.75
'Clec4a3'	-2.49074	0.0148098	0.17	0.38	2.07	1.07	0.275	1.57
'Basp1'	-2.50815	1.25153e-23	3.12	2.05	16.04	16.25	2.585	16.145
'Il17d'	-2.51241	4.87506e-05	0.86	0.45	4.92	3.25	0.655	4.085
'Fzd9'	-2.5223	0.0115704	0.31	0.05	1.34	0.92	0.18	1.13
'Adgre4'	-2.53414	0.00321379	0.19	0.08	1.12	0.55	0.135	0.835
'Zbtb10'	-2.54129	9.68458e-37	3.46	1.95	16.78	17.66	2.705	17.22
'Akap2'	-2.57042	6.49222e-10	0.62	0.2	2.41	2.78	0.41	2.595
'Alkal1'	-2.57414	0.00108489	0.52	0.52	3.06	3.76	0.52	3.41
'Sept4'	-2.57538	3.89944e-12	2.97	1.2	13.73	13.48	2.085	13.605
'Cdh1'	-2.57647	8.73106e-06	15.42	6.87	74.71	70.43	11.145	72.57
'Wnt10a'	-2.58803	0.0183675	0.14	0.11	0.81	0.84	0.125	0.825
'Sh2d7'	-2.60033	0.0321736	0.08	0.08	0.71	0.37	0.08	0.54
'Cox6a2'	-2.60748	1.50601e-90	139.97	103.05	802.95	822.45	121.51	812.7
'Cacng6'	-2.61282	8.94886e-05	0.27	0.22	1.53	1.59	0.245	1.56
'Sema5a'	-2.61967	0.00710197	0.06	0.01	0.18	0.29	0.035	0.235
'Maged1'	-2.65506	3.34025e-56	8.07	5.43	45.14	48.16	6.75	46.65
'Ar'	-2.66638	0.0101833	0.04	0.02	0.21	0.16	0.03	0.185
'Nuak1'	-2.69273	0.0441947	0.06	0.01	0.31	0.22	0.035	0.265
'2510009E07Rik'	-2.69423	0.00367233	0.13	0.02	0.48	0.55	0.075	0.515
'Gm12253'	-2.71011	9.50096e-12	1.65	0.87	8.34	9.45	1.26	8.895
'Trpa1'	-2.73646	1.59405e-06	0.18	0.15	1.19	1.2	0.165	1.195
'Cyp46a1'	-2.76253	1.08138e-06	0.33	0.26	1.85	2.59	0.295	2.22
'Kcnk10'	-2.79945	0.00148474	0.12	0.13	0.77	1.25	0.125	1.01
'Grm8'	-2.81138	0.00104685	2.36	0.73	11.21	12.55	1.545	11.88
'Npr2'	-2.83813	1.46294e-15	0.41	0.41	3.59	3.04	0.41	3.315
'Lhfpl1'	-2.84539	0.0154379	0.09	0.12	0.8	0.92	0.105	0.86
'Ephb6'	-2.90003	1.01333e-06	0.2	0.13	1.44	1.34	0.165	1.39
'Slc46a1'	-2.91658	0.0311528	0.19	0	0.91	0.67	0.095	0.79
'Vpreb3'	-2.93473	0.0422836	0.1	0.41	1.97	2.26	0.255	2.115
'Sept5'	-2.96127	0.00472041	0.1	0.12	0.79	1	0.11	0.895
'Tmem108'	-2.97624	3.79955e-07	0.16	0.16	1.38	1.39	0.16	1.385
'Abca9'	-2.98027	0.0321582	0.03	0.02	0.23	0.16	0.025	0.195
'Timd2'	-2.9982	6.57848e-10	0.42	0.19	2.65	2.62	0.305	2.635
'Kank2'	-3.02919	3.19388e-38	1.67	0.92	12.18	10.96	1.295	11.57
'Kifc3'	-3.03402	0.00236501	0.11	0.04	0.67	0.69	0.075	0.68
'Cmklr1'	-3.04572	6.50399e-31	0.99	1.06	9.89	9.05	1.025	9.47
'Ly6k'	-3.0458	5.34166e-06	0.73	0.51	5.96	5.23	0.62	5.595
'Ace'	-3.04864	2.17019e-05	0.18	0.09	1.47	0.57	0.135	1.02
'Fn1'	-3.05736	3.48077e-32	0.47	0.36	4.03	3.48	0.415	3.755
'Lzts1'	-3.06767	6.24631e-14	0.28	0.19	2.32	2.03	0.235	2.175
'Rapgefl1'	-3.07782	2.21211e-07	0.25	0.13	1.56	1.52	0.19	1.54
'Tm4sf5'	-3.09412	0.000446707	0.46	0.17	2.34	3.52	0.315	2.93
'Myof'	-3.11918	1.77209e-17	0.26	0.16	2	1.96	0.21	1.98
'Dok7'	-3.14129	0.000143132	0.16	0.05	1.15	0.93	0.105	1.04
'Mst1r'	-3.15879	0.0341884	0.03	0.04	0.6	0.55	0.035	0.575
'1810065E05Rik'	-3.16518	0.000329604	0.54	0.12	3.49	2.99	0.33	3.24
'Adra1b'	-3.17063	0.00281608	0.12	0.02	0.65	0.69	0.07	0.67
'Matn2'	-3.17574	4.05828e-47	1.38	1.03	11.43	12.4	1.205	11.915
'Cyp2j6'	-3.19693	0.040606	0.02	0.02	0.17	0.46	0.02	0.315
'Plxna2'	-3.2094	2.95493e-14	0.15	0.08	1.38	0.95	0.115	1.165
'Nbl1'	-3.25048	1.15979e-16	0.79	0.53	6.85	6.95	0.66	6.9
'Mgl2'	-3.27626	5.05071e-21	1.23	0.84	11.21	11.13	1.035	11.17
'Apbb2'	-3.27689	2.09251e-10	0.13	0.09	1.07	1.25	0.11	1.16
'Sel1l3'	-3.29284	0.0234155	0.01	0.04	0.27	0.26	0.025	0.265
'Gnai1'	-3.3001	1.24486e-12	0.22	0.29	2.73	2.78	0.255	2.755
'Sdc2'	-3.34446	3.77471e-20	0.8	0.31	6.62	5.71	0.555	6.165
'Gm2897'	-3.36541	5.59842e-06	0.18	0.17	1.83	1.95	0.175	1.89
'Rag1'	-3.38335	1.16817e-05	0.07	0.02	0.5	0.6	0.045	0.55
'Cecr2'	-3.45271	4.95342e-14	0.08	0.09	1.08	1.03	0.085	1.055
'Scrn1'	-3.4573	1.27742e-13	0.71	0.28	6.22	5.61	0.495	5.915
'Cd300e'	-3.47205	0.0215885	0.11	0	0.84	0.43	0.055	0.635
'Cadm1'	-3.47329	2.29285e-05	1.17	0.36	9.86	8.52	0.765	9.19
'Clec2l'	-3.48249	0.00122666	0.15	0.08	1.46	1.36	0.115	1.41
'Adam2'	-3.52023	2.40358e-05	0.04	0.17	1.44	1.2	0.105	1.32
'Efna5'	-3.52371	0.000129997	0.06	0.02	0.55	0.49	0.04	0.52
'Pdgfa'	-3.54654	1.9285e-25	1.17	0.6	12.33	13.4	0.885	12.865
'Stard13'	-3.57065	0.0259641	0.01	0.02	0.13	0.24	0.015	0.185
'Vegfc'	-3.6315	4.80411e-20	0.77	0.37	7.89	7.49	0.57	7.69
'Fam171b'	-3.66805	1.73067e-06	0.04	0.06	0.65	0.65	0.05	0.65
'Nrxn2'	-3.68945	1.55605e-14	2.24	1.1	23.77	23.37	1.67	23.57
'Mtss1l'	-3.71167	6.45071e-24	0.4	0.14	4.02	4.11	0.27	4.065
'Olfml2a'	-3.72428	0.000924644	0.07	0.04	0.7	0.94	0.055	0.82
'Serpinh1'	-3.76441	2.03048e-55	2.54	1.24	27.76	28.95	1.89	28.355
'Lama3'	-3.80288	5.84921e-08	0.09	0.02	0.61	0.83	0.055	0.72
'Pnmal2'	-3.80951	4.8702e-10	0.13	0.06	1.65	1.35	0.095	1.5
'Mcoln3'	-3.85839	7.2101e-05	0.05	0.07	1.01	0.92	0.06	0.965
'Camkv'	-3.87011	1.63272e-19	0.25	0.25	4.24	3.79	0.25	4.015
'Shisa7'	-3.87334	5.38391e-09	0.05	0.05	0.83	0.78	0.05	0.805
'Gm33153'	-3.90773	0.00247568	0.14	0	1.12	1.02	0.07	1.07
'Mapk4'	-3.97802	2.7541e-08	0.07	0.07	1.02	1.15	0.07	1.085
'Stox1'	-4.11629	0.0004288	0.03	0.05	0.65	0.59	0.04	0.62
'Prkaa2'	-4.20005	7.15789e-06	0.01	0.03	0.45	0.34	0.02	0.395
'Egfr'	-4.30969	7.23726e-05	0.88	0.18	11.11	11.26	0.53	11.185
'Ripk4'	-4.39701	0.00719393	0.02	0.02	0.37	0.34	0.02	0.355
'Hmgcs2'	-4.49459	9.21352e-08	0.66	0.18	10.34	10.2	0.42	10.27
'Gpr25'	-4.61054	1.2285e-49	0.59	0.61	16.95	15.17	0.6	16.06
'Vwa2'	-4.6294	0.00346758	0.02	0.02	0.26	0.49	0.02	0.375
'Ptgds'	-4.73137	0.00199031	0.07	0.07	2.16	1.84	0.07	2
'Tgfa'	-4.81199	4.62189e-06	0.05	0	0.81	0.65	0.025	0.73
'Kitl'	-4.82958	0.0402188	0.01	0	0.23	0.08	0.005	0.155
'Myh13'	-5.38308	2.32472e-18	0.07	0.02	1.82	2	0.045	1.91
'Ddc'	-5.48673	0.0426946	0	0	0.2	0.32	0	0.26
'Msr1'	-5.63803	0.0291942	0	0	0.13	0.23	0	0.18
'Igsf10'	-5.83899	0.0177343	0	0	0.09	0.06	0	0.075
'Olfr166'	-5.84146	0.0210903	0	0	0.3	1.14	0	0.72
'Gm3500'	-5.90028	0.0151276	0	0	0.41	0.26	0	0.335
'Rflna'	-6.02473	0.00145901	0.03	0	1.29	1.08	0.015	1.185
'Rpl34-ps1'	-6.17267	0.00767726	0	0	3.02	1.23	0	2.125
'Mup16'	-6.44602	0.00277792	0	0	1.02	1.56	0	1.29
'Gdf1'	-6.60095	0.00160842	0	0	0.54	0.36	0	0.45
'Tmem35a'	-6.74172	0.000976877	0	0	0.74	0.49	0	0.615
'Mup14'	-7.35945	9.97109e-05	0	0	2.7	1.38	0	2.04
'Rbx1-ps'	-7.48489	6.18108e-05	0	0.09	5.18	2.49	0.045	3.835
'Gm4724'	-9.35029	1.02242e-08	0	0	1.2	1.95	0	1.575

## Sheet: Decreased in KO pDC
Gene Symbol	log2 (pDCKO / pDCWT)	Qvalue (pDCKO / pDCWT)	pDCKO1 FPKM	pDCKO2 FPKM	pDCWT1 FPKM	pDCWT2 FPKM	pDCKO Average FPKM	pDCWT Average FPKM
'Gm4724'	-9.35029	1.02242e-08	0	0	1.2	1.95	0	1.575
'Rbx1-ps'	-7.48489	6.18108e-05	0	0.09	5.18	2.49	0.045	3.835
'Mup14'	-7.35945	9.97109e-05	0	0	2.7	1.38	0	2.04
'Tmem35a'	-6.74172	0.000976877	0	0	0.74	0.49	0	0.615
'Gdf1'	-6.60095	0.00160842	0	0	0.54	0.36	0	0.45
'Mup16'	-6.44602	0.00277792	0	0	1.02	1.56	0	1.29
'Rpl34-ps1'	-6.17267	0.00767726	0	0	3.02	1.23	0	2.125
'Rflna'	-6.02473	0.00145901	0.03	0	1.29	1.08	0.015	1.185
'Gm3500'	-5.90028	0.0151276	0	0	0.41	0.26	0	0.335
'Olfr166'	-5.84146	0.0210903	0	0	0.3	1.14	0	0.72
'Igsf10'	-5.83899	0.0177343	0	0	0.09	0.06	0	0.075
'Msr1'	-5.63803	0.0291942	0	0	0.13	0.23	0	0.18
'Ddc'	-5.48673	0.0426946	0	0	0.2	0.32	0	0.26
'Myh13'	-5.38308	2.32472e-18	0.07	0.02	1.82	2	0.045	1.91
'Kitl'	-4.82958	0.0402188	0.01	0	0.23	0.08	0.005	0.155
'Tgfa'	-4.81199	4.62189e-06	0.05	0	0.81	0.65	0.025	0.73
'Ptgds'	-4.73137	0.00199031	0.07	0.07	2.16	1.84	0.07	2
'Vwa2'	-4.6294	0.00346758	0.02	0.02	0.26	0.49	0.02	0.375
'Gpr25'	-4.61054	1.2285e-49	0.59	0.61	16.95	15.17	0.6	16.06
'Hmgcs2'	-4.49459	9.21352e-08	0.66	0.18	10.34	10.2	0.42	10.27
'Ripk4'	-4.39701	0.00719393	0.02	0.02	0.37	0.34	0.02	0.355
'Egfr'	-4.30969	7.23726e-05	0.88	0.18	11.11	11.26	0.53	11.185
'Prkaa2'	-4.20005	7.15789e-06	0.01	0.03	0.45	0.34	0.02	0.395
'Stox1'	-4.11629	0.0004288	0.03	0.05	0.65	0.59	0.04	0.62
'Mapk4'	-3.97802	2.7541e-08	0.07	0.07	1.02	1.15	0.07	1.085
'Gm33153'	-3.90773	0.00247568	0.14	0	1.12	1.02	0.07	1.07
'Shisa7'	-3.87334	5.38391e-09	0.05	0.05	0.83	0.78	0.05	0.805
'Camkv'	-3.87011	1.63272e-19	0.25	0.25	4.24	3.79	0.25	4.015
'Mcoln3'	-3.85839	7.2101e-05	0.05	0.07	1.01	0.92	0.06	0.965
'Pnmal2'	-3.80951	4.8702e-10	0.13	0.06	1.65	1.35	0.095	1.5
'Lama3'	-3.80288	5.84921e-08	0.09	0.02	0.61	0.83	0.055	0.72
'Serpinh1'	-3.76441	2.03048e-55	2.54	1.24	27.76	28.95	1.89	28.355
'Olfml2a'	-3.72428	0.000924644	0.07	0.04	0.7	0.94	0.055	0.82
'Mtss1l'	-3.71167	6.45071e-24	0.4	0.14	4.02	4.11	0.27	4.065
'Nrxn2'	-3.68945	1.55605e-14	2.24	1.1	23.77	23.37	1.67	23.57
'Fam171b'	-3.66805	1.73067e-06	0.04	0.06	0.65	0.65	0.05	0.65
'Vegfc'	-3.6315	4.80411e-20	0.77	0.37	7.89	7.49	0.57	7.69
'Stard13'	-3.57065	0.0259641	0.01	0.02	0.13	0.24	0.015	0.185
'Pdgfa'	-3.54654	1.9285e-25	1.17	0.6	12.33	13.4	0.885	12.865
'Efna5'	-3.52371	0.000129997	0.06	0.02	0.55	0.49	0.04	0.52
'Adam2'	-3.52023	2.40358e-05	0.04	0.17	1.44	1.2	0.105	1.32
'Clec2l'	-3.48249	0.00122666	0.15	0.08	1.46	1.36	0.115	1.41
'Cadm1'	-3.47329	2.29285e-05	1.17	0.36	9.86	8.52	0.765	9.19
'Cd300e'	-3.47205	0.0215885	0.11	0	0.84	0.43	0.055	0.635
'Scrn1'	-3.4573	1.27742e-13	0.71	0.28	6.22	5.61	0.495	5.915
'Cecr2'	-3.45271	4.95342e-14	0.08	0.09	1.08	1.03	0.085	1.055
'Rag1'	-3.38335	1.16817e-05	0.07	0.02	0.5	0.6	0.045	0.55
'Gm2897'	-3.36541	5.59842e-06	0.18	0.17	1.83	1.95	0.175	1.89
'Sdc2'	-3.34446	3.77471e-20	0.8	0.31	6.62	5.71	0.555	6.165
'Gnai1'	-3.3001	1.24486e-12	0.22	0.29	2.73	2.78	0.255	2.755
'Sel1l3'	-3.29284	0.0234155	0.01	0.04	0.27	0.26	0.025	0.265
'Apbb2'	-3.27689	2.09251e-10	0.13	0.09	1.07	1.25	0.11	1.16
'Mgl2'	-3.27626	5.05071e-21	1.23	0.84	11.21	11.13	1.035	11.17
'Nbl1'	-3.25048	1.15979e-16	0.79	0.53	6.85	6.95	0.66	6.9
'Plxna2'	-3.2094	2.95493e-14	0.15	0.08	1.38	0.95	0.115	1.165
'Cyp2j6'	-3.19693	0.040606	0.02	0.02	0.17	0.46	0.02	0.315
'Matn2'	-3.17574	4.05828e-47	1.38	1.03	11.43	12.4	1.205	11.915
'Adra1b'	-3.17063	0.00281608	0.12	0.02	0.65	0.69	0.07	0.67
'1810065E05Rik'	-3.16518	0.000329604	0.54	0.12	3.49	2.99	0.33	3.24
'Mst1r'	-3.15879	0.0341884	0.03	0.04	0.6	0.55	0.035	0.575
'Dok7'	-3.14129	0.000143132	0.16	0.05	1.15	0.93	0.105	1.04
'Myof'	-3.11918	1.77209e-17	0.26	0.16	2	1.96	0.21	1.98
'Tm4sf5'	-3.09412	0.000446707	0.46	0.17	2.34	3.52	0.315	2.93
'Rapgefl1'	-3.07782	2.21211e-07	0.25	0.13	1.56	1.52	0.19	1.54
'Lzts1'	-3.06767	6.24631e-14	0.28	0.19	2.32	2.03	0.235	2.175
'Fn1'	-3.05736	3.48077e-32	0.47	0.36	4.03	3.48	0.415	3.755
'Ace'	-3.04864	2.17019e-05	0.18	0.09	1.47	0.57	0.135	1.02
'Ly6k'	-3.0458	5.34166e-06	0.73	0.51	5.96	5.23	0.62	5.595
'Cmklr1'	-3.04572	6.50399e-31	0.99	1.06	9.89	9.05	1.025	9.47
'Kifc3'	-3.03402	0.00236501	0.11	0.04	0.67	0.69	0.075	0.68
'Kank2'	-3.02919	3.19388e-38	1.67	0.92	12.18	10.96	1.295	11.57
'Timd2'	-2.9982	6.57848e-10	0.42	0.19	2.65	2.62	0.305	2.635
'Abca9'	-2.98027	0.0321582	0.03	0.02	0.23	0.16	0.025	0.195
'Tmem108'	-2.97624	3.79955e-07	0.16	0.16	1.38	1.39	0.16	1.385
'Sept5'	-2.96127	0.00472041	0.1	0.12	0.79	1	0.11	0.895
'Vpreb3'	-2.93473	0.0422836	0.1	0.41	1.97	2.26	0.255	2.115
'Slc46a1'	-2.91658	0.0311528	0.19	0	0.91	0.67	0.095	0.79
'Ephb6'	-2.90003	1.01333e-06	0.2	0.13	1.44	1.34	0.165	1.39
'Lhfpl1'	-2.84539	0.0154379	0.09	0.12	0.8	0.92	0.105	0.86
'Npr2'	-2.83813	1.46294e-15	0.41	0.41	3.59	3.04	0.41	3.315
'Grm8'	-2.81138	0.00104685	2.36	0.73	11.21	12.55	1.545	11.88
'Kcnk10'	-2.79945	0.00148474	0.12	0.13	0.77	1.25	0.125	1.01
'Cyp46a1'	-2.76253	1.08138e-06	0.33	0.26	1.85	2.59	0.295	2.22
'Trpa1'	-2.73646	1.59405e-06	0.18	0.15	1.19	1.2	0.165	1.195
'Gm12253'	-2.71011	9.50096e-12	1.65	0.87	8.34	9.45	1.26	8.895
'2510009E07Rik'	-2.69423	0.00367233	0.13	0.02	0.48	0.55	0.075	0.515
'Nuak1'	-2.69273	0.0441947	0.06	0.01	0.31	0.22	0.035	0.265
'Ar'	-2.66638	0.0101833	0.04	0.02	0.21	0.16	0.03	0.185
'Maged1'	-2.65506	3.34025e-56	8.07	5.43	45.14	48.16	6.75	46.65
'Sema5a'	-2.61967	0.00710197	0.06	0.01	0.18	0.29	0.035	0.235
'Cacng6'	-2.61282	8.94886e-05	0.27	0.22	1.53	1.59	0.245	1.56
'Cox6a2'	-2.60748	1.50601e-90	139.97	103.05	802.95	822.45	121.51	812.7
'Sh2d7'	-2.60033	0.0321736	0.08	0.08	0.71	0.37	0.08	0.54
'Wnt10a'	-2.58803	0.0183675	0.14	0.11	0.81	0.84	0.125	0.825
'Cdh1'	-2.57647	8.73106e-06	15.42	6.87	74.71	70.43	11.145	72.57
'Sept4'	-2.57538	3.89944e-12	2.97	1.2	13.73	13.48	2.085	13.605
'Alkal1'	-2.57414	0.00108489	0.52	0.52	3.06	3.76	0.52	3.41
'Akap2'	-2.57042	6.49222e-10	0.62	0.2	2.41	2.78	0.41	2.595
'Zbtb10'	-2.54129	9.68458e-37	3.46	1.95	16.78	17.66	2.705	17.22
'Adgre4'	-2.53414	0.00321379	0.19	0.08	1.12	0.55	0.135	0.835
'Fzd9'	-2.5223	0.0115704	0.31	0.05	1.34	0.92	0.18	1.13
'Il17d'	-2.51241	4.87506e-05	0.86	0.45	4.92	3.25	0.655	4.085
'Basp1'	-2.50815	1.25153e-23	3.12	2.05	16.04	16.25	2.585	16.145
'Clec4a3'	-2.49074	0.0148098	0.17	0.38	2.07	1.07	0.275	1.57
'Pfn2'	-2.49067	0.0310323	0.16	0.08	0.73	0.77	0.12	0.75
'Fam171a1'	-2.48671	0.00018943	0.15	0.18	1.22	0.88	0.165	1.05
'Ear2'	-2.47814	0.00964604	0.47	0.47	3.05	2.81	0.47	2.93
'Calhm6'	-2.47177	4.11825e-06	1.33	0.61	5.58	6.22	0.97	5.9
'Dst'	-2.45976	1.37931e-06	1.05	0.51	4.61	4.6	0.78	4.605
'Apcdd1'	-2.45219	9.40013e-08	0.72	0.33	3.08	3.18	0.525	3.13
'Epcam'	-2.45089	4.61489e-12	1.32	0.87	5.98	7.18	1.095	6.58
'Gbp6'	-2.45036	1.48232e-31	4.24	2.59	18.39	23.21	3.415	20.8
'Pir'	-2.44142	0.0136075	8.65	2.34	30.54	34.75	5.495	32.645
'Plod2'	-2.43447	6.52025e-24	1.47	1.23	8.66	7.28	1.35	7.97
'Gnb5'	-2.42148	0.000431867	0.37	0.19	1.61	1.68	0.28	1.645
'Myo5b'	-2.41489	0.0074014	0.08	0.04	0.42	0.28	0.06	0.35
'Actrt3'	-2.40904	0.0214805	0.12	0.2	0.95	0.91	0.16	0.93
'Nrp1'	-2.40675	7.2811e-06	5.77	2.71	23.37	24.54	4.24	23.955
'Adgra3'	-2.40607	6.39554e-05	0.17	0.17	0.92	1.05	0.17	0.985
'Itm2a'	-2.39294	1.20203e-07	1.01	0.67	5.03	4.62	0.84	4.825
'Upk1b'	-2.3919	0.00209459	0.53	0.18	2.63	1.42	0.355	2.025
'Gpr174'	-2.37852	7.98878e-21	1.56	0.89	6.66	7.38	1.225	7.02
'Sort1'	-2.35254	3.36913e-06	9.24	4.52	38.29	38.33	6.88	38.31
'Ctif'	-2.34195	5.93006e-17	0.87	0.53	3.95	3.79	0.7	3.87
'Fyb2'	-2.34006	4.17839e-45	6.27	4.93	28.4	34.99	5.6	31.695
'Rgs7bp'	-2.33565	1.86934e-13	0.48	0.41	2.28	2.75	0.445	2.515
'Ly6d'	-2.32846	1.20762e-112	307.69	277.06	1512.66	1720.58	292.375	1616.62
'Emid1'	-2.32661	1.18951e-28	3.3	3.21	18.2	18.01	3.255	18.105
'Il7r'	-2.32584	2.89017e-10	19.15	11.17	82.27	84.1	15.16	83.185
'Cd200'	-2.32373	9.72275e-36	7.48	5.03	33.28	35.46	6.255	34.37
'Slc9a2'	-2.31912	0.0300048	0.08	0.09	0.48	0.45	0.085	0.465
'Akap12'	-2.30404	2.35432e-10	0.4	0.28	1.83	1.86	0.34	1.845
'Atp2a1'	-2.30348	6.18732e-46	8.36	5.82	39.6	37.13	7.09	38.365
'Gprasp2'	-2.29213	0.00648187	0.12	0.13	0.76	0.56	0.125	0.66
'Cav2'	-2.28734	7.44271e-06	0.61	0.34	2.6	2.4	0.475	2.5
'Adgrl2'	-2.2763	3.89793e-09	0.74	0.3	2.64	2.73	0.52	2.685
'LOC102632102'	-2.2757	0.0492107	0.13	0.2	0.87	0.85	0.165	0.86
'Ncs1'	-2.27546	0.0499563	0.05	0.08	0.39	0.31	0.065	0.35
'Sh3pxd2b'	-2.27294	0.0327519	0.03	0.06	0.33	0.17	0.045	0.25
'Atp1b1'	-2.27255	2.27678e-07	76.16	40.96	318.5	300.22	58.56	309.36
'Snph'	-2.26921	0.000589014	0.14	0.17	0.85	0.73	0.155	0.79
'Wnt10b'	-2.26298	1.46661e-09	0.7	0.87	4.55	3.62	0.785	4.085
'Ccdc9b'	-2.25582	0.0131044	0.13	0.06	0.42	0.52	0.095	0.47
'Rhbdf1'	-2.24675	0.00685974	0.27	0.14	1.07	0.79	0.205	0.93
'Gprc5c'	-2.24615	0.00604422	0.23	0.08	0.93	0.73	0.155	0.83
'Aldh1l1'	-2.23654	0.0108822	0.28	0.07	0.78	1.04	0.175	0.91
'Ephx2'	-2.22235	0.0350812	0.19	0.13	0.78	0.86	0.16	0.82
'Usp2'	-2.21463	8.55784e-07	0.59	0.35	2.67	2.22	0.47	2.445
'Vegfd'	-2.21419	1.7444e-05	0.97	0.49	3.15	3.99	0.73	3.57
'Maged2'	-2.20987	0.00441047	0.26	0.26	1.19	1.38	0.26	1.285
'Mzb1'	-2.20938	4.47903e-30	15.92	11.01	64.96	71.73	13.465	68.345
'Bcar3'	-2.20431	0.000573865	0.24	0.24	1.13	1.2	0.24	1.165
'Spry1'	-2.19299	3.14353e-09	0.96	1.47	6.7	5.18	1.215	5.94
'Pde5a'	-2.17697	1.04269e-07	0.43	0.23	1.47	1.83	0.33	1.65
'Klhl41'	-2.17413	0.00175484	0.45	0.25	1.11	2.2	0.35	1.655
'Inpp4b'	-2.16994	3.85729e-16	1.1	0.66	4.16	4.08	0.88	4.12
'Tgfbr3'	-2.16912	1.06361e-05	0.26	0.17	0.99	1.12	0.215	1.055
'Vcan'	-2.15767	0.0414138	0.05	0.03	0.17	0.26	0.04	0.215
'Auts2'	-2.15521	3.53443e-07	0.32	0.25	1.37	1.34	0.285	1.355
'Slc22a12'	-2.15242	3.9283e-12	1.81	1.2	7.34	7.36	1.505	7.35
'Cib2'	-2.15059	9.80982e-09	3.91	2.51	15.84	15.43	3.21	15.635
'Pld1'	-2.13946	0.000216757	0.27	0.14	0.98	0.99	0.205	0.985
'LOC100861615'	-2.13891	0.0183077	0.38	0.15	1.02	1.37	0.265	1.195
'Cnn3'	-2.12974	2.28131e-24	4.11	3.38	18.32	17.76	3.745	18.04
'Il18'	-2.10254	0.0013394	0.72	0.9	3.46	4.35	0.81	3.905
'Ifit3'	-2.09583	2.03308e-06	0.9	0.74	3.58	4.16	0.82	3.87
'Arpp21'	-2.08885	1.82125e-11	0.88	1.16	4.72	4.63	1.02	4.675
'Diras2'	-2.08619	0.000320616	0.33	0.23	1.67	0.94	0.28	1.305
'Obscn'	-2.08494	0.00113788	2.73	1.16	8.74	9.24	1.945	8.99
'Il17rb'	-2.08278	4.26867e-54	11.62	11.35	53.23	53.97	11.485	53.6
'Dll4'	-2.07974	1.61647e-17	4.54	2.38	16.49	15.52	3.46	16.005
'Aoah'	-2.07261	0.00780268	0.39	0.13	1.43	1.32	0.26	1.375
'Tlr5'	-2.06845	6.03936e-06	0.69	0.35	2.82	2.34	0.52	2.58
'Pls1'	-2.06704	0.00901816	0.17	0.15	0.69	0.76	0.16	0.725
'Galc'	-2.04631	9.10634e-13	1	1.13	4.55	4.9	1.065	4.725
'Rnd3'	-2.04278	3.96926e-52	35.74	25.96	139.43	139.67	30.85	139.55
'Gpr162'	-2.04087	2.64957e-28	7.42	5.04	29.29	27.76	6.23	28.525
'Pard3'	-2.03543	0.0271612	0.09	0.08	0.3	0.42	0.085	0.36
'Lamc1'	-2.02655	3.20222e-16	0.86	0.63	3.44	3.24	0.745	3.34
'Slc6a9'	-2.02075	0.000423639	0.43	0.26	1.64	1.39	0.345	1.515
'Ppm1e'	-2.02001	4.06517e-20	2.93	1.69	9.73	10.81	2.31	10.27
'Lca5l'	-2.01941	0.0227829	0.26	0.11	0.69	0.97	0.185	0.83
'Clec10a'	-2.01445	7.91419e-83	52.22	47.67	217.81	226.47	49.945	222.14
'Clstn1'	-2.01374	8.49674e-26	2.61	2.11	10.94	9.97	2.36	10.455
'Tppp'	-2.00414	0.00552933	0.2	0.1	0.61	0.7	0.15	0.655
'Plekha6'	-2.00383	1.16247e-10	0.44	0.4	2.04	1.79	0.42	1.915
'Ttc39a'	-1.98598	0.000149096	1.05	0.41	3.01	3.37	0.73	3.19
'Ralgps2'	-1.98055	0.00243191	2.61	0.9	6.95	6.59	1.755	6.77
'Elovl6'	-1.97668	8.36389e-31	3.34	2.44	12.45	12.51	2.89	12.48
'Ddn'	-1.96798	1.07464e-20	2.17	2.38	10.49	9.15	2.275	9.82
'Ccr3'	-1.96422	0.0243669	0.19	0.24	0.83	0.83	0.215	0.83
'Tmtc2'	-1.95922	0.000924644	0.18	0.26	0.7	0.8	0.22	0.75
'Rnase4'	-1.94766	0.000256723	2.01	0.64	6.1	4.73	1.325	5.415
'Mtus2'	-1.94607	0.00417031	0.3	0.15	0.83	1.04	0.225	0.935
'Gm3488'	-1.94406	8.20863e-06	1.21	0.78	3.91	5.09	0.995	4.5
'Xkrx'	-1.94228	1.03632e-60	16.13	14.51	68.26	64.63	15.32	66.445
'Dnaja4'	-1.94114	1.00629e-05	0.67	0.5	2.51	2.43	0.585	2.47
'Farp1'	-1.93293	9.74607e-05	0.48	0.22	1.43	1.48	0.35	1.455
'Ldhb'	-1.9252	5.0612e-29	27.4	17.96	91	98.27	22.68	94.635
'Magee2'	-1.92316	0.00468264	0.59	0.24	1.62	1.8	0.415	1.71
'Slamf6'	-1.91541	2.06177e-43	10.5	9.09	42.69	45.6	9.795	44.145
'Itgb4'	-1.9112	0.00450142	0.16	0.12	0.53	0.61	0.14	0.57
'Slc22a17'	-1.90567	5.49507e-07	0.97	1.01	3.91	4.28	0.99	4.095
'Rras2'	-1.89961	7.08862e-16	4.72	2.98	15.35	16.23	3.85	15.79
'Arhgap24'	-1.89494	3.37726e-14	2.08	1.52	6.98	8.25	1.8	7.615
'Adamtsl2'	-1.88097	4.10182e-10	1.35	1.68	5.13	7.12	1.515	6.125
'Fgd1'	-1.87923	0.0453623	0.16	0.11	0.44	0.67	0.135	0.555
'A830010M20Rik'	-1.87915	1.84119e-19	1.47	1.16	5.13	5.54	1.315	5.335
'Sbspon'	-1.87323	0.0122947	0.26	0.26	1.07	1	0.26	1.035
'Nnt'	-1.872	1.30609e-49	9.68	8.76	37.73	36.56	9.22	37.145
'Fbxl13'	-1.86941	1.67182e-06	1.72	0.8	4.71	5.28	1.26	4.995
'Bmp6'	-1.86465	1.42341e-06	1.14	0.67	3.36	3.85	0.905	3.605
'Chrnb1'	-1.8549	1.74228e-14	3.33	2.6	11.1	11.87	2.965	11.485
'Fabp5'	-1.8471	3.59584e-08	3.77	2.96	13.43	13.08	3.365	13.255
'Tmem163'	-1.84295	4.69643e-30	12.28	9.31	42.13	41.18	10.795	41.655
'Hid1'	-1.8417	2.63587e-11	2.33	1.4	7.09	7.59	1.865	7.34
'Duxbl3'	-1.84137	0.0231116	11.59	4.6	32.21	31.16	8.095	31.685
'Sntg2'	-1.83803	0.000480562	0.63	0.7	2.51	2.45	0.665	2.48
'Tubb2b'	-1.83287	3.57524e-22	18.45	11.32	58.11	58.09	14.885	58.1
'Pla2g4f'	-1.82633	0.00278829	0.42	0.38	1.42	1.74	0.4	1.58
'Cpa3'	-1.81982	0.036342	0.38	0.44	1.59	1.58	0.41	1.585
'Arhgef10l'	-1.81919	4.98592e-16	5.15	2.81	16.52	15.21	3.98	15.865
'Acvr2a'	-1.81816	2.10834e-13	1.72	1.12	5.11	5.73	1.42	5.42
'Camsap3'	-1.80555	1.30082e-07	0.78	0.64	3.05	2.64	0.71	2.845
'Hrh1'	-1.80482	1.37856e-05	0.51	0.6	2.16	2.13	0.555	2.145
'Lrp8'	-1.80445	1.01724e-30	29.72	19.16	95.25	92.84	24.44	94.045
'Ptprf'	-1.80137	5.93535e-49	12.89	10.22	45.79	43.07	11.555	44.43
'Csf1'	-1.80127	0.0017136	0.36	0.23	1.14	1.07	0.295	1.105
'Syde2'	-1.79528	0.0148985	0.17	0.13	0.61	0.55	0.15	0.58
'Prrg4'	-1.78656	1.61965e-07	1.65	0.97	4.95	4.9	1.31	4.925
'Thbs1'	-1.78305	0.000314555	0.38	0.24	1.38	0.94	0.31	1.16
'Lgalsl'	-1.78216	0.00259704	0.3	0.32	1.12	1.2	0.31	1.16
'Cacnb2'	-1.78036	1.73424e-06	0.63	0.6	2.05	2.19	0.615	2.12
'Vangl1'	-1.77423	0.0307384	0.13	0.09	0.55	0.4	0.11	0.475
'Slc16a7'	-1.77369	2.09251e-10	1.33	0.69	4.17	3.98	1.01	4.075
'Myh14'	-1.75749	5.38638e-10	0.98	0.65	3.06	2.99	0.815	3.025
'Chst10'	-1.75665	0.00343942	0.4	0.33	1.32	1.32	0.365	1.32
'Cdk5r1'	-1.75456	0.00294715	0.44	0.22	1.44	1.02	0.33	1.23
'Rcn1'	-1.75354	1.91099e-12	1.99	1.82	7.02	7.08	1.905	7.05
'Irak1bp1'	-1.74935	0.0341612	0.4	0.32	1.35	1.23	0.36	1.29
'Gbp10'	-1.74396	8.81686e-06	0.9	0.59	2.76	2.66	0.745	2.71
'Tmem38b'	-1.73775	2.28188e-06	1.42	0.83	4.07	4.12	1.125	4.095
'Gm15433'	-1.73689	0.00173756	1.28	0.36	2.6	3.29	0.82	2.945
'Fcrla'	-1.72969	2.62273e-64	65.85	62.71	226.89	242.83	64.28	234.86
'Fgd6'	-1.72228	0.00261949	0.25	0.13	0.7	0.63	0.19	0.665
'Anks6'	-1.71296	5.18004e-08	1.31	0.85	3.58	3.66	1.08	3.62
'Gpr20'	-1.70952	0.0467501	0.06	0.11	0.67	0.9	0.085	0.785
'Inafm2'	-1.70856	8.2738e-20	15.63	9.47	45.11	44.78	12.55	44.945
'Rbpms'	-1.70585	1.66995e-08	2.01	2.01	5.88	6.22	2.01	6.05
'Serinc5'	-1.70031	1.04187e-07	29.56	18.81	81.53	90.77	24.185	86.15
'Kif7'	-1.69889	0.00452359	0.35	0.23	0.86	1.24	0.29	1.05
'Tubb3'	-1.69382	0.00450268	0.83	0.57	2.44	2.54	0.7	2.49
'Fcgr2b'	-1.6928	1.06659e-21	9.46	9.54	34.05	32.22	9.5	33.135
'Srpk3'	-1.68988	2.34367e-08	2.76	1.91	7.99	8.65	2.335	8.32
'Kif5c'	-1.68104	0.0492522	0.09	0.09	0.29	0.37	0.09	0.33
'Ppp1r14b'	-1.6789	9.34833e-33	32.85	28.51	110.71	105.44	30.68	108.075
'Gbp2'	-1.66245	0.0179028	0.38	0.35	1.26	1.28	0.365	1.27
'Cacna1e'	-1.66164	0.0456684	15.21	5.43	36.37	34.07	10.32	35.22
'Tmigd3'	-1.65931	0.000598077	2.75	1.38	6.92	7.65	2.065	7.285
'Abca5'	-1.65846	1.66352e-07	1.34	0.61	3.28	3.46	0.975	3.37
'Ifi44'	-1.64793	9.15465e-20	9.47	6.69	25.73	29.56	8.08	27.645
'Meis3'	-1.64529	8.59806e-05	1.72	1.1	4.56	4.85	1.41	4.705
'Epha2'	-1.64314	2.98249e-45	52.83	41.65	162.71	164.3	47.24	163.505
'Gnb4'	-1.64153	2.32803e-12	5.74	3.04	15.78	14.76	4.39	15.27
'Prkcg'	-1.64008	7.08819e-38	12.69	13.39	44.87	44.71	13.04	44.79
'Dennd5b'	-1.6385	1.01007e-07	0.53	0.37	1.57	1.64	0.45	1.605
'Col17a1'	-1.63463	3.21499e-07	1.11	0.65	2.9	3.14	0.88	3.02
'B3gnt9'	-1.63149	2.09752e-08	2.12	1.8	6.51	6.84	1.96	6.675
'Inka1'	-1.62672	3.21855e-05	3.97	2.18	9.92	10.89	3.075	10.405
'A530032D15Rik'	-1.62622	7.29497e-12	11.41	7.02	31.89	30.02	9.215	30.955
'Tmem254b'	-1.62585	2.20104e-45	38.35	36.95	130.12	126.34	37.65	128.23
'Tnfsf10'	-1.62453	3.072e-05	1.2	0.53	2.76	3.01	0.865	2.885
'Bdh1'	-1.62312	4.72656e-06	1.13	0.98	3.98	3.19	1.055	3.585
'Rpl3l'	-1.6217	0.000505394	1.38	0.75	4.01	4.29	1.065	4.15
'Rasal2'	-1.61858	0.000160773	0.24	0.22	0.75	0.8	0.23	0.775
'Lynx1'	-1.61435	1.09378e-20	8.47	5.83	24.71	23.33	7.15	24.02
'Macrod2'	-1.61426	0.0385224	0.21	0.27	0.8	0.68	0.24	0.74
'Nfe2l3'	-1.61267	1.55265e-06	2.05	1.34	5	6.38	1.695	5.69
'Thnsl2'	-1.60666	0.00127538	1.24	0.65	3.11	3.23	0.945	3.17
'P2ry13'	-1.60188	4.58135e-18	13.21	8.77	34.03	39.17	10.99	36.6
'2700081O15Rik'	-1.59457	2.75745e-08	1.05	1.07	3.7	3.37	1.06	3.535
'Timp2'	-1.59164	0.000365777	20.55	11.2	53.32	51.36	15.875	52.34
'Tmem254a'	-1.58888	0.00463998	0.77	0.68	1.91	2.63	0.725	2.27
'Lat'	-1.58471	0.000185224	1.7	2.03	5.91	6.42	1.865	6.165
'Fah'	-1.58362	0.0434724	0.69	0.38	1.69	1.82	0.535	1.755
'Sdc3'	-1.57913	1.08173e-19	6.44	4.77	19.89	17.08	5.605	18.485
'Grin3b'	-1.57431	0.0300326	0.55	0.3	1.44	0.99	0.425	1.215
'Gpc1'	-1.57395	3.48753e-08	1.54	1.25	4.38	4.67	1.395	4.525
'Abcg3'	-1.56757	1.35602e-09	3.12	2.19	7.92	9.38	2.655	8.65
'Gem'	-1.56678	6.788e-11	6.81	4.02	17.5	17.66	5.415	17.58
'Rgs18'	-1.56501	4.45074e-29	16.91	14.97	49.81	54.3	15.94	52.055
'Duxbl1'	-1.56212	0.00500828	17.57	8.69	40.61	38.78	13.13	39.695
'Cobll1'	-1.56051	2.7704e-18	5.89	4.08	16.24	16.02	4.985	16.13
'Erbb3'	-1.55983	1.64189e-09	4	2.22	10.84	9.2	3.11	10.02
'Pon3'	-1.55786	9.34017e-06	3.95	2.24	9.22	9.59	3.095	9.405
'Scamp1'	-1.55652	3.03124e-06	1.21	0.9	3.27	3.63	1.055	3.45
'Adam19'	-1.55289	2.91712e-34	26.38	20.32	74	77.05	23.35	75.525
'Taf9b'	-1.54952	1.14791e-07	2.67	1.82	6.72	7.77	2.245	7.245
'Man1c1'	-1.53947	1.36196e-27	28.48	22.75	84.82	73.8	25.615	79.31
'March9'	-1.53802	0.000628791	1.09	1	3.41	3.29	1.045	3.35
'Kdr'	-1.53126	0.0181728	3.18	1.39	6.95	7.11	2.285	7.03
'Mapre3'	-1.52728	0.000509448	1.05	1.38	3.73	3.96	1.215	3.845
'Pqlc3'	-1.52164	1.74995e-47	45.73	44.33	142.18	144.6	45.03	143.39
'Ephb2'	-1.51747	1.76954e-20	1.87	2.14	6.5	6.14	2.005	6.32
'Prmt2'	-1.51266	0.000160773	1.46	1.17	4.35	3.97	1.315	4.16
'Nat8l'	-1.50999	1.38077e-06	0.67	0.67	2.28	1.92	0.67	2.1
'Mfsd7a'	-1.50989	0.00235815	0.95	0.6	2.44	2.5	0.775	2.47
'Prss34'	-1.5092	4.29885e-05	2.89	3.05	8.61	10.04	2.97	9.325
'Ifih1'	-1.50809	3.47975e-08	2.47	1.41	5.18	5.73	1.94	5.455
'Adk'	-1.50687	4.55185e-10	13.61	7.23	32.61	32.73	10.42	32.67
'Dip2c'	-1.50667	1.676e-11	1.36	1.02	3.76	3.64	1.19	3.7
'Eya1'	-1.50211	2.68493e-13	2.36	2.51	7.62	7.53	2.435	7.575
'Rai2'	-1.49689	2.52046e-07	3.75	2.28	9.66	9.04	3.015	9.35
'Psd3'	-1.49476	1.72271e-07	0.71	0.52	2	1.92	0.615	1.96
'Pam'	-1.49172	0.00117065	0.64	0.58	2.2	1.51	0.61	1.855
'Gbp5'	-1.49159	0.000635622	1.38	0.66	3.24	3.01	1.02	3.125
'App'	-1.48959	9.1223e-12	2.78	1.93	9.96	8.34	2.355	9.15
'Wdsub1'	-1.48762	2.59264e-06	2.63	1.95	6.89	7.01	2.29	6.95
'Gm3383'	-1.48195	5.16306e-05	1.81	1.94	5.39	6.21	1.875	5.8
'Fam174b'	-1.48092	9.34852e-05	1.1	1.29	3.28	4.06	1.195	3.67
'Tulp3'	-1.47907	0.00194269	0.68	0.55	2.07	1.67	0.615	1.87
'Dab2ip'	-1.47684	0.000815405	0.4	0.35	1.12	1.17	0.375	1.145
'Il1rl2'	-1.47589	6.2578e-08	1.46	1.23	4.48	4.67	1.345	4.575
'P2ry6'	-1.4722	7.95532e-10	6.04	4.07	15.68	15.14	5.055	15.41
'Dbndd1'	-1.46777	0.0321646	1.27	0.47	2.55	2.5	0.87	2.525
'Havcr1'	-1.46633	1.92506e-22	46.01	32.95	116.73	125.33	39.48	121.03
'Bag2'	-1.46414	0.00403705	1.42	0.81	3.55	3.17	1.115	3.36
'Ddx60'	-1.46237	0.0381923	0.25	0.18	0.55	0.63	0.215	0.59
'Angptl7'	-1.45563	1.11134e-09	8.65	5.2	19.14	22.5	6.925	20.82
'Rgs10'	-1.45167	2.81471e-23	45.87	37.81	118.06	134.38	41.84	126.22
'Gdpd1'	-1.44969	0.000588619	1.09	0.93	2.87	3.23	1.01	3.05
'Prg2'	-1.44725	0.00180818	2.87	3.05	7.08	10.76	2.96	8.92
'Laptm4b'	-1.43507	4.03713e-09	3.89	4.12	11.31	12.56	4.005	11.935
'Afap1'	-1.43262	0.0138374	0.25	0.21	0.72	0.6	0.23	0.66
'Cd276'	-1.4323	2.24819e-06	1.78	1.35	4.79	4.48	1.565	4.635
'Cd209a'	-1.42973	0.00316547	35.36	18.63	80.25	78.78	26.995	79.515
'Rundc3b'	-1.42609	0.0098931	0.68	0.34	1.46	1.58	0.51	1.52
'Rassf8'	-1.42483	1.84342e-08	1.26	1.54	4.23	3.78	1.4	4.005
'2610042L04Rik'	-1.42223	0.005803	1.36	1.24	3.23	3.64	1.3	3.435
'Cd1d1'	-1.42172	4.68398e-09	4.43	4.01	13.27	11.66	4.22	12.465
'Casc4'	-1.41644	1.74546e-07	1.46	1.54	4.21	4.7	1.5	4.455
'Map2k6'	-1.41506	4.0984e-07	3.36	2.17	8.38	9.16	2.765	8.77
'Zfp521'	-1.41441	3.28049e-07	1.54	0.95	3.75	3.58	1.245	3.665
'Ceacam1'	-1.41207	8.38276e-33	19.87	17.14	55.06	54.37	18.505	54.715
'Notch3'	-1.40581	5.25152e-11	4.19	2.47	10.11	9.22	3.33	9.665
'Apba1'	-1.40565	9.86885e-32	8.89	8.16	25.75	24	8.525	24.875
'Btbd3'	-1.404	1.01328e-12	5.3	3.57	12.85	12.9	4.435	12.875
'Oasl2'	-1.40103	1.30052e-16	13.68	10.3	33.09	35.95	11.99	34.52
'Synpo2'	-1.39951	0.0313808	0.31	0.23	0.77	0.69	0.27	0.73
'Thsd1'	-1.3992	0.0247627	0.34	0.31	1.07	0.93	0.325	1
'Arl5c'	-1.39721	8.87001e-31	34.06	32.08	92.83	99.36	33.07	96.095
'Stau2'	-1.39126	0.00800693	0.97	0.46	1.75	2.4	0.715	2.075
'Epsti1'	-1.38789	4.78732e-28	36.5	30.9	93.93	96.19	33.7	95.06
'Tspyl4'	-1.38647	6.7047e-09	3.91	2.42	8.98	9.18	3.165	9.08
'Lxn'	-1.38464	4.63477e-06	4.77	4.23	12.88	13	4.5	12.94
'Hs3st3b1'	-1.38104	3.39894e-08	1.74	1.22	4.44	3.98	1.48	4.21
'Gm38690'	-1.37908	0.0467501	0.86	0.52	1.17	1.61	0.69	1.39
'Cdc42bpa'	-1.37773	0.0131692	0.37	0.15	0.64	0.85	0.26	0.745
'Ranbp17'	-1.37103	0.0256599	0.46	0.33	1.18	1.13	0.395	1.155
'Bfsp2'	-1.36621	0.0149829	1.05	1.01	2.76	3.08	1.03	2.92
'Slc35d3'	-1.3646	0.000252139	1.47	1.26	4.37	3.44	1.365	3.905
'Nqo2'	-1.36242	6.20329e-05	1.28	1.02	3.22	3.16	1.15	3.19
'Mxd4'	-1.35806	1.09247e-16	18.34	16.02	49.15	47.75	17.18	48.45
'Btg3'	-1.35792	1.21833e-18	19.82	17.42	52.11	52.64	18.62	52.375
'Fstl3'	-1.35219	3.75669e-10	5.56	4.82	14.4	14.68	5.19	14.54
'Slc25a15'	-1.35161	5.3465e-05	1.81	1.08	4.14	4	1.445	4.07
'Ispd'	-1.35073	0.00962848	0.83	0.51	1.79	1.97	0.67	1.88
'Srl'	-1.35029	3.56576e-12	4.02	3.24	10	10.78	3.63	10.39
'Them6'	-1.34783	1.77577e-19	22.67	18.4	57.76	57.16	20.535	57.46
'Src'	-1.34301	5.44356e-05	1.55	0.99	3.45	3.59	1.27	3.52
'Mras'	-1.34144	3.47214e-08	3.53	2.28	7.82	8.23	2.905	8.025
'Zdhhc23'	-1.3409	4.65039e-09	1.72	1.5	4.73	4.25	1.61	4.49
'Spns3'	-1.34041	2.34951e-32	43.1	38.78	113.99	112.74	40.94	113.365
'Sema7a'	-1.34002	1.694e-13	13.36	8.97	32.91	28.83	11.165	30.87
'Fam20b'	-1.3392	2.29904e-14	8.79	5.97	20.15	20.85	7.38	20.5
'Mansc1'	-1.33825	0.00556576	1.26	0.75	2.93	2.64	1.005	2.785
'Id3'	-1.33474	0.00260712	3.22	2.32	7.95	7.4	2.77	7.675
'Tmem65'	-1.33387	9.19979e-07	1.88	1.54	4.61	5.12	1.71	4.865
'Usp20'	-1.33362	1.27701e-17	7.49	5.96	18.99	18.25	6.725	18.62
'Trio'	-1.33176	6.69246e-14	2.2	1.66	5.57	5.12	1.93	5.345
'Rps6ka2'	-1.33021	5.20747e-07	1.3	1.16	3.54	3.28	1.23	3.41
'Rnf187'	-1.32078	2.0063e-45	123.18	115.58	328.71	328.02	119.38	328.365
'Cpped1'	-1.31241	9.18031e-10	5.49	4.04	12.94	12.8	4.765	12.87
'Ypel2'	-1.30485	5.14784e-12	4.35	3.19	10.4	10.04	3.77	10.22
'Itgad'	-1.30269	4.20921e-09	2.82	2.59	7.91	6.72	2.705	7.315
'Prkag2'	-1.30197	1.83512e-25	18.04	14.96	52.96	51.55	16.5	52.255
'2410004P03Rik'	-1.29927	7.0034e-05	2.77	2.46	6.51	7.51	2.615	7.01
'Tulp4'	-1.29774	6.71616e-12	2.11	1.5	5.42	5.03	1.805	5.225
'Comtd1'	-1.29348	0.00645839	1.17	0.89	2.62	2.93	1.03	2.775
'Oas1a'	-1.29198	3.37935e-06	4.63	3.8	11.56	10.85	4.215	11.205
'Egln3'	-1.28987	0.0001827	1.46	1.55	4.2	3.92	1.505	4.06
'Gm2666'	-1.28715	0.00290074	1.87	1.07	3.73	4.12	1.47	3.925
'Gpr85'	-1.28117	0.0139905	0.87	0.57	1.89	1.91	0.72	1.9
'C8a'	-1.28099	1.89704e-06	3.03	1.92	6.19	6.69	2.475	6.44
'Usp18'	-1.27966	8.25196e-12	17.55	12.21	36.97	42.33	14.88	39.65
'Sccpdh'	-1.27858	0.0143117	1.02	0.99	2.56	2.82	1.005	2.69
'As3mt'	-1.27177	6.18548e-11	7.58	7.29	19.96	19.87	7.435	19.915
'Fam222a'	-1.2716	0.0377445	0.65	0.5	1.69	1.32	0.575	1.505
'Ets1'	-1.27131	3.63605e-20	17.66	13.26	40.15	42.16	15.46	41.155
'Angpt1'	-1.27081	0.00794713	0.81	0.44	1.78	1.72	0.625	1.75
'Pnck'	-1.27027	1.40358e-13	19.56	14.58	46.95	43.41	17.07	45.18
'Clcn5'	-1.26859	1.52474e-15	7.72	5.31	16.55	17.41	6.515	16.98
'Sorcs2'	-1.26737	1.60161e-05	0.94	0.95	2.53	2.49	0.945	2.51
'Fggy'	-1.26712	8.22502e-07	4.28	4.73	11.32	13.52	4.505	12.42
'Ebpl'	-1.26635	3.52882e-06	3.47	2.84	8.32	8.37	3.155	8.345
'Cd163'	-1.26444	2.95549e-07	1.96	1.76	5.01	4.91	1.86	4.96
'2610002M06Rik'	-1.26419	0.000131561	1.3	0.81	2.4	3.16	1.055	2.78
'Phpt1'	-1.26152	0.000282007	7.45	11.97	25.57	26	9.71	25.785
'Rora'	-1.25834	0.0148891	0.22	0.16	0.48	0.55	0.19	0.515
'Blcap'	-1.2579	1.36001e-15	13.09	10.93	31.16	31.95	12.01	31.555
'Arhgap6'	-1.25622	4.09672e-09	3.49	2.64	7.68	8.6	3.065	8.14
'Pdzd4'	-1.25394	3.98957e-23	42.22	33.05	99.98	97.84	37.635	98.91
'Il27ra'	-1.25319	1.02535e-06	3.63	2.81	7.54	8.64	3.22	8.09
'Pgam2'	-1.25259	9.39873e-10	16.46	17.01	39.1	48.83	16.735	43.965
'Pxylp1'	-1.25027	3.90087e-12	5.96	5.52	15.79	14.26	5.74	15.025
'Gadd45a'	-1.24914	9.38006e-05	4.51	3.63	11.04	10.23	4.07	10.635
'Bglap3'	-1.24797	0.0101781	2.69	2.57	6.34	6.6	2.63	6.47
'Gm10406'	-1.24719	0.000580635	2.08	2.19	4.9	6.29	2.135	5.595
'Rell1'	-1.24664	1.03491e-18	72.44	51.18	159.53	161.93	61.81	160.73
'2310022B05Rik'	-1.2452	5.66768e-15	10.49	8.05	24.47	23.81	9.27	24.14
'Hs3st1'	-1.24448	4.27621e-26	48.02	42.88	122.16	113.95	45.45	118.055
'Tent5c'	-1.2407	2.69045e-12	6.02	5.99	14.81	14.68	6.005	14.745
'Abhd17b'	-1.24054	2.59901e-17	37.61	27	81.11	86.72	32.305	83.915
'Stambpl1'	-1.23965	7.63608e-23	24.35	21.8	60.39	60.12	23.075	60.255
'Zdhhc14'	-1.2373	7.61977e-20	23.74	19.17	56.36	58.76	21.455	57.56
'Ell2'	-1.23329	2.47883e-07	5.99	3.53	11.6	12.86	4.76	12.23
'Slco3a1'	-1.22813	3.61745e-14	6.46	5.63	15.75	15.32	6.045	15.535
'Arl11'	-1.2276	1.02406e-06	5.64	4.93	13.44	13.88	5.285	13.66
'Tbc1d12'	-1.2264	0.0139923	0.64	0.54	1.65	1.74	0.59	1.695
'Iigp1'	-1.22345	1.23156e-05	5.11	3.16	8.94	12.36	4.135	10.65
'P3h3'	-1.22309	0.00349294	1.11	1.26	2.68	3.51	1.185	3.095
'Tmem221'	-1.22308	2.73101e-20	35.83	30.12	86.87	81.98	32.975	84.425
'Galnt7'	-1.22089	7.118e-11	4.63	3.56	10.46	10.52	4.095	10.49
'Inppl1'	-1.21985	5.69995e-17	13.25	9.71	30.32	29.7	11.48	30.01
'Traf3ip2'	-1.217	9.31246e-11	7.27	5.95	17.37	17.12	6.61	17.245
'Mdfic'	-1.21455	0.000963974	1.84	1.09	3.4	3.96	1.465	3.68
'Ak8'	-1.21412	7.98416e-11	10.22	10.89	29.17	25.34	10.555	27.255
'Naip5'	-1.21379	3.78745e-21	14.67	12.16	33.39	35.4	13.415	34.395
'Cbr1'	-1.2133	1.31851e-05	5.95	6.01	15.48	14.95	5.98	15.215
'Pvr'	-1.21103	9.75732e-10	4.59	4.44	11.19	11.83	4.515	11.51
'Ly6c2'	-1.20828	8.45097e-40	539.53	490.39	1305.29	1312.87	514.96	1309.08
'Hsph1'	-1.20661	1.44723e-08	9.36	5.72	18.24	20.81	7.54	19.525
'Trim36'	-1.20359	4.3665e-08	3.71	2.57	7.71	8.15	3.14	7.93
'Jup'	-1.20186	0.00218183	1.11	1.63	4.13	2.9	1.37	3.515
'Ms4a4c'	-1.20005	0.000109898	5.59	3.27	10.63	11.73	4.43	11.18
'Soga1'	-1.19987	4.60465e-14	8.59	5.99	19.73	17.25	7.29	18.49
'Tubb2a'	-1.19732	4.29869e-12	80.27	50.5	165.97	162.53	65.385	164.25
'Nceh1'	-1.19634	1.84994e-15	18.63	13.27	39.84	40.27	15.95	40.055
'Isg15'	-1.19614	5.7073e-06	12.06	9.42	25.39	28.51	10.74	26.95
'Apod'	-1.19593	3.85306e-05	3.22	3.09	7.07	8.9	3.155	7.985
'Clcf1'	-1.1952	4.20645e-10	8.23	9.5	22.15	22.67	8.865	22.41
'Plcg1'	-1.19515	3.92983e-10	4.46	3.53	10.64	9.47	3.995	10.055
'Trp53i11'	-1.19506	9.91741e-25	30.15	28.36	77.84	70.45	29.255	74.145
'Svbp'	-1.19244	2.79484e-06	14.11	10.4	29.83	31.35	12.255	30.59
'Zhx3'	-1.18621	2.5304e-05	1.66	1.29	3.75	3.65	1.475	3.7
'Adcy9'	-1.18578	0.00763132	0.47	0.33	1.12	0.9	0.4	1.01
'Galk1'	-1.18562	1.02651e-13	18.53	15.42	41.78	43.14	16.975	42.46
'Phgdh'	-1.18245	2.07844e-20	26.44	24.7	65.86	61.92	25.57	63.89
'Dynlt3'	-1.18069	3.14174e-07	10.43	6.53	19.35	22.83	8.48	21.09
'Usp46'	-1.17756	7.09352e-05	2.61	1.69	5.17	5.37	2.15	5.27
'Trp53inp2'	-1.17586	1.54482e-09	4.28	3.22	9.85	9.63	3.75	9.74
'Uchl3'	-1.17573	6.28405e-10	17.35	15.16	39.35	41.5	16.255	40.425
'Ldlrad3'	-1.17555	6.12815e-11	8.9	6.21	18.77	18.79	7.555	18.78
'Stk3'	-1.1741	8.31023e-08	4.58	4.23	10.06	10.58	4.405	10.32
'Bend4'	-1.17176	4.87212e-06	1.42	1.28	3.24	2.72	1.35	2.98
'Nav2'	-1.1706	1.3251e-11	3.08	2.3	6.45	6.49	2.69	6.47
'Paqr5'	-1.16831	1.47478e-23	18	17.11	43.59	43.45	17.555	43.52
'Gale'	-1.16613	4.23071e-06	6.83	5.38	13.54	16.63	6.105	15.085
'Lipo3'	-1.16584	4.96128e-05	4.06	2.35	7.75	9.13	3.205	8.44
'Map7'	-1.16512	3.75065e-07	2.84	2.41	6.52	6.64	2.625	6.58
'Sil1'	-1.16429	1.70363e-16	22.2	19.42	50.3	53.28	20.81	51.79
'Eml5'	-1.16352	3.4099e-06	0.85	0.86	1.86	2.22	0.855	2.04
'Dll1'	-1.1616	0.0204143	1.74	0.63	2.92	2.78	1.185	2.85
'Gng12'	-1.15759	3.91739e-16	16.53	12.5	35.17	35.87	14.515	35.52
'Etv1'	-1.15676	0.00744729	0.91	0.65	1.89	2.01	0.78	1.95
'Klra17'	-1.1566	1.41783e-17	61.24	48.94	128.59	141.41	55.09	135
'Xaf1'	-1.15558	9.28421e-06	7	6.06	13.74	16.71	6.53	15.225
'Pkn3'	-1.15531	0.000698392	1.68	1.17	3.58	3.68	1.425	3.63
'Sytl1'	-1.15111	4.97124e-08	7.22	8.65	20.65	18.2	7.935	19.425
'Phc1'	-1.14842	1.47537e-20	17.06	14.78	37.97	39.75	15.92	38.86
'Marcks'	-1.14739	8.60317e-13	7.37	6.09	17.17	15.63	6.73	16.4
'Zcchc24'	-1.14682	2.26576e-16	26.67	19.58	56.48	55.95	23.125	56.215
'Cpq'	-1.14649	0.000814946	2.47	2.17	5.59	5.72	2.32	5.655
'Cd209d'	-1.14573	1.15132e-11	78.69	53.12	160.86	159.15	65.905	160.005
'Hdac3'	-1.1426	2.88472e-15	15.6	15.85	38.91	37.8	15.725	38.355
'Gm3636'	-1.14192	0.000135972	3.62	3.49	8.25	8.95	3.555	8.6
'Abi2'	-1.14062	9.91704e-06	1.52	1.23	3.22	3.24	1.375	3.23
'Rpf2'	-1.13958	1.49781e-07	10.53	8.78	22.81	24.46	9.655	23.635
'Adcy3'	-1.13955	2.70679e-05	1.57	1.37	3.57	3.61	1.47	3.59
'Kdelc2'	-1.13772	0.00548769	1.14	0.78	2.29	2.38	0.96	2.335
'Spata13'	-1.1374	4.04056e-12	10.34	7.26	21.6	21.2	8.8	21.4
'Ahi1'	-1.13736	0.000122283	2.06	1.34	4.43	4.26	1.7	4.345
'Ugt1a7c'	-1.13593	0.000291514	1.74	1.53	3.72	4.18	1.635	3.95
'Slc27a1'	-1.13306	8.60548e-24	31.92	33.5	80.23	78.42	32.71	79.325
'Nme3'	-1.1329	7.07306e-06	12	12.92	28.03	32.26	12.46	30.145
'Kdm1b'	-1.13252	8.7038e-18	12.64	10.1	26.94	29.93	11.37	28.435
'Frmd4a'	-1.13244	3.781e-14	18.46	13.05	38.59	37.19	15.755	37.89
'Muc5ac'	-1.13093	3.69204e-06	0.84	0.76	1.97	1.9	0.8	1.935
'Kctd6'	-1.12384	4.53564e-05	2.71	2.94	7.63	5.93	2.825	6.78
'Cpne2'	-1.12174	2.24999e-10	15.97	11.39	33.5	31.75	13.68	32.625
'Abcb4'	-1.12109	0.00084462	3.02	1.56	5.95	5.15	2.29	5.55
'Cebpd'	-1.121	1.06535e-05	3.53	3.76	8.96	8.51	3.645	8.735
'Csprs'	-1.12044	0.0149829	1.68	0.96	3.65	2.64	1.32	3.145
'Gbp8'	-1.12015	1.94501e-16	19.94	16.57	41.88	44.84	18.255	43.36
'Rell2'	-1.11845	0.0302762	1.12	1.04	2.3	3.11	1.08	2.705
'Plk2'	-1.11843	0.00189565	1.63	1.69	4.53	3.41	1.66	3.97
'Klk1'	-1.11772	4.40394e-13	416.37	290.37	759.73	924.28	353.37	842.005
'Dcun1d4'	-1.11238	7.30846e-06	2.37	1.92	5.03	5.27	2.145	5.15
'Fam241a'	-1.11225	5.14784e-05	9.54	5.5	18.39	17.24	7.52	17.815
'Uqcc2'	-1.11193	3.00384e-05	18.31	17.95	38.74	47.9	18.13	43.32
'Hspa4l'	-1.10983	3.26741e-08	2.77	1.78	5.88	5.77	2.275	5.825
'Grn'	-1.10909	7.26443e-23	459.72	373.89	1036.81	939.27	416.805	988.04
'Cacna1d'	-1.10481	9.67361e-13	5.89	4.34	12.02	12.27	5.115	12.145
'Chdh'	-1.10104	1.4345e-28	46.15	41.08	102.67	104.26	43.615	103.465
'Acyp1'	-1.10025	0.00418463	6.05	7.04	15.61	14.87	6.545	15.24
'Cd72'	-1.09813	6.79744e-16	39.3	32.84	81.7	89.88	36.07	85.79
'Gapt'	-1.09676	2.93425e-17	60.25	46.17	126	124.1	53.21	125.05
'Rrm2b'	-1.09509	2.42474e-09	5.1	3.99	10.19	11.16	4.545	10.675
'Gas7'	-1.09393	1.33006e-16	24.22	18.18	49.62	50.57	21.2	50.095
'Man2a1'	-1.09347	7.12531e-11	7.15	5.15	14.26	13.9	6.15	14.08
'Pde2a'	-1.09283	0.00168989	1.14	1.03	2.57	2.52	1.085	2.545
'Creb3l2'	-1.09086	2.15977e-15	9.15	7.52	19.89	18.84	8.335	19.365
'Khk'	-1.0892	1.55298e-18	47.24	42.84	100.8	110.61	45.04	105.705
'Zfyve21'	-1.08622	0.00314046	3.85	2.84	7.78	7.83	3.345	7.805
'Acsl1'	-1.08593	1.04761e-17	19.71	16.35	41.67	42.04	18.03	41.855
'Fosl2'	-1.08453	0.0131434	0.5	0.59	1.4	1.15	0.545	1.275
'Tmem191c'	-1.08427	0.000603878	3.79	4.31	9.02	9.92	4.05	9.47
'Atp1a1'	-1.08405	2.96861e-23	108.13	90.23	240.21	222.09	99.18	231.15
'Edem3'	-1.08138	2.08048e-16	9.72	7.94	20.56	20.53	8.83	20.545
'Ctbs'	-1.07841	0.000428268	2.73	1.91	5.45	5.14	2.32	5.295
'Ssx2ip'	-1.07813	0.00650684	2.01	1.02	3.54	3.44	1.515	3.49
'Fndc3b'	-1.07704	8.09452e-06	4.99	2.66	8.78	8.92	3.825	8.85
'Golim4'	-1.07665	1.34274e-11	7.01	5.86	14.72	15.65	6.435	15.185
'Glcci1'	-1.07634	0.00494145	26.07	15.86	46.83	51.27	20.965	49.05
'Mitf'	-1.07473	0.00157309	1.13	0.92	2.42	2.34	1.025	2.38
'Pole4'	-1.07012	6.24779e-09	15.15	13.49	29.79	30.65	14.32	30.22
'Hacd1'	-1.06858	0.021005	2.2	2.14	4.52	4.54	2.17	4.53
'1190002N15Rik'	-1.06626	7.49769e-06	7.12	4.1	13.19	12.55	5.61	12.87
'Evi5'	-1.06402	1.05323e-11	8.18	5.99	16.23	17.15	7.085	16.69
'Cxxc5'	-1.06313	1.72988e-21	51.52	44.56	113.25	111.38	48.04	112.315
'Ago4'	-1.06091	1.37829e-07	6.77	4.15	12.5	12.18	5.46	12.34
'Socs5'	-1.06024	0.000211305	1.77	1.3	3.53	3.71	1.535	3.62
'Crem'	-1.05971	0.00202445	2.58	1.72	5.1	5.38	2.15	5.24
'Arrdc3'	-1.05881	4.06192e-06	8.03	4.67	14.08	14.88	6.35	14.48
'Mtx2'	-1.05811	0.000267893	8.12	5.4	14.33	16.56	6.76	15.445
'Aga'	-1.05786	3.88635e-05	7.57	6.95	16.31	15.43	7.26	15.87
'Klhl42'	-1.05784	7.55953e-14	9.4	8.88	25.93	24.12	9.14	25.025
'Ifi213'	-1.0577	0.000151211	5.65	3.75	9.19	12.09	4.7	10.64
'Nbdy'	-1.05767	0.0480204	2.75	2.53	6.34	5.76	2.64	6.05
'Ier5l'	-1.05588	0.000381702	4.02	4.65	10.58	9.31	4.335	9.945
'Ptgr1'	-1.05533	0.000921543	4.38	4.02	10.17	9.2	4.2	9.685
'Tox3'	-1.05389	0.0447513	0.83	0.65	1.91	1.46	0.74	1.685
'Tmem150a'	-1.05353	0.000286753	4.51	4.12	9.92	9.79	4.315	9.855
'Aph1b'	-1.04937	0.00527382	0.98	0.81	1.86	2.22	0.895	2.04
'Prkra'	-1.04813	2.47737e-06	6.99	7.28	16.04	16.2	7.135	16.12
'Fnip2'	-1.0477	7.37154e-06	1.53	1.92	3.8	4.03	1.725	3.915
'Siglech'	-1.04639	8.52477e-27	944.98	854.97	1902.53	1951.06	899.975	1926.8
'Eid1'	-1.04589	1.79405e-15	26.95	22.34	53.74	58.17	24.645	55.955
'Abcd3'	-1.03841	5.96227e-05	2.9	2.29	6.05	5.67	2.595	5.86
'Dmwd'	-1.03729	1.16102e-05	3.98	3.85	8.62	9.08	3.915	8.85
'Fam43a'	-1.03522	2.65028e-08	19.63	12.58	36.67	35.67	16.105	36.17
'Gbp3'	-1.03492	0.00228702	2.22	1.74	4.5	4.37	1.98	4.435
'Stk26'	-1.03445	1.30774e-07	12.3	8.26	21.08	25.05	10.28	23.065
'E130308A19Rik'	-1.03156	0.00577459	1.48	1.04	3.11	2.6	1.26	2.855
'Kremen1'	-1.02868	8.05649e-07	4.86	3.6	9.09	9.06	4.23	9.075
'Smim13'	-1.02865	4.0894e-06	3.12	2.44	6.26	6.19	2.78	6.225
'Slc44a1'	-1.02713	2.12597e-10	23.61	16.03	44.11	44.94	19.82	44.525
'Slc12a4'	-1.02586	2.6643e-07	4.41	3.94	9.97	8.73	4.175	9.35
'Wfs1'	-1.02261	1.17185e-16	15.53	15.29	34.33	34.66	15.41	34.495
'Tmem106c'	-1.02198	8.45161e-11	21.09	17.88	43.14	43.55	19.485	43.345
'Qdpr'	-1.02112	1.55999e-09	21.4	16.93	43.02	42.46	19.165	42.74
'1110008P14Rik'	-1.02083	6.35047e-06	18.74	22.8	47.54	45.53	20.77	46.535
'Itgb1'	-1.02037	2.00181e-14	31	23.51	60.02	61.42	27.255	60.72
'Smim5'	-1.01999	1.33663e-21	92.32	90.23	203.95	222.19	91.275	213.07
'Lpgat1'	-1.01978	1.23085e-11	16.81	12	31.14	30.79	14.405	30.965
'Six5'	-1.0183	0.00411693	2.1	1.49	3.87	4.04	1.795	3.955
'Osbpl5'	-1.01737	0.024142	1.66	0.76	2.54	2.98	1.21	2.76
'Ctsl'	-1.01729	3.90087e-12	320.67	221.17	577.47	630.54	270.92	604.005
'Stox2'	-1.01527	2.10334e-05	2.51	1.51	4.47	4.49	2.01	4.48
'Herc6'	-1.01518	5.51119e-06	4.97	3.13	9.22	8.71	4.05	8.965
'Ostm1'	-1.0123	2.8406e-10	19.36	13.96	37.19	36.59	16.66	36.89
'Arl5a'	-1.01155	9.66495e-10	11.37	8.03	21.96	20.95	9.7	21.455
'Gtf3c6'	-1.0115	2.49598e-09	11.7	9.25	24.38	26.25	10.475	25.315
'Camsap2'	-1.01118	3.58657e-07	3.46	2.47	6.85	6.59	2.965	6.72
'Polm'	-1.0101	5.23371e-05	3.64	2.91	7.59	7	3.275	7.295
'Tmem205'	-1.00981	0.0355507	3.95	3	7.9	7.8	3.475	7.85
'Shb'	-1.00935	3.52027e-05	4.37	3.46	9.21	8.11	3.915	8.66
'Magi3'	-1.00911	0.0385458	0.47	0.37	1.02	0.84	0.42	0.93
'Cox20'	-1.00844	0.000370919	21.74	16.48	49.88	36.6	19.11	43.24
'Scimp'	-1.00758	2.35939e-13	58.4	47.79	113	121.76	53.095	117.38
'Rasgrf1'	-1.00608	0.0240654	0.47	0.53	1.18	1.06	0.5	1.12
'Slc5a3'	-1.00573	0.00658333	0.53	0.35	0.96	0.98	0.44	0.97
'Fam220a'	-1.00473	5.04124e-06	8.03	5.72	15.39	14.91	6.875	15.15
'Amigo1'	-1.00466	0.00427011	1.13	0.77	1.86	1.88	0.95	1.87
'Trim3'	-1.0036	2.62928e-10	9.32	9.23	21.19	19.87	9.275	20.53
'Atp5s'	-1.00268	0.0185065	2.09	1.92	4.4	4.5	2.005	4.45
'Cgnl1'	-1.0021	2.48028e-05	1.55	1.87	3.89	3.66	1.71	3.775
'Bloc1s1'	-1.0017	2.64998e-08	37.57	39.16	80.79	88.6	38.365	84.695
'Gpr137b'	-1.00089	4.08783e-15	38.39	31.03	75.98	73.68	34.71	74.83
